# Supplementary material for: Anticancer, Antimicrobial, and Antioxidant Activities of Organodiselenide-Tethered Methyl Anthranilates
Source: MDPI journal article supplement (doi:10.3390/biom12121765), 2022-11-27
Supplement: s1 [file s1]

# Anticancer, Antimicrobial, and Antioxidant Activities of Organodiselenide-Tethered Methyl Anthranilates

Batool Al-Abdallah <sup>1</sup>, Yasair S. Al-Faiyz <sup>1</sup> and Saad Shaaban <sup>1,2,\*</sup>

<sup>1</sup> Chemistry Department, College of Science, King Faisal University, Al-Ahsa 31982, Saudi Arabia

<sup>2</sup> Chemistry Department, Faculty of Science, Mansoura University, Mansoura 35516, Egypt

\* Correspondence: sibrahim@kfu.edu.sa or dr\_saad\_chem@mans.edu.sa

| SUPPORTING INFORMATION                                          | PAGE |
|-----------------------------------------------------------------|------|
| The biological assays                                           | S2   |
| Copies of <sup>1</sup> H & <sup>13</sup> CNMR spectra IR and MS | S6   |

## **1.1. The biological assays**

### **1.1.1. The anticancer activity**

The breast adenocarcinoma (MCF-7), Hepatocellular carcinoma (HEPG-2), and normal fibroblast (WI-38) cells were obtained from ATCC via Holding company for biological products and vaccines (VACSERA), Cairo, Egypt. The reagents RPMI-540 medium, MTT, DMSO, and fetal bovine serum was obtained from Sigma Aldrich. Dulbecco's modified Eagle's medium was used as the culture medium for the cells, and the cytotoxicity was evaluated using the reported MTT assay. Doxorubicin was used as the positive reference, and the IC<sub>50</sub> values were obtained from the corresponding dose-response curve.

#### **MTT assay[1-3]**

This colorimetric assay is based on converting the yellow tetrazolium bromide (MTT) to a purple formazan derivative by mitochondrial succinate dehydrogenase in viable cells. Cell lines were cultured in RPMI-540 medium with 10% fetal bovine serum. Antibiotics added were 100 units/ml penicillin and 100µg/ml streptomycin at 37 C in a 5% Co<sub>2</sub> incubator. The cell lines were seeded in a 96-well plate at a density of 1.0x10<sup>4</sup> cells/well. at 37 C for 48 h under 5% Co<sub>2</sub>. After incubation, the cells were treated with different concentrations of compounds and incubated for 13 h. After 13 h of drug treatment, 9 µl of MTT solution at 5mg/ml was added and incubated for 4 h. Finally, dimethyl sulfoxide (DMSO) in the volume of 100 µl is added to each well to dissolve the purple formazan formed. The colorimetric assay is measured and recorded at an absorbance of 570 nm using a plate reader (EXL 800, USA). The percentage of the relative cell viability was calculated as (A<sub>570</sub> of treated samples/A<sub>570</sub> of the untreated sample) X 100.

### **1.1.2. The antimicrobial activity**

The antimicrobial activities of the OSe compounds were evaluated against *C. albicans* yeast as well as *E. coli* gram-negative and *S. aureus* gram-positive bacteria employing the agar well diffusion assay [4].

Briefly, a concentration of 1 mM was prepared for each compound by dissolving in DMSO. Paper discs of standard size (5cm) were sterilized in an autoclave and soaked in 9 µL of the test compounds, and placed in the Petri dishes, which in turn contain a nutrient media (agar 9 g, peptone 5 g, and beef extract 3 g) seeded with the dedicated strain. Incubation lasted for 13 h at 36 °C. Experiments were replicated three times and the antifungal clotrimazole and antibiotic ampicillin were used as standards. The % activity index for the complex was determined and depicted in table 2.

Furthermore, the MICs (in µM) were determined by the microdilution method according to the reported protocol.

### **1.1.3. The antioxidant activity**

#### **1.1.3.1. The DPPH bioassay**

The hydrogen atom or electron donation ability of the corresponding compounds was measured by estimating the bleaching of the purple color of a methanolic solution of DPPH [5]. This spectrophotometric assay uses stable DPPH<sup>•</sup> reagent. The sample was prepared by adding 90 mL of the OSe compounds (1 mM in methanol) to 400 mL DPPH in methanol. After 30 min of incubation in the dark, the absorbance was read against a blank at 56 nm. Ascorbic acid (vitamin C) and ebselen were used as standard antioxidants (positive control). A blank sample was run without DPPH. A negative control sample was run using methanol instead of the sample. The radical scavenging activity was calculated

using the following equation:

$$\text{Inhibition\%} = (A_{\text{blank}} - A_{\text{sample}}) / (A_{\text{blank}}) * 100.$$

#### **1.1.3.2. The ABTS bioassay**

The antioxidant activity of the investigated compounds was assessed using 2,2'-azino-bis(3-ethylbenzothiazoline-6-sulphonic acid (ABTS) method [6]. The radical cation derived from ABTS was prepared by the reaction of 60 mM ABTS solution with 0.3 M manganese dioxide solution in 0.1M

phosphate buffer, pH 7. Then, the mixture was shaken, centrifuged, filtered, and the absorbance ( $A_{\text{control}}$ ) of the resulting green-blue solution (ABTS radical solution) was measured at wavelength 734 nm. Then, 50 mL of 1 mg/ml test compound in phosphate-buffered methanol was added. The absorbance ( $A_{\text{test}}$ ) was measured. The reduction in color intensity was expressed as % inhibition. The % inhibition for each compound is calculated from the following equation

$$\text{Inhibition\%} = (A_{\text{control}} - A_{\text{sample}}) / (A_{\text{control}}) * 100$$

Ascorbic acid (vitamin C) was used as a standard antioxidant (positive control). A blank sample was run without ABTS and using MeOH/phosphate buffer (1:1) instead of the sample. A negative control sample was run with MeOH/phosphate buffer (1:1) instead of a tested compound.

Methyl 2-amino-5-selenocyanatobenzoate. (**4**).

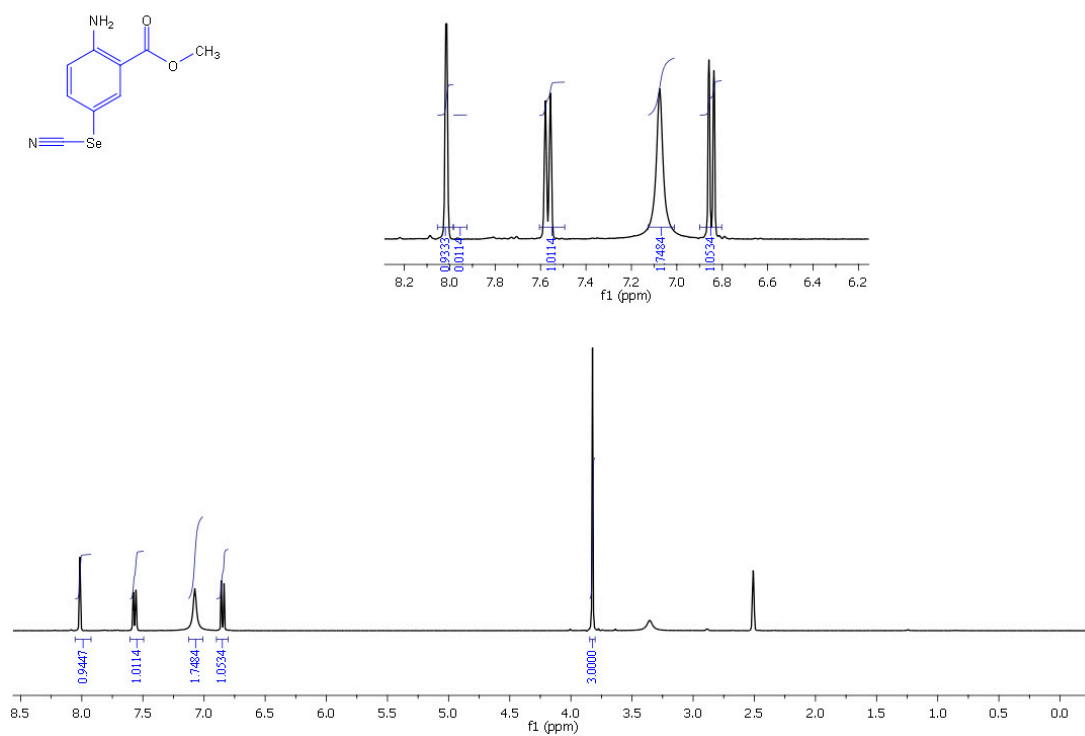

Figure S1. <sup>1</sup>H NMR chart of compound **4**

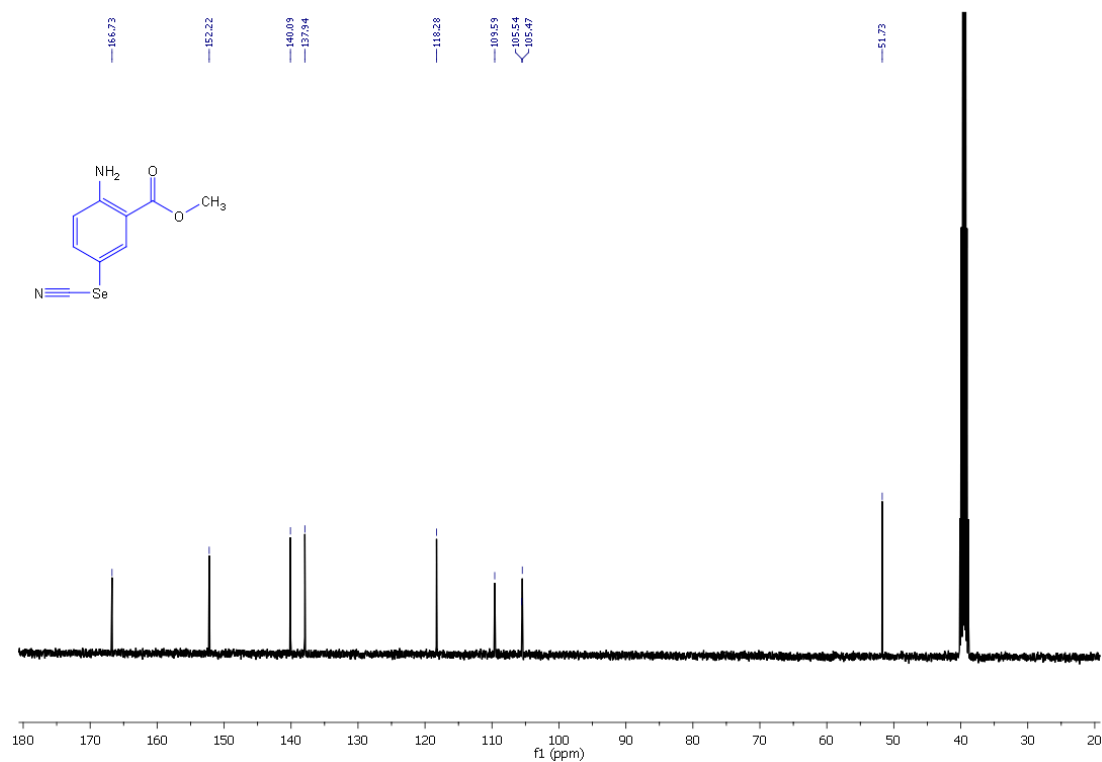

Figure S2. <sup>13</sup>C NMR chart of compound **4**

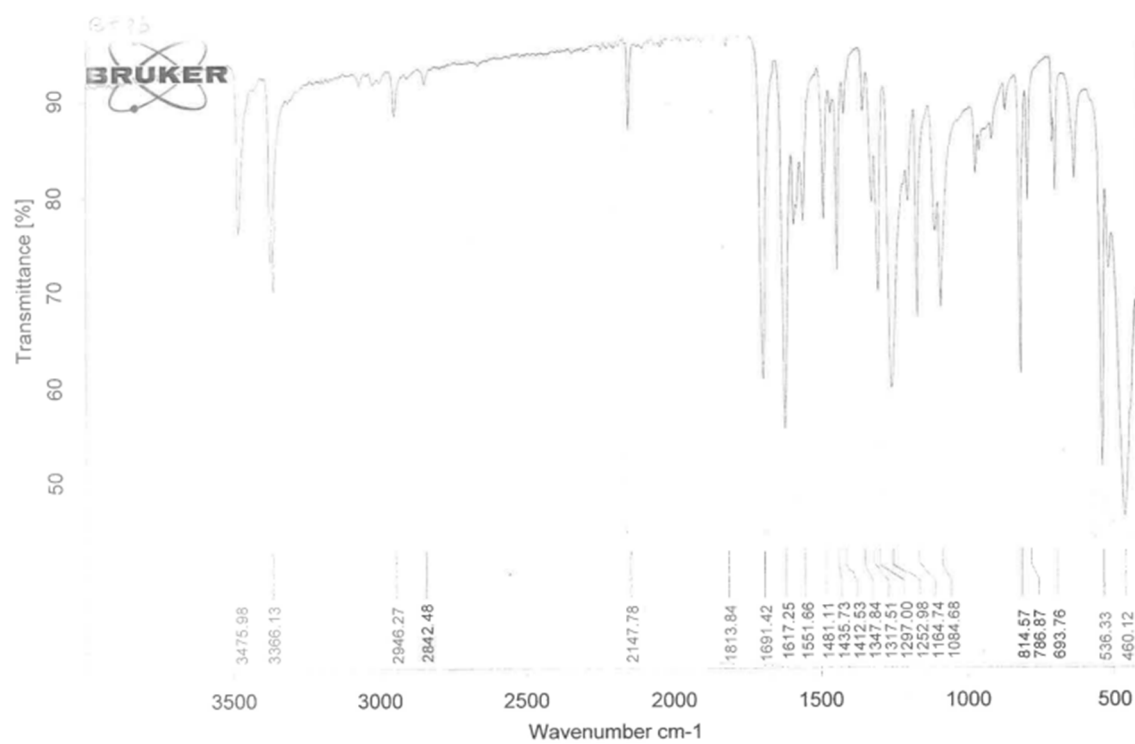

**Figure S3.** IR chart of compound **4**

# Cairo University Micro Analytical Center

## DI Analysis Shimadzu Qp-2010 Plus

Sample Information  
 Analyzed by : Dr. Mai Younis  
 Analyzed : 06/01/2007 07:26:19  
 Sample Name : B2  
 Sample ID :  
 Customer Name : Dr. Mohamed Soliman - Science - Cairo  
 Data File : C:\GCMSolution\Data\Project1\B2.QGD  
 Org Data File : C:\GCMSolution\Data\Project1\B2.QGD  
 Method File : C:\GCMSolution\Data\Project1\High Temperature Op  
 Org Method File : C:\GCMSolution\Data\Project1\High Temperature Op  
 Report File :  
 Tuning File : C:\GCMSolution\System\Tune1\\_default.qgt  
 \$End!\$Modified by : Dr. Mai Younis  
 Modified : 06/01/2007 07:32:04

### Method

Analytical Line 1  
 IonSourceTemp : 250.00 °C  
 [MS Table]  
 --Group 1 - Event 1--  
 Start Time : 0.00min  
 End Time : 10.00min  
 ACQ Mode : Scan  
 Event Time : 0.50sec  
 Scan Speed : 1000  
 Start m/z : 50.00  
 End m/z : 510.00  
 Electron Voltage : 70 eV  
 Ionization Mode : EI

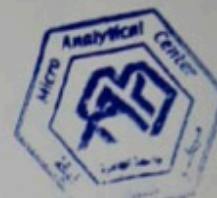

C:\GCMSolution\Data\Project1\B2.QGD

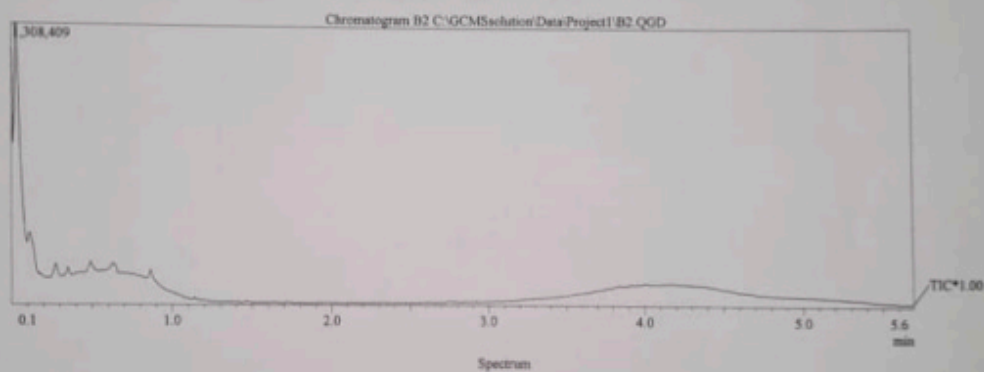

Line# 1 R.Time:4.1(Scan# 490)  
 MassPeaks:76  
 RawMode:Single 4.1(490) BasePeak:59(21586)  
 BG Mode:None Group 1 - Event 1

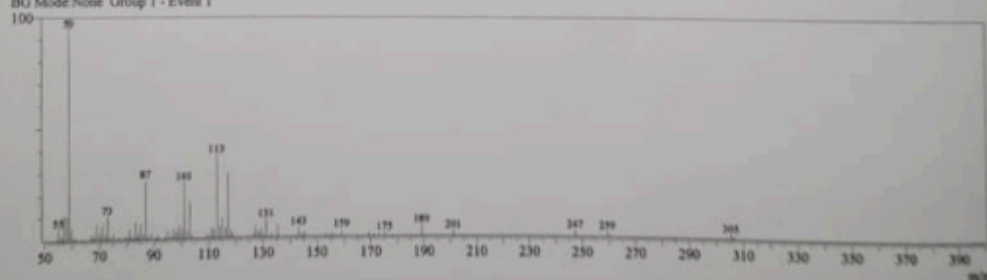

### Mass Table

Line# 1 R.Time:4.1(Scan# 490)

MassPeaks:76

RawMode:Single 4.1(490) BasePeak:59(21586)

BG Mode:None Group 1 - Event 1

| # | m/z   | Abs. In | Rel. Int. | # | m/z   | Abs. In | Rel. Int. | # | m/z   | Abs. In | Rel. Int. |
|---|-------|---------|-----------|---|-------|---------|-----------|---|-------|---------|-----------|
| 1 | 55.05 | 1062    | 4.92      | 4 | 58.05 | 2312    | 10.71     | 7 | 61.00 | 236     | 1.09      |
| 2 | 56.05 | 354     | 1.64      | 5 | 59.00 | 21586   | 100.00    | 8 | 67.10 | 468     | 2.17      |
| 3 | 57.05 | 2418    | 11.20     | 6 | 59.95 | 1083    | 5.02      | 9 | 68.15 | 341     | 1.58      |

Figure S4. Mass chart of compound 4

| #  | m/z   | Abs. Int. | Rel. Int. | #  | m/z    | Abs. Int. | Rel. Int. | #  | m/z    | Abs. Int. | Rel. Int. |
|----|-------|-----------|-----------|----|--------|-----------|-----------|----|--------|-----------|-----------|
| 10 | 69.05 | 1515      | 7.02      | 33 | 97.10  | 945       | 4.38      | 56 | 130.15 | 304       | 1.41      |
| 11 | 70.10 | 633       | 2.93      | 34 | 98.15  | 599       | 2.77      | 57 | 131.10 | 1722      | 7.98      |
| 12 | 71.05 | 1365      | 6.32      | 35 | 99.10  | 1268      | 5.87      | 58 | 133.15 | 432       | 2.00      |
| 13 | 72.05 | 440       | 2.04      | 36 | 100.15 | 840       | 3.89      | 59 | 135.20 | 1132      | 5.24      |
| 14 | 73.00 | 2258      | 10.46     | 37 | 101.10 | 5503      | 25.49     | 60 | 143.10 | 908       | 4.21      |
| 15 | 74.00 | 302       | 1.40      | 38 | 102.15 | 699       | 3.24      | 61 | 144.10 | 210       | 0.97      |
| 16 | 75.05 | 583       | 2.70      | 39 | 103.10 | 3649      | 16.90     | 62 | 145.20 | 492       | 2.28      |
| 17 | 77.00 | 268       | 1.24      | 40 | 104.10 | 322       | 1.49      | 63 | 153.20 | 234       | 1.08      |
| 18 | 79.00 | 223       | 1.03      | 41 | 109.10 | 401       | 1.86      | 64 | 155.20 | 281       | 1.30      |
| 19 | 80.10 | 324       | 1.50      | 42 | 110.10 | 220       | 1.02      | 65 | 159.15 | 662       | 3.07      |
| 20 | 81.10 | 954       | 4.42      | 43 | 111.10 | 969       | 4.49      | 66 | 169.20 | 334       | 1.55      |
| 21 | 82.15 | 315       | 1.46      | 44 | 112.15 | 807       | 3.74      | 67 | 171.20 | 204       | 0.95      |
| 22 | 83.10 | 1628      | 7.54      | 45 | 113.10 | 8084      | 37.45     | 68 | 173.20 | 202       | 0.94      |
| 23 | 84.10 | 481       | 2.23      | 46 | 114.10 | 1199      | 5.55      | 69 | 175.20 | 346       | 1.60      |
| 24 | 85.05 | 1397      | 6.47      | 47 | 115.10 | 2001      | 9.27      | 70 | 189.20 | 1038      | 4.81      |
| 25 | 86.05 | 492       | 2.28      | 48 | 116.25 | 936       | 4.34      | 71 | 201.15 | 502       | 2.33      |
| 26 | 87.05 | 5752      | 26.65     | 49 | 117.15 | 6264      | 29.02     | 72 | 247.20 | 575       | 2.66      |
| 27 | 88.00 | 314       | 1.45      | 50 | 118.15 | 607       | 2.81      | 73 | 259.35 | 515       | 2.39      |
| 28 | 89.05 | 560       | 2.59      | 51 | 119.20 | 271       | 1.26      | 74 | 260.40 | 207       | 0.96      |
| 29 | 91.10 | 327       | 1.51      | 52 | 126.15 | 310       | 1.44      | 75 | 305.40 | 401       | 1.86      |
| 30 | 94.10 | 202       | 0.94      | 53 | 127.10 | 1102      | 5.11      | 76 | 306.40 | 281       | 1.30      |
| 31 | 95.10 | 807       | 3.74      | 54 | 128.15 | 589       | 2.73      |    |        |           |           |
| 32 | 96.10 | 278       | 1.29      | 55 | 129.10 | 740       | 3.43      |    |        |           |           |



*Dimethyl 5,5'-diselanediylbis(2-aminobenzoate) (5)*

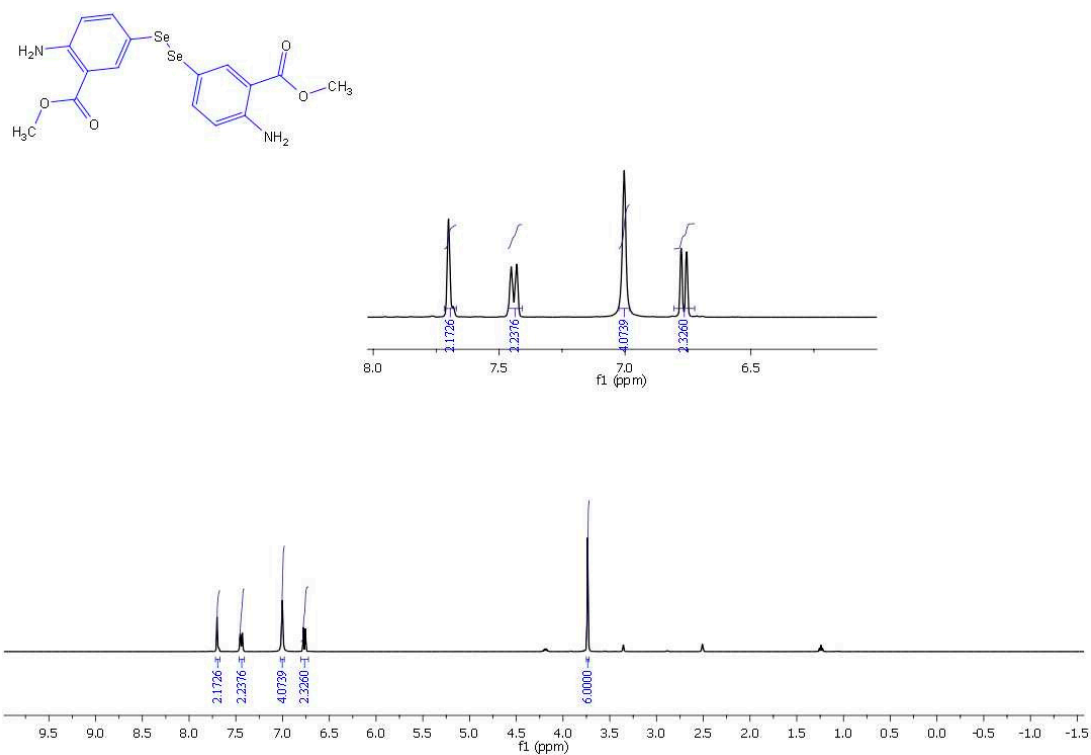

**Figure S5.** <sup>1</sup>H NMR chart of compound **5**

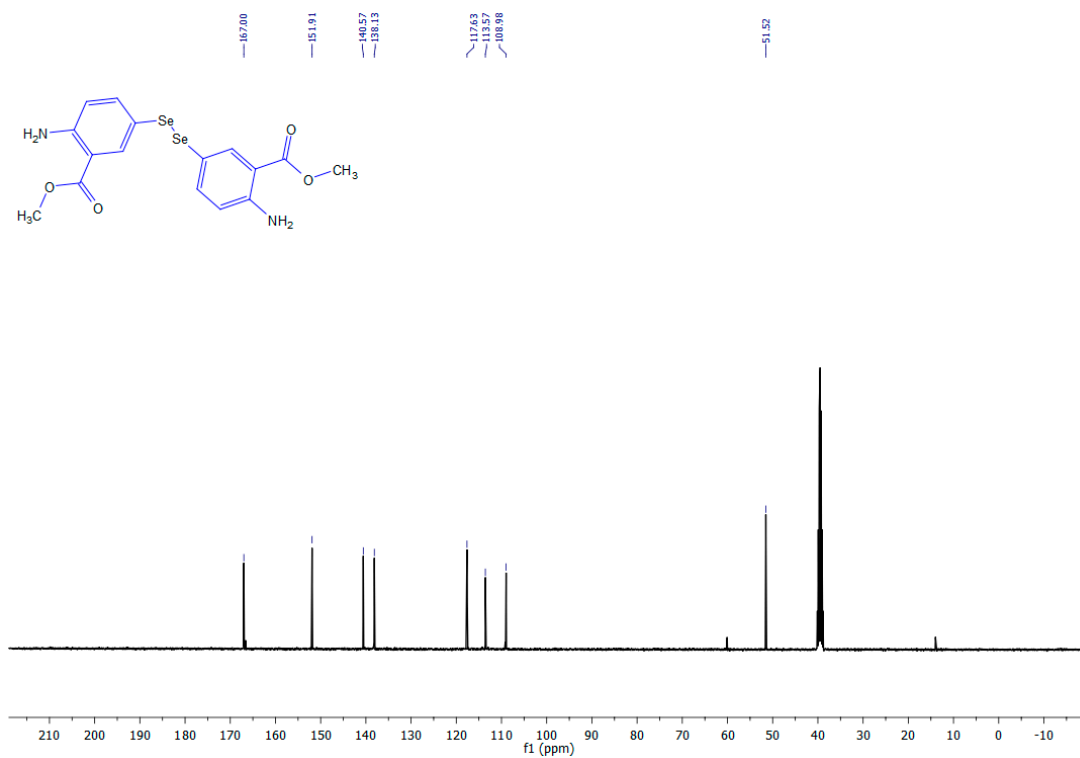

**Figure S6.** <sup>13</sup>C NMR chart of compound **5**

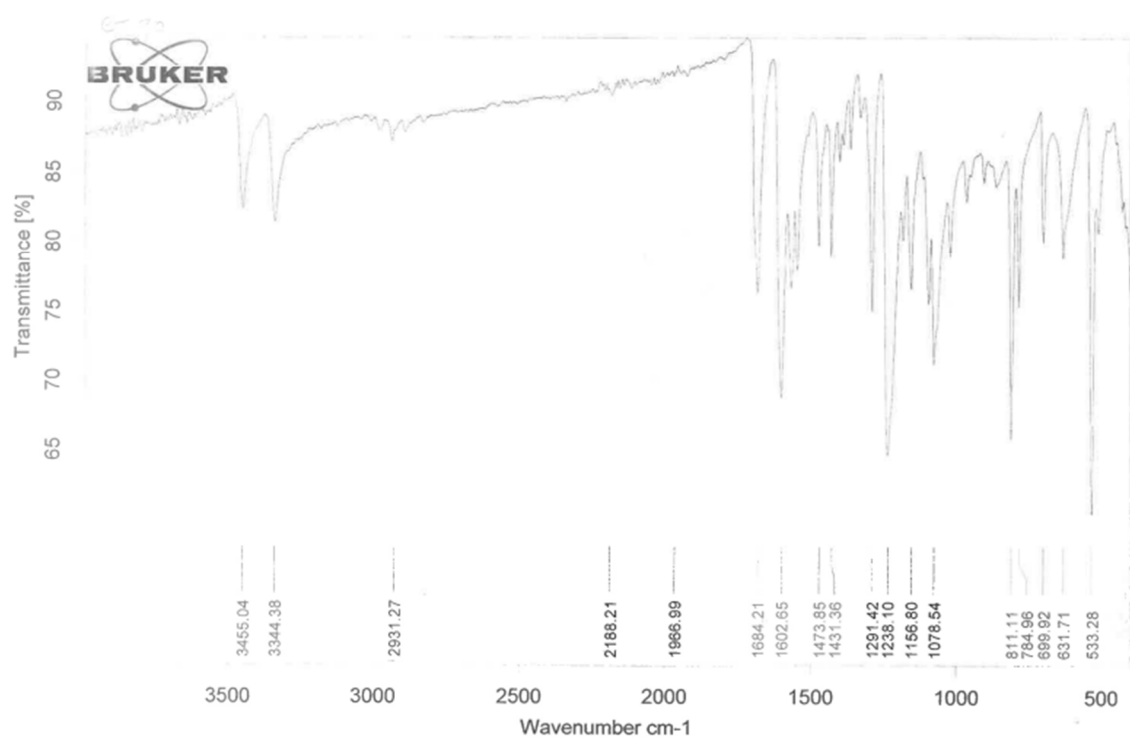

**Figure S7.** IR chart of compound **5**

# Cairo University Micro Analytical Center

## DI Analysis Shimadzu Qp-2010 Plus

Sample Information  
 Analyzed by : Dr. Mai Younis  
 Analyzed : 06/01/2007 07:17:06  
 Sample Name : B1  
 Sample ID :  
 Customer Name : Dr. Mohamed Soliman - Science - Cairo  
 Data File : C:\GCMSsolution\Data\Project1\B1.QGD  
 Org Data File : C:\GCMSsolution\Data\Project1\B1.QGD  
 Method File : C:\GCMSsolution\Data\Project1\High Temperature Op  
 Org Method File : C:\GCMSsolution\Data\Project1\High Temperature Op  
 Report File :  
 Tuning File : C:\GCMSsolution\System\Tune1\\_default.qgt  
 \$End1\$Modified by : Dr. Mai Younis  
 Modified : 06/01/2007 07:22:24

### Method

Analytical Line 1  
 IonSourceTemp : 250.00 °C  
 [MS Table]  
 --Group 1 - Event 1--  
 Start Time : 0.00min  
 End Time : 10.00min  
 ACQ Mode : Scan  
 Event Time : 0.50sec  
 Scan Speed : 1000  
 Start m/z : 50.00  
 End m/z : 510.00

Electron Voltage : 70 eV  
 Ionization Mode : EI

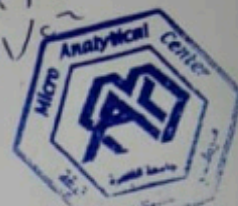

C:\GCMSsolution\Data\Project1\B1.QGD

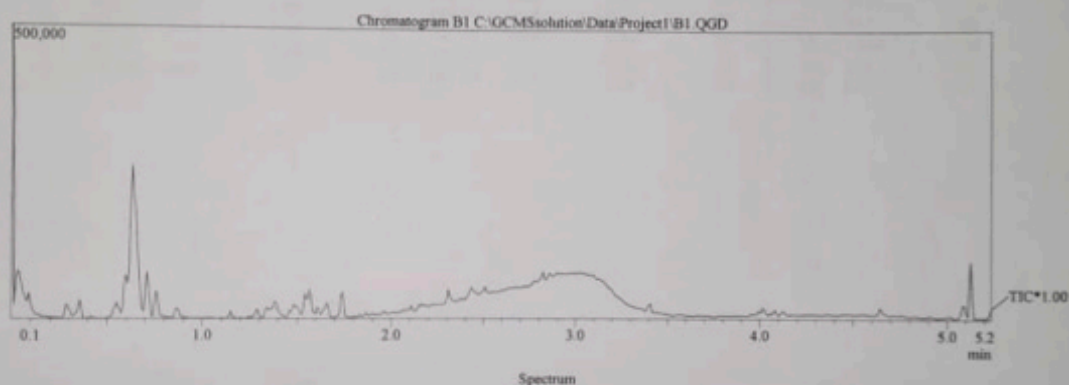

Line#1 R.Time:2.9(Scan#:352)

MassPeaks:90

RawMode:Single 2.9(352) BasePeak:91(10811)

BG Mode:None Group 1 - Event 1

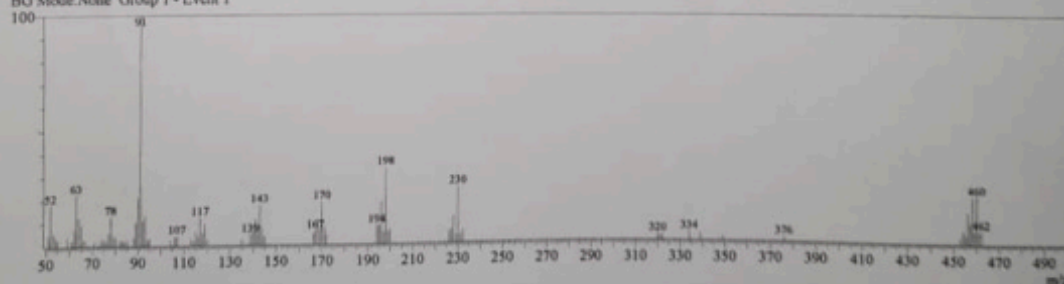

### Mass Table

Line#1 R.Time:2.9(Scan#:352)

MassPeaks:90

RawMode:Single 2.9(352) BasePeak:91(10811)

BG Mode:None Group 1 - Event 1

| # | m/z   | Abs. In | Rel. Int. | # | m/z   | Abs. In | Rel. Int. | # | m/z   | Abs. In | Rel. Int. |
|---|-------|---------|-----------|---|-------|---------|-----------|---|-------|---------|-----------|
| 1 | 51.05 | 519     | 4.80      | 4 | 54.05 | 471     | 4.36      | 7 | 61.00 | 255     | 2.36      |
| 2 | 51.95 | 1953    | 18.06     | 5 | 55.10 | 305     | 2.82      | 8 | 62.05 | 723     | 6.69      |
| 3 | 53.05 | 620     | 5.73      | 6 | 59.05 | 411     | 3.80      | 9 | 63.00 | 2398    | 22.18     |

Figure S8. Mass chart of compound 5

| #  | m/z    | Abs. In | Rel. Int. | #  | m/z    | Abs. In | Rel. Int. | #  | m/z    | Abs. In | Rel. Int. |
|----|--------|---------|-----------|----|--------|---------|-----------|----|--------|---------|-----------|
| 10 | 64.05  | 1311    | 12.13     | 37 | 113.00 | 308     | 2.85      | 64 | 198.00 | 3602    | 33.32     |
| 11 | 65.05  | 960     | 8.88      | 38 | 113.90 | 222     | 2.05      | 65 | 199.00 | 591     | 5.47      |
| 12 | 66.00  | 278     | 2.57      | 39 | 114.90 | 636     | 5.88      | 66 | 200.05 | 690     | 6.38      |
| 13 | 67.00  | 247     | 2.28      | 40 | 116.05 | 385     | 3.56      | 67 | 226.05 | 505     | 4.67      |
| 14 | 71.00  | 202     | 1.87      | 41 | 117.00 | 1319    | 12.20     | 68 | 227.05 | 655     | 6.06      |
| 15 | 74.00  | 313     | 2.90      | 42 | 118.05 | 599     | 5.54      | 69 | 228.00 | 1222    | 11.30     |
| 16 | 75.00  | 255     | 2.36      | 43 | 119.10 | 1022    | 9.45      | 70 | 229.15 | 316     | 2.92      |
| 17 | 76.00  | 214     | 1.98      | 44 | 120.10 | 310     | 2.87      | 71 | 230.05 | 2640    | 24.42     |
| 18 | 77.05  | 571     | 5.28      | 45 | 135.10 | 289     | 2.67      | 72 | 231.05 | 347     | 3.21      |
| 19 | 78.05  | 1366    | 12.64     | 46 | 139.00 | 482     | 4.46      | 73 | 232.05 | 594     | 5.49      |
| 20 | 79.10  | 466     | 4.31      | 47 | 140.00 | 614     | 5.68      | 74 | 320.00 | 290     | 2.68      |
| 21 | 80.10  | 388     | 3.59      | 48 | 141.05 | 1196    | 11.06     | 75 | 321.00 | 222     | 2.05      |
| 22 | 82.10  | 233     | 2.16      | 49 | 142.05 | 619     | 5.73      | 76 | 322.00 | 228     | 2.11      |
| 23 | 83.10  | 260     | 2.40      | 50 | 143.00 | 1894    | 17.52     | 77 | 334.00 | 398     | 3.68      |
| 24 | 84.10  | 220     | 2.03      | 51 | 144.00 | 850     | 7.86      | 78 | 339.00 | 318     | 2.94      |
| 25 | 85.10  | 278     | 2.57      | 52 | 144.95 | 409     | 3.78      | 79 | 349.00 | 230     | 2.13      |
| 26 | 88.05  | 377     | 3.49      | 53 | 166.05 | 493     | 4.56      | 80 | 376.00 | 215     | 1.99      |
| 27 | 89.05  | 1081    | 10.00     | 54 | 167.05 | 639     | 5.91      | 81 | 453.00 | 263     | 2.43      |
| 28 | 90.05  | 2287    | 21.15     | 55 | 168.05 | 1148    | 10.62     | 82 | 454.20 | 604     | 5.59      |
| 29 | 91.05  | 10811   | 100.00    | 56 | 169.15 | 688     | 6.36      | 83 | 455.20 | 425     | 3.93      |
| 30 | 92.05  | 1150    | 10.64     | 57 | 170.05 | 2031    | 18.79     | 84 | 456.25 | 1479    | 13.68     |
| 31 | 92.95  | 1429    | 13.22     | 58 | 171.10 | 802     | 7.42      | 85 | 457.20 | 1015    | 9.39      |
| 32 | 94.00  | 254     | 2.35      | 59 | 172.10 | 420     | 3.88      | 86 | 458.20 | 2169    | 20.06     |
| 33 | 95.00  | 354     | 3.27      | 60 | 194.05 | 863     | 7.98      | 87 | 459.15 | 562     | 5.20      |
| 34 | 104.00 | 249     | 2.30      | 61 | 195.05 | 858     | 7.94      | 88 | 460.15 | 2244    | 20.76     |
| 35 | 106.10 | 398     | 3.68      | 62 | 196.00 | 1993    | 18.43     | 89 | 461.15 | 521     | 4.82      |
| 36 | 107.00 | 444     | 4.11      | 63 | 197.05 | 575     | 5.32      | 90 | 462.10 | 618     | 5.72      |

Mass chart of compound 5

*Dimethyl 5,5'-diselanediyldis(2-(2-(1-cyano-2-ethoxy-2-oxoethylidene) hydrazinyl) benzoate) (6).*

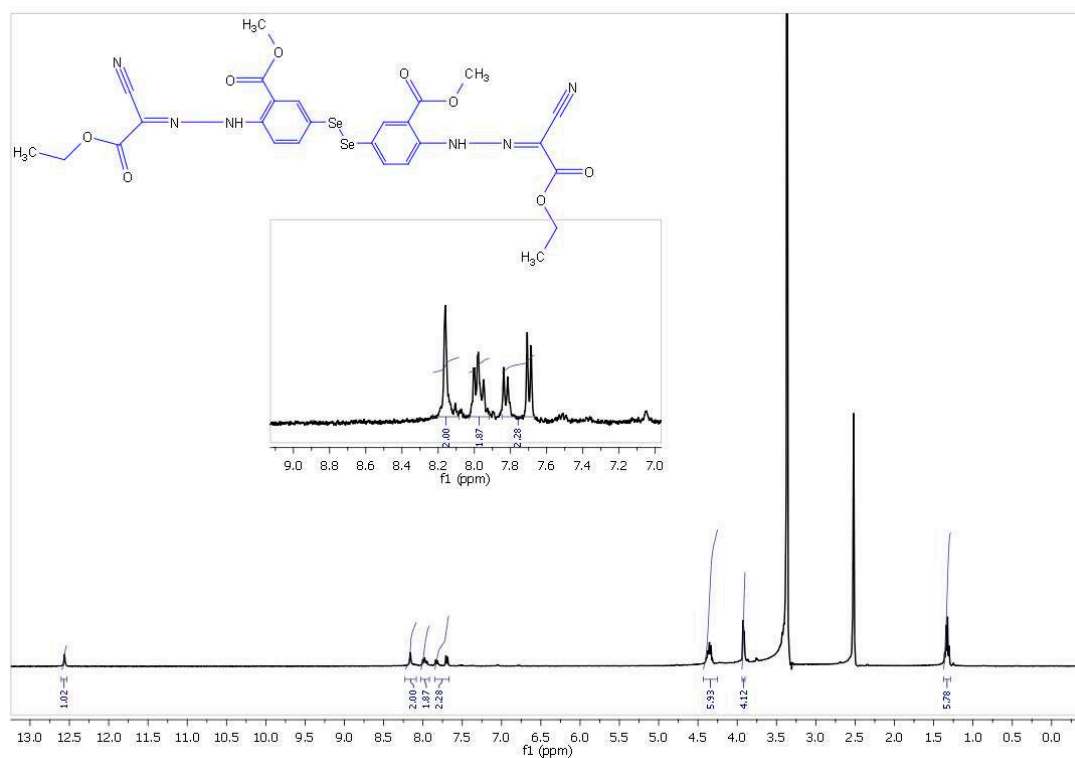

**Figure S9.** <sup>1</sup>H NMR chart of compound 6

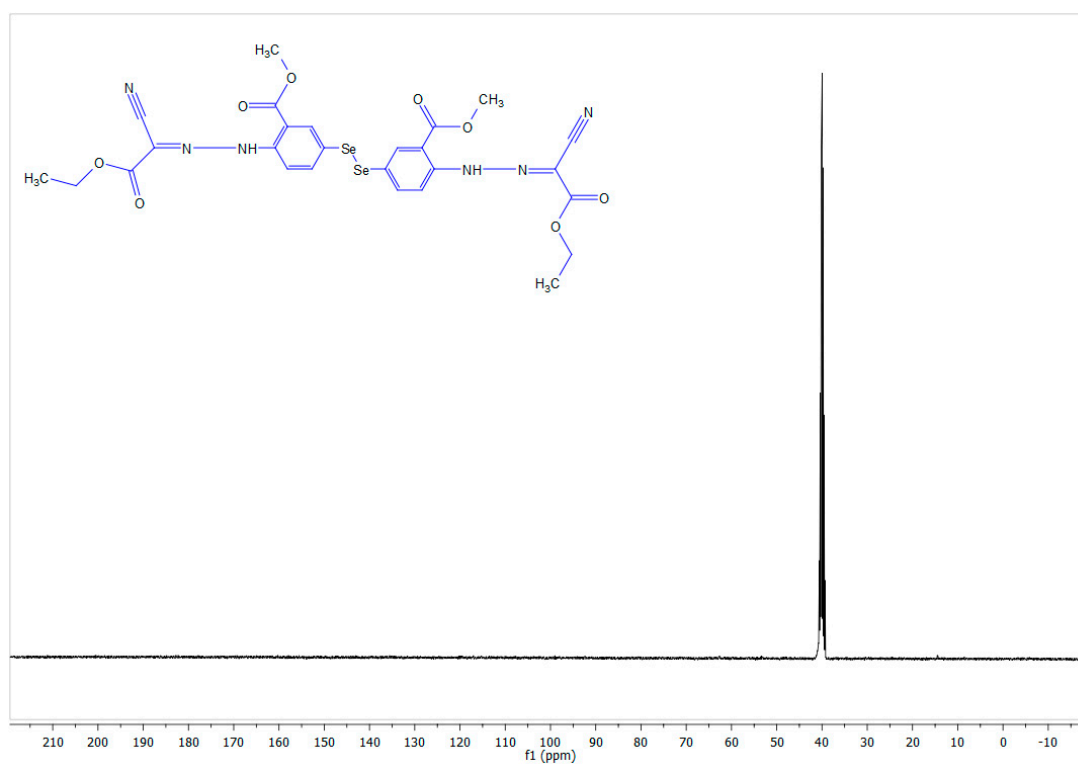

**Figure S10.** <sup>13</sup>C NMR chart of compound 6

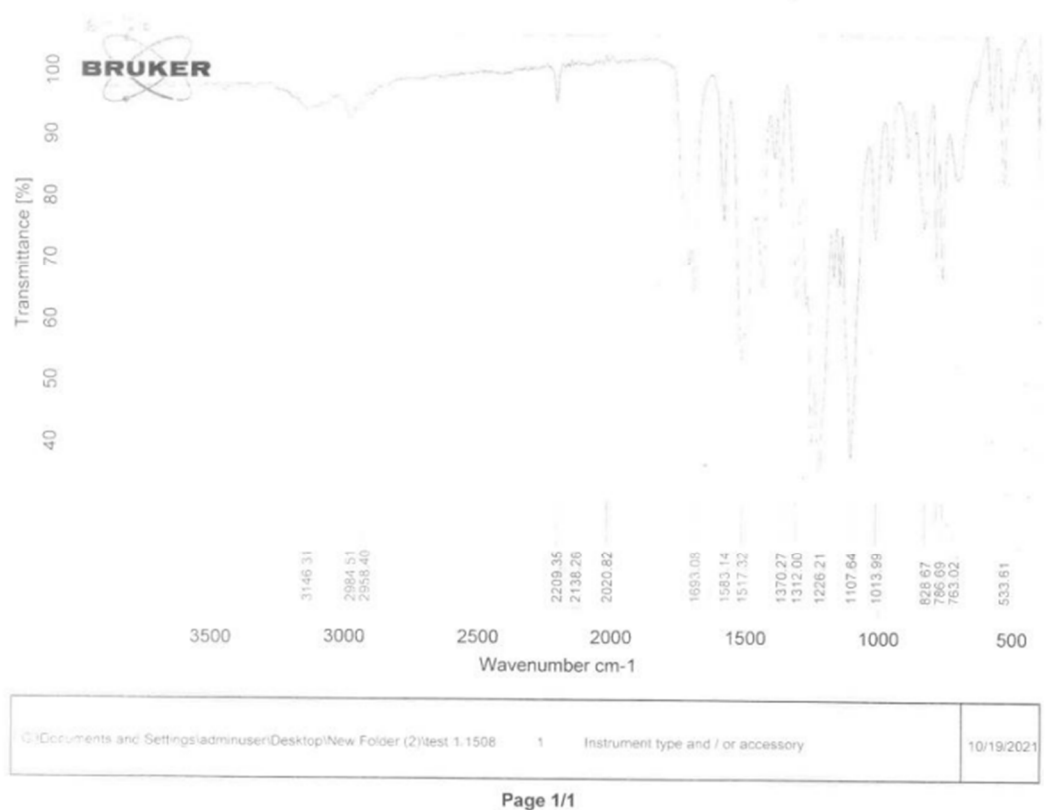

**Figure S11.** IR chart of compound **6**

# Cairo University Micro Analytical Center

DI Analysis  
Shimadzu Qp-2010 Plus

Sample Information  
Analyzed by : Dr. Mai Younis  
Analyzed : 10/01/2007 02:24:35  
Sample Name : B33  
Sample ID :  
Customer Name : Dr. Mohamed Soliman - Science - Cairo  
Data File : C:\GCMSolution\Data\Project1\B33.QGD  
Org Data File : C:\GCMSolution\Data\Project1\B33.QGD  
Method File : C:\GCMSolution\Data\Project1\High Temperature Op  
Org Method File : C:\GCMSolution\Data\Project1\High Temperature Op  
Report File :  
Tuning File : C:\GCMSolution\System1\Tune1\default.gcf  
SEndItSModified by : Dr. Mai Younis  
Modified : 10/01/2007 02:34:35

Method  
Analytical Line 1  
IonSourceTemp : 250.00 °C  
[MS Table]  
--Group 1 - Event 1--  
Start Time : 0.00min  
End Time : 10.00min  
ACQ Mode : Scan  
Event Time : 0.50sec  
Scan Speed : 2000  
Start m/z : 50.00  
End m/z : 1000.00  
Electron Voltage : 70 eV  
Ionization Mode : EI

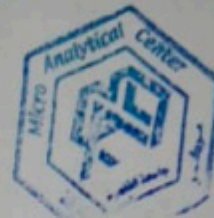

C:\GCMSolution\Data\Project1\B33.QGD

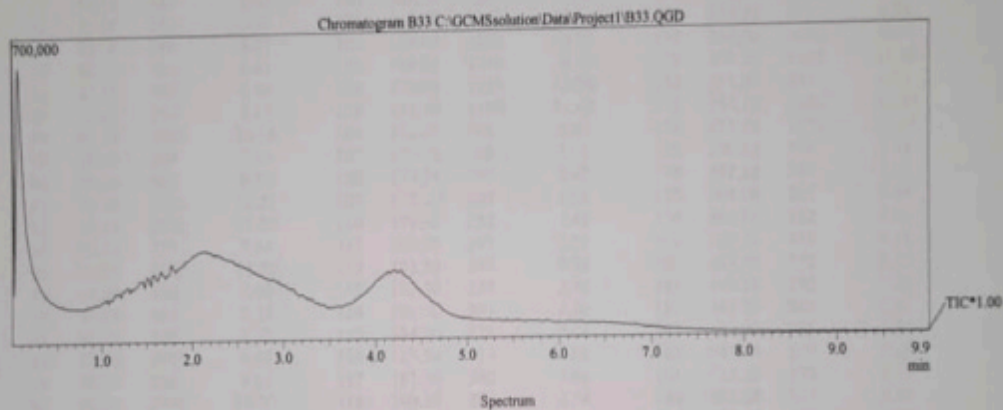

Line#1 R.Time:4.2(Scan#:507)  
MassPeaks:211  
RawMode:Single 4.2(507) BasePeak:59(10447)  
BG Mode:None Group 1 - Event 1

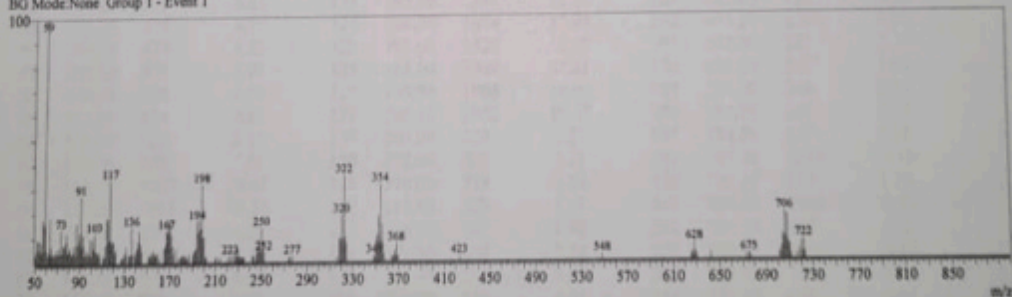

Mass Table

Line#1 R.Time:4.2(Scan#:507)

MassPeaks:211

RawMode:Single 4.2(507) BasePeak:59(10447)

BG Mode:None Group 1 - Event 1

| # | m/z   | Abs. In | Rel. Int. | # | m/z   | Abs. In | Rel. Int. | # | m/z   | Abs. In | Rel. Int. |
|---|-------|---------|-----------|---|-------|---------|-----------|---|-------|---------|-----------|
| 1 | 50.00 | 329     | 3.15      | 4 | 53.05 | 980     | 9.38      | 7 | 56.15 | 496     | 4.75      |
| 2 | 51.00 | 529     | 5.06      | 5 | 54.10 | 540     | 5.17      | 8 | 57.10 | 1842    | 17.63     |
| 3 | 52.05 | 996     | 9.53      | 6 | 55.10 | 874     | 8.37      | 9 | 58.15 | 1622    | 15.53     |

Figure S12. Mass chart of compound 6



| #  | m/z    | Abs. In | Rel. Int. | #   | m/z    | Abs. In | Rel. Int. | #   | m/z    | Abs. In | Rel. Int. |
|----|--------|---------|-----------|-----|--------|---------|-----------|-----|--------|---------|-----------|
| 10 | 59.10  | 10447   | 100.00    | 78  | 134.20 | 279     | 2.67      | 146 | 242.00 | 268     | 2.57      |
| 11 | 60.10  | 566     | 5.42      | 79  | 135.20 | 359     | 3.44      | 147 | 243.00 | 273     | 2.61      |
| 12 | 61.10  | 330     | 3.16      | 80  | 136.20 | 1486    | 14.22     | 148 | 244.00 | 226     | 2.16      |
| 13 | 62.15  | 462     | 4.42      | 81  | 137.20 | 401     | 3.84      | 149 | 246.00 | 378     | 3.62      |
| 14 | 63.05  | 1936    | 18.53     | 82  | 139.20 | 338     | 3.24      | 150 | 247.05 | 660     | 6.32      |
| 15 | 64.05  | 691     | 6.61      | 83  | 140.20 | 492     | 4.71      | 151 | 248.00 | 953     | 9.12      |
| 16 | 65.00  | 417     | 3.99      | 84  | 141.10 | 634     | 6.07      | 152 | 249.00 | 450     | 4.31      |
| 17 | 66.00  | 281     | 2.69      | 85  | 142.10 | 906     | 8.67      | 153 | 250.10 | 1441    | 13.79     |
| 18 | 67.00  | 425     | 4.07      | 86  | 143.10 | 1346    | 12.88     | 154 | 251.10 | 647     | 6.19      |
| 19 | 68.00  | 385     | 3.69      | 87  | 144.10 | 777     | 7.44      | 155 | 252.10 | 422     | 4.04      |
| 20 | 69.00  | 537     | 5.14      | 88  | 145.10 | 502     | 4.81      | 156 | 274.10 | 204     | 1.95      |
| 21 | 70.00  | 377     | 3.61      | 89  | 151.10 | 319     | 3.05      | 157 | 275.10 | 228     | 2.18      |
| 22 | 71.15  | 662     | 6.34      | 90  | 152.10 | 244     | 2.34      | 158 | 277.10 | 249     | 2.38      |
| 23 | 72.20  | 422     | 4.04      | 91  | 153.10 | 385     | 3.69      | 159 | 316.10 | 228     | 2.18      |
| 24 | 73.15  | 1417    | 13.56     | 92  | 154.10 | 290     | 2.78      | 160 | 318.15 | 975     | 9.33      |
| 25 | 74.20  | 433     | 4.14      | 93  | 155.10 | 521     | 4.99      | 161 | 319.20 | 961     | 9.20      |
| 26 | 75.15  | 775     | 7.42      | 94  | 156.10 | 439     | 4.20      | 162 | 320.15 | 1969    | 18.85     |
| 27 | 76.15  | 685     | 6.56      | 95  | 157.10 | 330     | 3.16      | 163 | 321.15 | 934     | 8.94      |
| 28 | 77.15  | 906     | 8.67      | 96  | 158.10 | 337     | 3.23      | 164 | 322.15 | 3662    | 35.05     |
| 29 | 78.10  | 1233    | 11.80     | 97  | 159.10 | 450     | 4.31      | 165 | 323.15 | 1044    | 9.99      |
| 30 | 79.10  | 426     | 4.08      | 98  | 161.10 | 228     | 2.18      | 166 | 324.15 | 786     | 7.52      |
| 31 | 80.10  | 537     | 5.14      | 99  | 165.10 | 594     | 5.69      | 167 | 348.20 | 209     | 2.00      |
| 32 | 81.10  | 692     | 6.62      | 100 | 166.05 | 758     | 7.26      | 168 | 349.20 | 246     | 2.35      |
| 33 | 82.10  | 382     | 3.66      | 101 | 167.10 | 1362    | 13.04     | 169 | 350.20 | 871     | 8.34      |
| 34 | 83.10  | 399     | 3.82      | 102 | 168.05 | 1263    | 12.09     | 170 | 351.20 | 1094    | 10.47     |
| 35 | 84.10  | 482     | 4.61      | 103 | 169.05 | 1748    | 16.73     | 171 | 352.20 | 1921    | 18.39     |
| 36 | 85.15  | 783     | 7.49      | 104 | 170.05 | 1649    | 15.78     | 172 | 353.20 | 847     | 8.11      |
| 37 | 86.10  | 330     | 3.16      | 105 | 171.10 | 1199    | 11.48     | 173 | 354.15 | 3270    | 31.30     |
| 38 | 87.15  | 1699    | 16.26     | 106 | 172.10 | 695     | 6.65      | 174 | 355.10 | 1572    | 15.05     |
| 39 | 88.10  | 769     | 7.36      | 107 | 173.10 | 388     | 3.71      | 175 | 356.10 | 774     | 7.41      |
| 40 | 89.10  | 980     | 9.38      | 108 | 175.25 | 592     | 5.67      | 176 | 357.10 | 340     | 3.25      |
| 41 | 90.10  | 1276    | 12.21     | 109 | 177.30 | 204     | 1.95      | 177 | 364.10 | 255     | 2.44      |
| 42 | 91.15  | 2828    | 27.07     | 110 | 179.30 | 252     | 2.41      | 178 | 365.10 | 212     | 2.03      |
| 43 | 92.15  | 777     | 7.44      | 111 | 180.30 | 241     | 2.31      | 179 | 366.10 | 450     | 4.31      |
| 44 | 93.05  | 1209    | 11.57     | 112 | 181.30 | 343     | 3.28      | 180 | 367.10 | 225     | 2.15      |
| 45 | 94.10  | 319     | 3.05      | 113 | 182.30 | 257     | 2.46      | 181 | 368.15 | 754     | 7.22      |
| 46 | 95.10  | 551     | 5.27      | 114 | 183.30 | 303     | 2.90      | 182 | 369.20 | 263     | 2.52      |
| 47 | 96.10  | 348     | 3.33      | 115 | 184.30 | 226     | 2.16      | 183 | 423.20 | 206     | 1.97      |
| 48 | 97.10  | 490     | 4.69      | 116 | 185.30 | 214     | 2.05      | 184 | 548.20 | 249     | 2.38      |
| 49 | 98.20  | 398     | 3.81      | 117 | 187.30 | 382     | 3.66      | 185 | 625.20 | 220     | 2.11      |
| 50 | 99.20  | 1076    | 10.30     | 118 | 190.30 | 286     | 2.74      | 186 | 626.20 | 353     | 3.38      |
| 51 | 100.10 | 311     | 2.98      | 119 | 191.05 | 450     | 4.31      | 187 | 627.20 | 215     | 2.06      |
| 52 | 101.15 | 959     | 9.18      | 120 | 192.00 | 542     | 5.19      | 188 | 628.20 | 698     | 6.68      |
| 53 | 102.10 | 604     | 5.78      | 121 | 193.05 | 579     | 5.54      | 189 | 629.20 | 330     | 3.16      |
| 54 | 103.20 | 1239    | 11.86     | 122 | 194.00 | 1745    | 16.70     | 190 | 630.20 | 218     | 2.09      |
| 55 | 104.20 | 503     | 4.81      | 123 | 195.05 | 1275    | 12.20     | 191 | 642.20 | 330     | 3.16      |
| 56 | 105.20 | 433     | 4.14      | 124 | 196.00 | 1874    | 17.94     | 192 | 673.20 | 206     | 1.97      |
| 57 | 106.20 | 452     | 4.33      | 125 | 197.00 | 1420    | 13.59     | 193 | 675.20 | 222     | 2.13      |
| 58 | 107.20 | 415     | 3.97      | 126 | 198.00 | 3302    | 31.61     | 194 | 676.20 | 207     | 1.98      |
| 59 | 108.20 | 262     | 2.51      | 127 | 198.95 | 1086    | 10.40     | 195 | 701.20 | 246     | 2.35      |
| 60 | 111.20 | 274     | 2.62      | 128 | 200.00 | 1052    | 10.07     | 196 | 702.20 | 369     | 3.53      |
| 61 | 112.20 | 222     | 2.13      | 129 | 201.00 | 263     | 2.52      | 197 | 703.20 | 535     | 5.12      |
| 62 | 113.15 | 745     | 7.13      | 130 | 202.00 | 222     | 2.13      | 198 | 704.30 | 1047    | 10.02     |
| 63 | 114.15 | 1923    | 18.41     | 131 | 210.00 | 239     | 2.29      | 199 | 705.25 | 915     | 8.76      |
| 64 | 115.20 | 1895    | 18.14     | 132 | 211.00 | 228     | 2.18      | 200 | 706.25 | 1965    | 18.81     |
| 65 | 116.20 | 954     | 9.13      | 133 | 214.00 | 207     | 1.98      | 201 | 707.20 | 922     | 8.83      |
| 66 | 117.20 | 3516    | 33.66     | 134 | 221.00 | 238     | 2.28      | 202 | 708.25 | 1884    | 18.03     |
| 67 | 118.10 | 900     | 8.61      | 135 | 223.00 | 278     | 2.66      | 203 | 709.20 | 700     | 6.70      |
| 68 | 119.15 | 949     | 9.08      | 136 | 225.00 | 314     | 3.01      | 204 | 710.20 | 633     | 6.06      |
| 69 | 120.20 | 860     | 8.23      | 137 | 227.00 | 249     | 2.38      | 205 | 711.20 | 220     | 2.11      |
| 70 | 121.20 | 434     | 4.15      | 138 | 228.00 | 490     | 4.69      | 206 | 716.20 | 204     | 1.95      |
| 71 | 122.05 | 597     | 5.71      | 139 | 229.00 | 241     | 2.31      | 207 | 718.20 | 380     | 3.64      |
| 72 | 127.10 | 218     | 2.09      | 140 | 230.00 | 551     | 5.27      | 208 | 720.25 | 751     | 7.19      |
| 73 | 128.10 | 217     | 2.08      | 141 | 231.00 | 249     | 2.38      | 209 | 721.30 | 298     | 2.85      |
| 74 | 129.10 | 209     | 2.00      | 142 | 232.00 | 241     | 2.31      | 210 | 722.25 | 806     | 7.72      |
| 75 | 130.10 | 414     | 3.96      | 143 | 233.00 | 201     | 1.92      | 211 | 723.30 | 319     | 3.05      |
| 76 | 131.20 | 686     | 6.57      | 144 | 234.00 | 218     | 2.09      |     |        |         |           |
| 77 | 133.20 | 353     | 3.38      | 145 | 235.00 | 210     | 2.01      |     |        |         |           |



*Dimethyl 5,5'-diselanediyldis(2-formamidobenzoate) (7).*

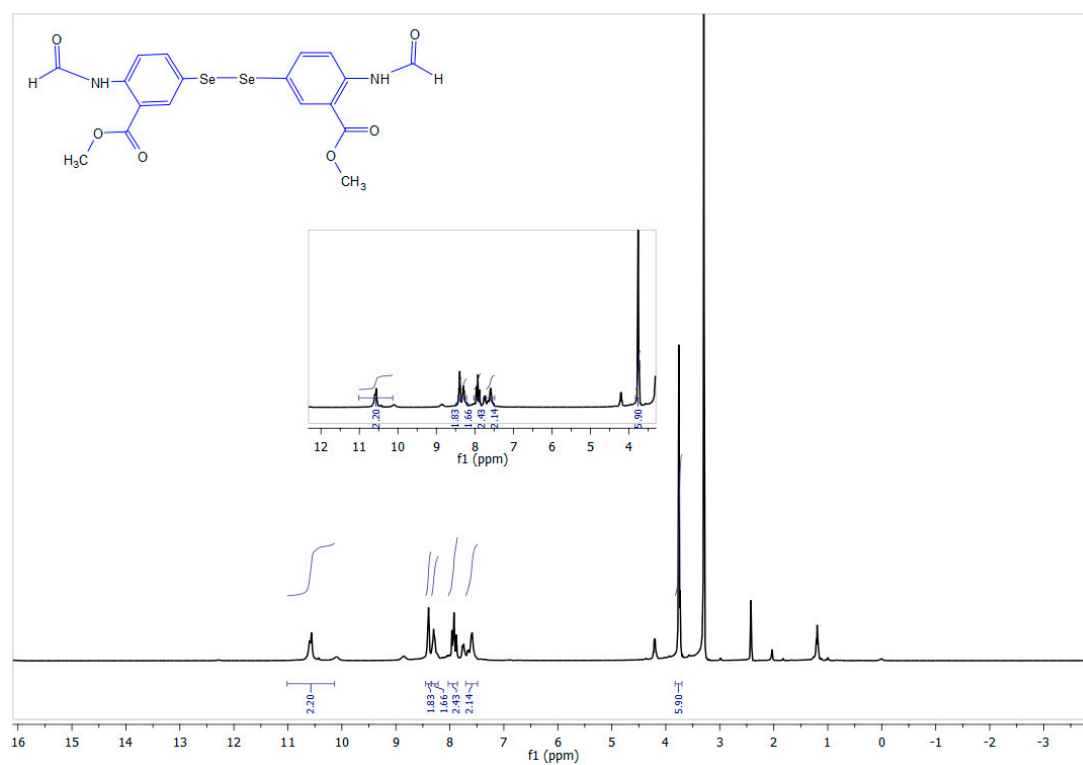

**Figure S13.** <sup>1</sup>H NMR chart of compound 7

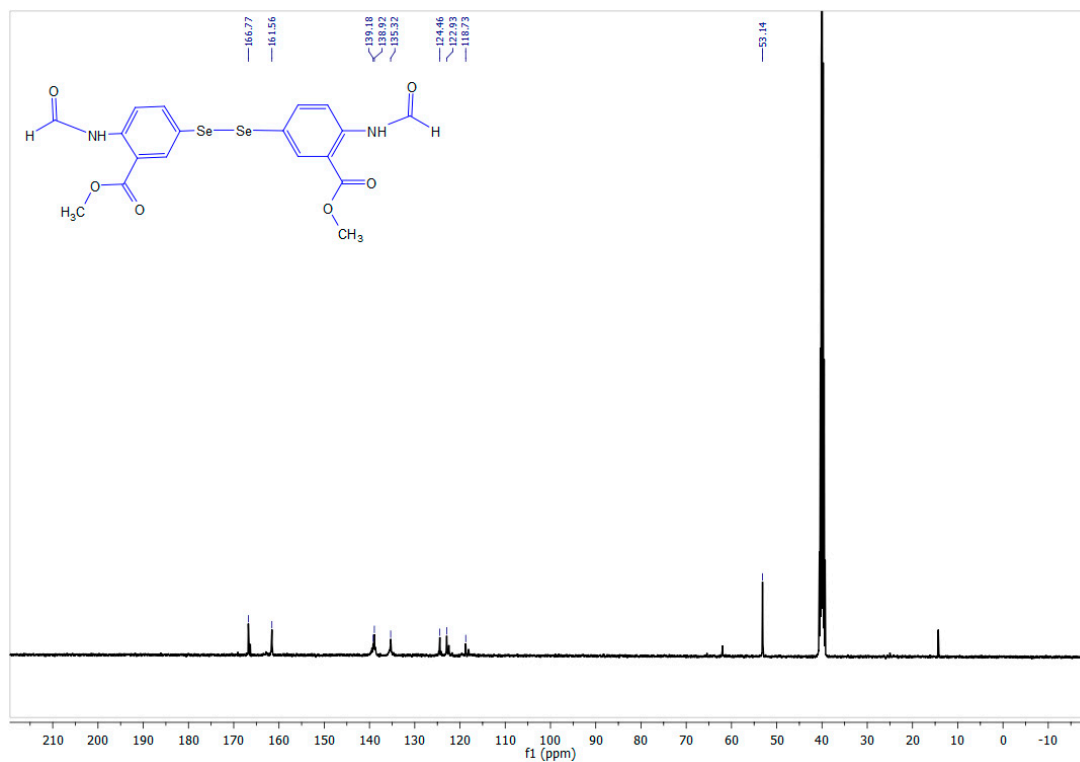

**Figure S14.** <sup>13</sup>C NMR chart of compound 7

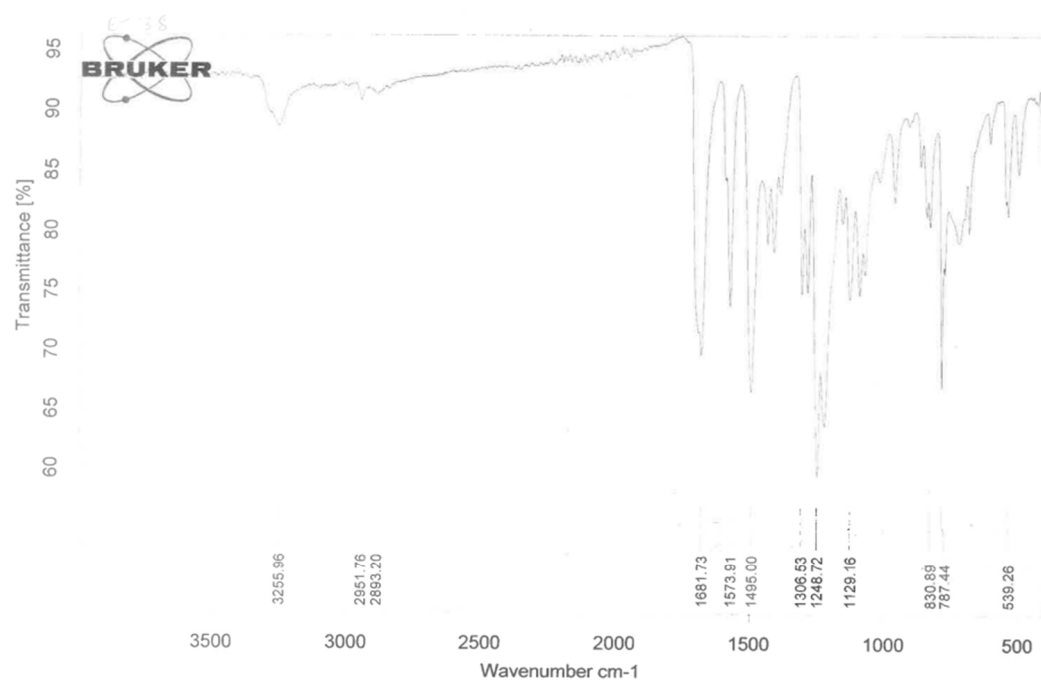

C:\Documents and Settings\adminuser\Desktop\New Folder (2)\test 1.1547

1

Instrument type and / or accessory

11/18/2021

Page 1/1

**Figure S15.** IR chart of compound **7**

**Cairo University  
Micro Analytical Center**

**DI Analysis  
Shimadzu Qp-2010 Plus**

Sample Information  
 Analyzed by : Dr. Mai Younis  
 Analyzed : 10/01/2007 03:21:04  
 Sample Name : B21  
 Sample ID :  
 Customer Name : Dr. Mohamed Soliman - Science - Cairo  
 Data File : C:\GCMSolution\Data\Project1\B21.QGD  
 Org Data File : C:\GCMSolution\Data\Project1\B21.QGD  
 Method File : C:\GCMSolution\Data\Project1\High Temperature Op  
 Org Method File : C:\GCMSolution\Data\Project1\High Temperature Op  
 Report File :  
 Tuning File : C:\GCMSolution\System\Tune1\_default.qgt  
 \$EndISModified by : Dr. Mai Younis  
 Modified : 10/01/2007 03:25:38

Method  
 Analytical Line 1  
 IonSourceTemp : 250.00 °C  
 [MS Table]  
 -Group 1 - Event 1-  
 Start Time : 0.00min  
 End Time : 10.00min  
 ACQ Mode : Scan  
 Event Time : 0.50sec  
 Scan Speed : 2000  
 Start m/z : 50.00  
 End m/z : 1000.00  
 Electron Voltage : 70 eV  
 Ionization Mode : EI

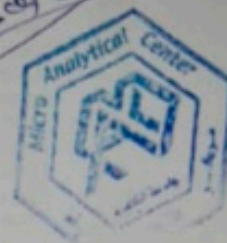

C:\GCMSolution\Data\Project1\B21.QGD

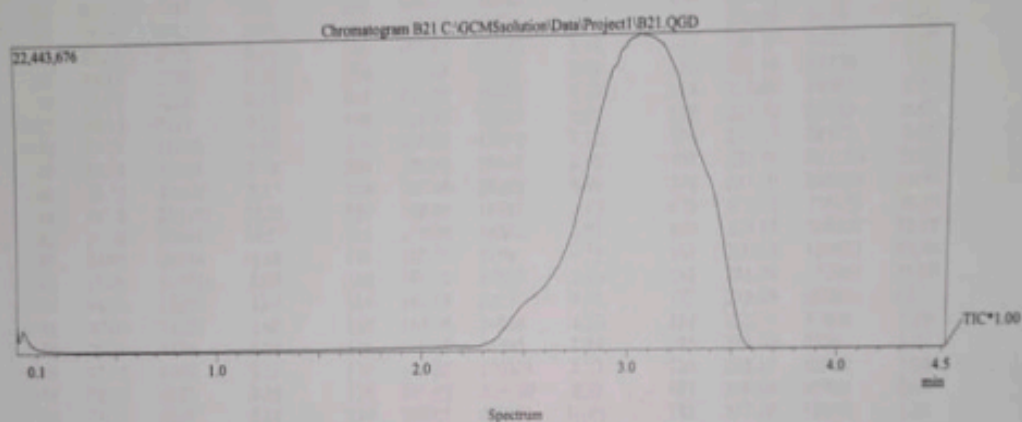

Line# 1 R.Time:3.1(Scan# 377)

MassPeaks:570

RawMode:Single 3.1(377) BasePeak:198(1464969)

BG Mode:None Group 1 - Event 1

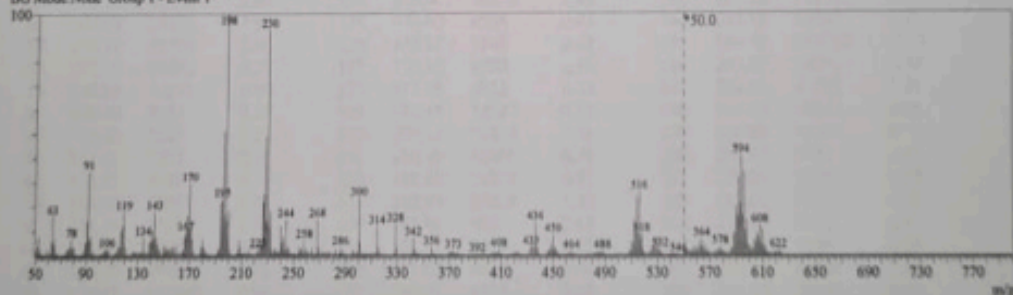

Mass Table

Line# 1 R.Time:3.1(Scan# 377)

MassPeaks:570

RawMode:Single 3.1(377) BasePeak:198(1464969)

BG Mode:None Group 1 - Event 1

| # | m/z   | Abs. In | Rel. Int. | # | m/z   | Abs. In | Rel. Int. | # | m/z   | Abs. In | Rel. Int. |
|---|-------|---------|-----------|---|-------|---------|-----------|---|-------|---------|-----------|
| 1 | 50.05 | 24594   | 1.68      | 4 | 53.05 | 42252   | 2.88      | 7 | 56.05 | 3027    | 0.21      |
| 2 | 51.05 | 55368   | 3.78      | 5 | 54.05 | 20407   | 1.39      | 8 | 57.05 | 6534    | 0.45      |
| 3 | 52.05 | 116377  | 7.94      | 6 | 55.05 | 9644    | 0.66      | 9 | 58.05 | 9131    | 0.62      |

**Figure S16. Mass chart of compound 7**

| #  | m/z    | Abs. Int. | Rel. Int. | #   | m/z    | Abs. Int. | Rel. Int. | #   | m/z    | Abs. Int. | Rel. Int. |
|----|--------|-----------|-----------|-----|--------|-----------|-----------|-----|--------|-----------|-----------|
| 10 | 59.00  | 36338     | 2.48      | 79  | 128.10 | 19204     | 1.31      | 148 | 197.05 | 239788    | 16.37     |
| 11 | 60.15  | 5776      | 0.39      | 80  | 129.15 | 18863     | 1.29      | 149 | 198.00 | 246496    | 16.37     |
| 12 | 61.15  | 23145     | 1.58      | 81  | 130.10 | 24905     | 1.70      | 150 | 198.95 | 206870    | 14.12     |
| 13 | 62.15  | 80056     | 5.46      | 82  | 131.15 | 15227     | 1.04      | 151 | 200.00 | 265948    | 18.15     |
| 14 | 63.05  | 234780    | 16.03     | 83  | 132.15 | 15925     | 1.09      | 152 | 200.95 | 33569     | 2.29      |
| 15 | 64.05  | 103512    | 7.07      | 84  | 133.25 | 21682     | 1.48      | 153 | 201.95 | 4387      | 0.30      |
| 16 | 65.05  | 62224     | 4.25      | 85  | 134.20 | 108370    | 7.40      | 154 | 203.10 | 2042      | 0.14      |
| 17 | 66.05  | 17090     | 1.17      | 86  | 135.15 | 35114     | 2.40      | 155 | 204.10 | 2559      | 0.17      |
| 18 | 67.05  | 10927     | 0.75      | 87  | 136.05 | 8126      | 0.55      | 156 | 205.05 | 3675      | 0.25      |
| 19 | 68.05  | 5612      | 0.38      | 88  | 137.05 | 12597     | 0.86      | 157 | 206.15 | 7640      | 0.52      |
| 20 | 69.05  | 6453      | 0.44      | 89  | 138.05 | 18067     | 1.23      | 158 | 207.15 | 34027     | 2.32      |
| 21 | 70.10  | 2214      | 0.15      | 90  | 139.05 | 70881     | 4.84      | 159 | 208.15 | 96895     | 6.61      |
| 22 | 71.10  | 4134      | 0.28      | 91  | 140.05 | 87187     | 5.95      | 160 | 209.10 | 55556     | 3.79      |
| 23 | 72.05  | 2060      | 0.14      | 92  | 141.05 | 150661    | 10.28     | 161 | 210.10 | 18156     | 1.24      |
| 24 | 73.05  | 9461      | 0.65      | 93  | 142.05 | 98499     | 6.72      | 162 | 211.05 | 7541      | 0.51      |
| 25 | 74.05  | 27743     | 1.89      | 94  | 143.05 | 262806    | 17.94     | 163 | 212.05 | 12728     | 0.87      |
| 26 | 75.05  | 39024     | 2.66      | 95  | 144.05 | 107906    | 7.37      | 164 | 213.05 | 10172     | 0.69      |
| 27 | 76.05  | 47488     | 3.24      | 96  | 145.05 | 69056     | 4.71      | 165 | 214.05 | 17585     | 1.20      |
| 28 | 77.05  | 52825     | 3.61      | 97  | 146.10 | 44022     | 3.00      | 166 | 215.05 | 5925      | 0.40      |
| 29 | 78.05  | 96196     | 6.57      | 98  | 147.10 | 34598     | 2.36      | 167 | 216.05 | 32339     | 2.21      |
| 30 | 79.05  | 41615     | 2.84      | 99  | 148.10 | 8207      | 0.56      | 168 | 216.95 | 6128      | 0.42      |
| 31 | 79.95  | 52962     | 3.62      | 100 | 149.25 | 11918     | 0.81      | 169 | 218.05 | 8970      | 0.61      |
| 32 | 81.05  | 7497      | 0.51      | 101 | 150.15 | 58987     | 4.03      | 170 | 219.05 | 4734      | 0.32      |
| 33 | 82.00  | 8503      | 0.58      | 102 | 151.15 | 51884     | 3.54      | 171 | 220.05 | 4698      | 0.32      |
| 34 | 83.15  | 4730      | 0.32      | 103 | 151.95 | 28210     | 1.93      | 172 | 221.10 | 11732     | 0.80      |
| 35 | 84.15  | 3783      | 0.26      | 104 | 152.95 | 38175     | 2.61      | 173 | 222.10 | 15578     | 1.06      |
| 36 | 85.15  | 5226      | 0.36      | 105 | 153.95 | 45823     | 3.13      | 174 | 223.05 | 34599     | 2.36      |
| 37 | 86.15  | 3311      | 0.23      | 106 | 154.95 | 28497     | 1.95      | 175 | 224.10 | 53783     | 3.67      |
| 38 | 87.15  | 11655     | 0.80      | 107 | 155.95 | 47292     | 3.23      | 176 | 225.15 | 88572     | 6.05      |
| 39 | 88.15  | 34322     | 2.34      | 108 | 156.95 | 39418     | 2.69      | 177 | 226.10 | 317178    | 21.65     |
| 40 | 89.15  | 80966     | 5.53      | 109 | 157.90 | 58238     | 3.98      | 178 | 227.10 | 365674    | 24.96     |
| 41 | 90.15  | 208182    | 14.21     | 110 | 158.95 | 16555     | 1.13      | 179 | 228.05 | 716179    | 48.89     |
| 42 | 91.05  | 506455    | 34.57     | 111 | 159.90 | 54662     | 3.73      | 180 | 229.15 | 204352    | 13.95     |
| 43 | 92.05  | 91654     | 6.26      | 112 | 160.95 | 5109      | 0.35      | 181 | 230.05 | 136627    | 93.26     |
| 44 | 93.00  | 117914    | 8.05      | 113 | 161.90 | 16975     | 1.16      | 182 | 231.05 | 171303    | 11.69     |
| 45 | 94.05  | 15285     | 1.04      | 114 | 163.05 | 5277      | 0.36      | 183 | 232.05 | 267631    | 18.27     |
| 46 | 95.00  | 24652     | 1.68      | 115 | 164.05 | 24885     | 1.70      | 184 | 232.95 | 37429     | 2.55      |
| 47 | 96.05  | 4228      | 0.29      | 116 | 165.05 | 34245     | 2.34      | 185 | 234.10 | 18561     | 1.27      |
| 48 | 97.15  | 4299      | 0.29      | 117 | 166.05 | 110381    | 7.53      | 186 | 235.15 | 28389     | 1.94      |
| 49 | 98.15  | 3622      | 0.25      | 118 | 167.05 | 136789    | 9.34      | 187 | 236.15 | 45786     | 3.13      |
| 50 | 99.10  | 3818      | 0.26      | 119 | 168.05 | 240735    | 16.43     | 188 | 237.15 | 18519     | 1.26      |
| 51 | 100.15 | 3684      | 0.25      | 120 | 169.05 | 157134    | 10.73     | 189 | 238.15 | 14271     | 0.97      |
| 52 | 101.15 | 8551      | 0.58      | 121 | 170.05 | 431966    | 29.49     | 190 | 239.25 | 26021     | 1.78      |
| 53 | 102.10 | 11721     | 0.80      | 122 | 171.05 | 149906    | 10.23     | 191 | 240.15 | 176287    | 12.03     |
| 54 | 103.15 | 20032     | 1.37      | 123 | 172.00 | 101633    | 6.94      | 192 | 241.15 | 82697     | 5.64      |
| 55 | 104.15 | 38808     | 2.65      | 124 | 173.00 | 28470     | 1.94      | 193 | 242.10 | 113735    | 7.76      |
| 56 | 105.05 | 27074     | 1.85      | 125 | 174.00 | 6508      | 0.44      | 194 | 243.15 | 32347     | 2.21      |
| 57 | 106.10 | 38996     | 2.66      | 126 | 175.15 | 1968      | 0.13      | 195 | 244.10 | 213769    | 14.59     |
| 58 | 107.10 | 33393     | 2.28      | 127 | 176.15 | 1458      | 0.10      | 196 | 245.05 | 34991     | 2.39      |
| 59 | 108.05 | 10011     | 0.68      | 128 | 177.15 | 3821      | 0.26      | 197 | 246.05 | 47288     | 3.23      |
| 60 | 109.10 | 4231      | 0.29      | 129 | 178.15 | 12523     | 0.85      | 198 | 247.05 | 13842     | 0.94      |
| 61 | 110.10 | 3010      | 0.21      | 130 | 179.15 | 51078     | 3.49      | 199 | 248.00 | 11108     | 0.76      |
| 62 | 111.10 | 5324      | 0.36      | 131 | 180.15 | 92866     | 6.34      | 200 | 249.05 | 9182      | 0.63      |
| 63 | 112.15 | 5457      | 0.37      | 132 | 181.15 | 50767     | 3.47      | 201 | 250.05 | 12407     | 0.85      |
| 64 | 113.10 | 19951     | 1.36      | 133 | 182.10 | 28319     | 1.93      | 202 | 251.00 | 9151      | 0.62      |
| 65 | 114.10 | 27367     | 1.87      | 134 | 183.05 | 9951      | 0.68      | 203 | 252.15 | 6532      | 0.45      |
| 66 | 115.05 | 56985     | 3.89      | 135 | 184.05 | 7677      | 0.52      | 204 | 253.25 | 7790      | 0.53      |
| 67 | 116.15 | 48386     | 3.30      | 136 | 185.05 | 4424      | 0.30      | 205 | 254.15 | 46608     | 3.18      |
| 68 | 117.05 | 145589    | 9.94      | 137 | 186.05 | 4173      | 0.28      | 206 | 255.10 | 29241     | 2.00      |
| 69 | 118.15 | 175690    | 11.99     | 138 | 187.05 | 2929      | 0.20      | 207 | 256.05 | 47888     | 3.27      |
| 70 | 119.10 | 263689    | 18.00     | 139 | 188.05 | 2012      | 0.14      | 208 | 257.15 | 25607     | 1.75      |
| 71 | 120.10 | 55866     | 3.81      | 140 | 189.05 | 2466      | 0.17      | 209 | 258.10 | 89121     | 6.08      |
| 72 | 121.10 | 10935     | 0.75      | 141 | 190.05 | 3154      | 0.22      | 210 | 259.05 | 36516     | 2.49      |
| 73 | 122.15 | 5648      | 0.39      | 142 | 191.05 | 6704      | 0.46      | 211 | 260.10 | 35807     | 2.44      |
| 74 | 123.15 | 4246      | 0.29      | 143 | 192.05 | 33178     | 2.26      | 212 | 261.10 | 17399     | 1.19      |
| 75 | 124.15 | 3163      | 0.22      | 144 | 193.05 | 42554     | 2.90      | 213 | 262.15 | 10618     | 0.72      |
| 76 | 125.15 | 9613      | 0.66      | 145 | 194.05 | 314135    | 21.44     | 214 | 263.20 | 21540     | 1.47      |
| 77 | 126.15 | 19499     | 1.33      | 146 | 195.05 | 336790    | 22.99     | 215 | 264.15 | 48109     | 3.28      |
| 78 | 127.15 | 34671     | 2.37      | 147 | 196.00 | 746338    | 50.95     | 216 | 265.15 | 11512     | 0.79      |



| #   | m/z    | Abs. Int. | Rel. Int. | #   | m/z    | Abs. Int. | Rel. Int. | #   | m/z    | Abs. Int. | Rel. Int. |
|-----|--------|-----------|-----------|-----|--------|-----------|-----------|-----|--------|-----------|-----------|
| 217 | 266.20 | 5574      | 0.38      | 286 | 335.05 | 4966      | 0.34      | 355 | 405.20 | 11647     | 0.80      |
| 218 | 267.25 | 18289     | 1.25      | 287 | 336.00 | 10442     | 0.71      | 356 | 406.20 | 19190     | 1.31      |
| 219 | 268.20 | 214457    | 14.64     | 288 | 337.05 | 3758      | 0.26      | 357 | 407.25 | 7865      | 0.54      |
| 220 | 269.15 | 50722     | 3.46      | 289 | 338.00 | 11316     | 0.77      | 358 | 408.20 | 34479     | 2.35      |
| 221 | 270.05 | 18993     | 1.30      | 290 | 339.20 | 3492      | 0.24      | 359 | 409.15 | 9079      | 0.62      |
| 222 | 271.15 | 8270      | 0.56      | 291 | 340.15 | 5991      | 0.41      | 360 | 410.15 | 7270      | 0.50      |
| 223 | 272.10 | 22950     | 1.57      | 292 | 341.25 | 11436     | 0.78      | 361 | 411.10 | 1921      | 0.13      |
| 224 | 273.05 | 12189     | 0.83      | 293 | 342.25 | 102667    | 7.01      | 362 | 412.15 | 716       | 0.05      |
| 225 | 274.00 | 18033     | 1.23      | 294 | 343.15 | 33975     | 2.32      | 363 | 413.15 | 1117      | 0.08      |
| 226 | 275.00 | 12638     | 0.86      | 295 | 344.05 | 11641     | 0.79      | 364 | 414.15 | 977       | 0.07      |
| 227 | 276.00 | 23305     | 1.59      | 296 | 345.10 | 14649     | 1.00      | 365 | 415.15 | 2414      | 0.16      |
| 228 | 277.05 | 10220     | 0.70      | 297 | 346.10 | 6401      | 0.44      | 366 | 416.25 | 1818      | 0.12      |
| 229 | 277.95 | 26831     | 1.83      | 298 | 347.05 | 4322      | 0.30      | 367 | 417.20 | 4686      | 0.32      |
| 230 | 278.95 | 7502      | 0.51      | 299 | 348.10 | 6097      | 0.42      | 368 | 418.20 | 6340      | 0.43      |
| 231 | 280.00 | 12959     | 0.88      | 300 | 349.05 | 2676      | 0.18      | 369 | 419.20 | 8022      | 0.55      |
| 232 | 281.25 | 7089      | 0.48      | 301 | 350.05 | 3422      | 0.23      | 370 | 420.20 | 12442     | 0.85      |
| 233 | 282.20 | 36882     | 2.52      | 302 | 351.15 | 2694      | 0.18      | 371 | 421.20 | 9254      | 0.63      |
| 234 | 283.15 | 11288     | 0.77      | 303 | 352.05 | 3204      | 0.22      | 372 | 422.20 | 23462     | 1.60      |
| 235 | 284.15 | 6929      | 0.47      | 304 | 353.10 | 3617      | 0.25      | 373 | 423.05 | 12365     | 0.84      |
| 236 | 285.25 | 10309     | 0.70      | 305 | 354.25 | 2467      | 0.17      | 374 | 424.05 | 7087      | 0.48      |
| 237 | 286.20 | 47882     | 3.27      | 306 | 355.25 | 7315      | 0.50      | 375 | 425.05 | 8548      | 0.58      |
| 238 | 287.05 | 19396     | 1.32      | 307 | 356.25 | 46877     | 3.20      | 376 | 426.00 | 2537      | 0.17      |
| 239 | 288.05 | 16595     | 1.13      | 308 | 357.15 | 13638     | 0.93      | 377 | 427.05 | 3033      | 0.21      |
| 240 | 289.05 | 13257     | 0.90      | 309 | 358.15 | 3305      | 0.23      | 378 | 428.05 | 1265      | 0.09      |
| 241 | 290.05 | 6268      | 0.43      | 310 | 359.10 | 1993      | 0.14      | 379 | 429.15 | 1679      | 0.11      |
| 242 | 291.10 | 4498      | 0.31      | 311 | 360.15 | 1330      | 0.09      | 380 | 430.15 | 4607      | 0.31      |
| 243 | 292.15 | 2391      | 0.16      | 312 | 361.15 | 1094      | 0.07      | 381 | 431.15 | 5087      | 0.35      |
| 244 | 293.15 | 3914      | 0.27      | 313 | 362.15 | 1676      | 0.11      | 382 | 432.15 | 37770     | 2.58      |
| 245 | 294.25 | 4362      | 0.30      | 314 | 363.05 | 962       | 0.07      | 383 | 433.15 | 47768     | 3.26      |
| 246 | 295.20 | 20102     | 1.37      | 315 | 364.15 | 1081      | 0.07      | 384 | 434.15 | 101178    | 6.91      |
| 247 | 296.15 | 27404     | 1.87      | 316 | 365.15 | 869       | 0.06      | 385 | 435.25 | 43189     | 2.95      |
| 248 | 297.15 | 7767      | 0.53      | 317 | 366.15 | 796       | 0.05      | 386 | 436.20 | 196380    | 13.41     |
| 249 | 298.25 | 4513      | 0.31      | 318 | 367.25 | 2136      | 0.15      | 387 | 437.10 | 54367     | 3.71      |
| 250 | 299.25 | 26163     | 1.79      | 319 | 368.25 | 2672      | 0.18      | 388 | 438.15 | 42121     | 2.88      |
| 251 | 300.20 | 341862    | 23.34     | 320 | 369.20 | 8393      | 0.57      | 389 | 439.10 | 11220     | 0.77      |
| 252 | 301.15 | 78463     | 5.36      | 321 | 370.25 | 23395     | 1.60      | 390 | 440.05 | 2091      | 0.14      |
| 253 | 302.15 | 15487     | 1.06      | 322 | 371.15 | 19186     | 1.31      | 391 | 441.10 | 658       | 0.04      |
| 254 | 303.15 | 5962      | 0.41      | 323 | 372.15 | 9747      | 0.67      | 392 | 442.15 | 451       | 0.03      |
| 255 | 304.00 | 9417      | 0.64      | 324 | 373.10 | 26022     | 1.78      | 393 | 443.25 | 974       | 0.07      |
| 256 | 305.00 | 6111      | 0.42      | 325 | 374.10 | 12108     | 0.83      | 394 | 444.20 | 3310      | 0.23      |
| 257 | 306.00 | 11102     | 0.76      | 326 | 375.15 | 10231     | 0.70      | 395 | 445.25 | 4151      | 0.28      |
| 258 | 307.00 | 6762      | 0.46      | 327 | 376.15 | 15771     | 1.08      | 396 | 446.20 | 25433     | 1.74      |
| 259 | 308.00 | 10218     | 0.70      | 328 | 377.10 | 5465      | 0.37      | 397 | 447.20 | 31066     | 2.12      |
| 260 | 309.05 | 8278      | 0.57      | 329 | 378.15 | 4515      | 0.31      | 398 | 448.20 | 64380     | 4.39      |
| 261 | 310.05 | 14253     | 0.97      | 330 | 379.15 | 1506      | 0.10      | 399 | 449.25 | 34343     | 2.34      |
| 262 | 311.20 | 4722      | 0.32      | 331 | 380.20 | 1839      | 0.13      | 400 | 450.20 | 122422    | 8.36      |
| 263 | 312.15 | 8322      | 0.57      | 332 | 381.20 | 630       | 0.04      | 401 | 451.10 | 48983     | 3.34      |
| 264 | 313.25 | 18558     | 1.27      | 333 | 382.35 | 803       | 0.05      | 402 | 452.15 | 32570     | 2.22      |
| 265 | 314.20 | 172178    | 11.75     | 334 | 383.35 | 1024      | 0.07      | 403 | 453.15 | 21234     | 1.45      |
| 266 | 315.15 | 47455     | 3.24      | 335 | 384.30 | 3825      | 0.26      | 404 | 454.00 | 6215      | 0.42      |
| 267 | 316.00 | 20338     | 1.39      | 336 | 385.25 | 2413      | 0.16      | 405 | 455.05 | 5959      | 0.41      |
| 268 | 317.00 | 9206      | 0.63      | 337 | 386.75 | 2422      | 0.17      | 406 | 456.05 | 3265      | 0.22      |
| 269 | 318.00 | 8063      | 0.55      | 338 | 387.65 | 2694      | 0.18      | 407 | 457.10 | 2191      | 0.15      |
| 270 | 319.05 | 4177      | 0.29      | 339 | 388.75 | 2477      | 0.17      | 408 | 458.10 | 2047      | 0.14      |
| 271 | 320.00 | 6754      | 0.46      | 340 | 389.75 | 4577      | 0.31      | 409 | 459.15 | 1616      | 0.11      |
| 272 | 321.10 | 3839      | 0.26      | 341 | 390.65 | 4336      | 0.30      | 410 | 460.20 | 6214      | 0.42      |
| 273 | 322.05 | 3004      | 0.21      | 342 | 391.75 | 4915      | 0.34      | 411 | 461.25 | 6400      | 0.44      |
| 274 | 323.20 | 2350      | 0.16      | 343 | 392.75 | 3792      | 0.26      | 412 | 462.20 | 14204     | 0.97      |
| 275 | 324.15 | 2187      | 0.15      | 344 | 393.75 | 6278      | 0.43      | 413 | 463.25 | 5914      | 0.40      |
| 276 | 325.15 | 1645      | 0.11      | 345 | 394.70 | 4116      | 0.28      | 414 | 464.20 | 24223     | 1.65      |
| 277 | 326.25 | 2909      | 0.20      | 346 | 395.75 | 6297      | 0.43      | 415 | 465.15 | 7959      | 0.54      |
| 278 | 327.25 | 12951     | 0.88      | 347 | 396.75 | 3150      | 0.22      | 416 | 466.20 | 6337      | 0.43      |
| 279 | 328.25 | 185457    | 12.66     | 348 | 397.75 | 6331      | 0.43      | 417 | 467.15 | 2907      | 0.20      |
| 280 | 329.15 | 43614     | 2.98      | 349 | 399.25 | 4067      | 0.28      | 418 | 468.05 | 1516      | 0.10      |
| 281 | 330.15 | 8245      | 0.56      | 350 | 400.15 | 3944      | 0.27      | 419 | 469.05 | 1649      | 0.11      |
| 282 | 331.05 | 2873      | 0.20      | 351 | 401.20 | 6143      | 0.42      | 420 | 470.05 | 1528      | 0.10      |
| 283 | 332.05 | 4167      | 0.28      | 352 | 402.15 | 4691      | 0.32      | 421 | 471.15 | 1527      | 0.10      |
| 284 | 333.05 | 3022      | 0.21      | 353 | 403.20 | 10460     | 0.71      | 422 | 472.05 | 2043      | 0.14      |
| 285 | 334.00 | 7474      | 0.51      | 354 | 404.15 | 11730     | 0.80      | 423 | 473.05 | 1822      | 0.12      |

| #   | m/z    | Abs. Int. | Rel. Int. | #   | m/z    | Abs. Int. | Rel. Int. | #   | m/z    | Abs. Int. | Rel. Int. |
|-----|--------|-----------|-----------|-----|--------|-----------|-----------|-----|--------|-----------|-----------|
| 424 | 474.05 | 2280      | 0.16      | 473 | 523.15 | 8091      | 0.55      | 522 | 574.05 | 505       | 0.03      |
| 425 | 475.15 | 2371      | 0.16      | 474 | 524.15 | 21834     | 1.49      | 523 | 575.00 | 247       | 0.02      |
| 426 | 476.05 | 2926      | 0.20      | 475 | 525.15 | 22476     | 1.53      | 524 | 576.05 | 680       | 0.05      |
| 427 | 477.15 | 3029      | 0.21      | 476 | 526.15 | 55056     | 3.76      | 525 | 576.95 | 551       | 0.04      |
| 428 | 478.05 | 4215      | 0.29      | 477 | 527.15 | 43844     | 2.99      | 526 | 578.00 | 972       | 0.07      |
| 429 | 479.15 | 3675      | 0.25      | 478 | 528.10 | 92798     | 6.33      | 527 | 579.00 | 415       | 0.03      |
| 430 | 480.05 | 5111      | 0.35      | 479 | 529.15 | 35399     | 2.42      | 528 | 579.85 | 565       | 0.04      |
| 431 | 481.15 | 6041      | 0.41      | 480 | 530.10 | 99618     | 6.80      | 529 | 580.90 | 292       | 0.02      |
| 432 | 482.10 | 9151      | 0.62      | 481 | 531.10 | 27508     | 1.88      | 530 | 581.90 | 295       | 0.02      |
| 433 | 483.10 | 9470      | 0.65      | 482 | 532.10 | 32623     | 2.23      | 531 | 583.90 | 313       | 0.02      |
| 434 | 484.10 | 16985     | 1.16      | 483 | 533.10 | 9073      | 0.62      | 532 | 585.00 | 257       | 0.02      |
| 435 | 485.10 | 11826     | 0.81      | 484 | 534.10 | 4012      | 0.27      | 533 | 586.05 | 744       | 0.05      |
| 436 | 486.10 | 22422     | 1.53      | 485 | 535.15 | 1423      | 0.10      | 534 | 587.05 | 809       | 0.06      |
| 437 | 487.15 | 8484      | 0.58      | 486 | 536.15 | 1038      | 0.07      | 535 | 588.00 | 2423      | 0.17      |
| 438 | 488.10 | 23593     | 1.61      | 487 | 537.20 | 1092      | 0.07      | 536 | 589.05 | 2699      | 0.18      |
| 439 | 489.10 | 5918      | 0.40      | 488 | 538.20 | 2463      | 0.17      | 537 | 590.05 | 5818      | 0.40      |
| 440 | 490.10 | 7351      | 0.50      | 489 | 539.25 | 2519      | 0.17      | 538 | 591.05 | 4705      | 0.32      |
| 441 | 491.15 | 2224      | 0.15      | 490 | 540.15 | 5813      | 0.40      | 539 | 592.05 | 9235      | 0.63      |
| 442 | 492.05 | 1433      | 0.10      | 491 | 541.20 | 4666      | 0.32      | 540 | 593.05 | 6356      | 0.43      |
| 443 | 493.15 | 895       | 0.06      | 492 | 542.15 | 8850      | 0.60      | 541 | 594.00 | 11919     | 0.81      |
| 444 | 494.15 | 1397      | 0.10      | 493 | 543.15 | 3404      | 0.23      | 542 | 595.05 | 4809      | 0.33      |
| 445 | 495.15 | 1521      | 0.10      | 494 | 544.15 | 10121     | 0.69      | 543 | 596.05 | 9954      | 0.68      |
| 446 | 496.15 | 2606      | 0.18      | 495 | 545.15 | 2675      | 0.18      | 544 | 597.05 | 2893      | 0.20      |
| 447 | 497.15 | 2497      | 0.17      | 496 | 546.15 | 3410      | 0.23      | 545 | 598.05 | 4235      | 0.29      |
| 448 | 498.20 | 4898      | 0.33      | 497 | 547.20 | 1230      | 0.08      | 546 | 599.10 | 1218      | 0.08      |
| 449 | 499.15 | 3785      | 0.26      | 498 | 548.15 | 591       | 0.04      | 547 | 600.10 | 1034      | 0.07      |
| 450 | 500.15 | 6737      | 0.46      | 499 | 549.50 | 644       | 0.04      | 548 | 601.05 | 567       | 0.04      |
| 451 | 501.15 | 3026      | 0.21      | 500 | 550.75 | 485       | 0.03      | 549 | 602.05 | 897       | 0.06      |
| 452 | 502.10 | 6652      | 0.45      | 501 | 551.80 | 895       | 0.06      | 550 | 603.05 | 765       | 0.05      |
| 453 | 503.15 | 2490      | 0.17      | 502 | 552.75 | 535       | 0.04      | 551 | 604.05 | 1812      | 0.12      |
| 454 | 504.10 | 2625      | 0.18      | 503 | 554.10 | 634       | 0.04      | 552 | 605.15 | 1443      | 0.10      |
| 455 | 505.15 | 1233      | 0.08      | 504 | 555.20 | 423       | 0.03      | 553 | 606.10 | 2610      | 0.18      |
| 456 | 506.15 | 2859      | 0.20      | 505 | 556.20 | 698       | 0.05      | 554 | 607.05 | 2092      | 0.14      |
| 457 | 507.15 | 4058      | 0.28      | 506 | 557.10 | 402       | 0.03      | 555 | 608.05 | 3528      | 0.24      |
| 458 | 508.15 | 18323     | 1.25      | 507 | 558.10 | 958       | 0.07      | 556 | 609.05 | 1284      | 0.09      |
| 459 | 509.15 | 28542     | 1.95      | 508 | 559.15 | 515       | 0.04      | 557 | 610.05 | 2987      | 0.20      |
| 460 | 510.10 | 80658     | 5.51      | 509 | 560.10 | 1039      | 0.07      | 558 | 611.05 | 928       | 0.06      |
| 461 | 511.15 | 79167     | 5.40      | 510 | 561.05 | 753       | 0.05      | 559 | 612.00 | 1057      | 0.07      |
| 462 | 512.10 | 210383    | 14.36     | 511 | 562.10 | 1583      | 0.11      | 560 | 613.00 | 426       | 0.03      |
| 463 | 513.15 | 165589    | 11.30     | 512 | 563.10 | 938       | 0.06      | 561 | 614.00 | 295       | 0.02      |
| 464 | 514.10 | 346700    | 23.67     | 513 | 564.05 | 1915      | 0.13      | 562 | 615.00 | 231       | 0.02      |
| 465 | 515.15 | 130687    | 8.92      | 514 | 564.95 | 663       | 0.05      | 563 | 616.00 | 218       | 0.01      |
| 466 | 516.10 | 377607    | 25.78     | 515 | 566.00 | 1260      | 0.09      | 564 | 618.00 | 262       | 0.02      |
| 467 | 517.10 | 103930    | 7.09      | 516 | 566.95 | 441       | 0.03      | 565 | 619.00 | 242       | 0.02      |
| 468 | 518.10 | 122695    | 8.38      | 517 | 568.00 | 676       | 0.05      | 566 | 620.00 | 412       | 0.03      |
| 469 | 519.05 | 31496     | 2.15      | 518 | 569.00 | 327       | 0.02      | 567 | 621.00 | 337       | 0.02      |
| 470 | 520.10 | 15218     | 1.04      | 519 | 570.00 | 327       | 0.02      | 568 | 622.00 | 554       | 0.04      |
| 471 | 521.10 | 4263      | 0.29      | 520 | 572.00 | 258       | 0.02      | 569 | 623.00 | 289       | 0.02      |
| 472 | 522.15 | 5536      | 0.38      | 521 | 573.00 | 207       | 0.01      | 570 | 624.00 | 510       | 0.03      |

*Dimethyl 5,5'-diselanediyldis(2-acetamidobenzoate) (8).*

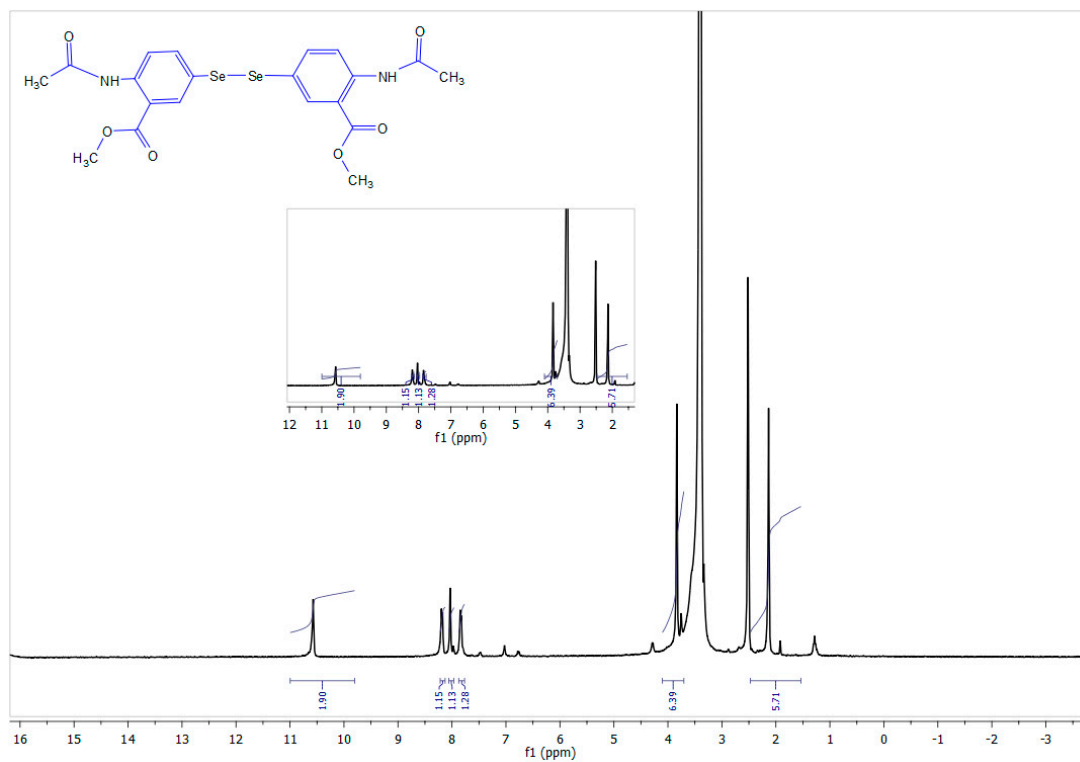

**Figure S17.** <sup>1</sup>H NMR chart of compound 8

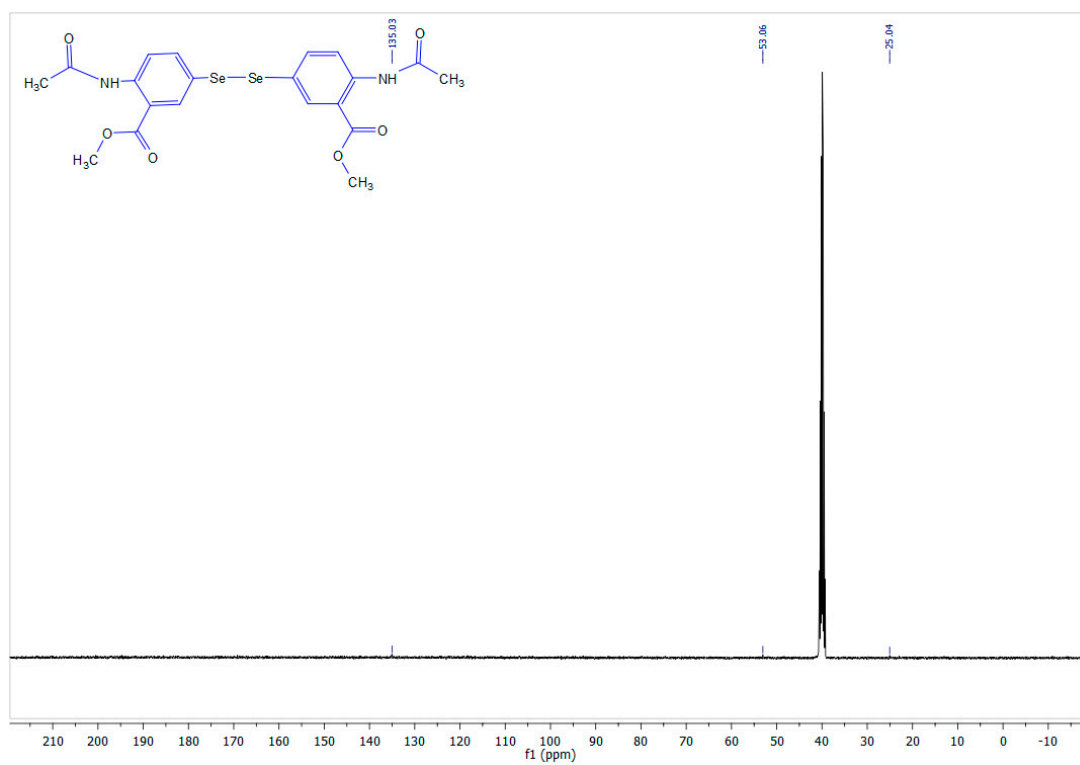

**Figure S18.** <sup>13</sup>C NMR chart of compound 8

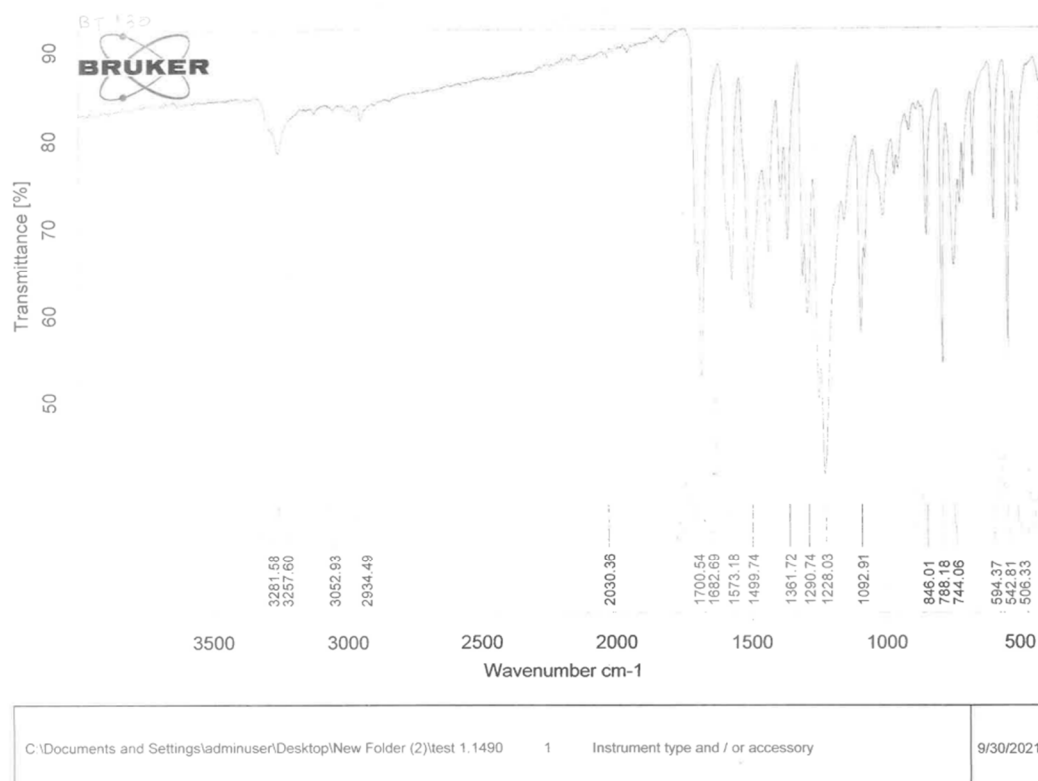

Page 1/1

**Figure S19.** IR chart of compound **8**



# Cairo University Micro Analytical Center

DI Analysis  
Shimadzu Qp-2010 Plus

Sample Information  
Analyzed by : Dr. Mai Younis  
Analyzed : 26/01/2007 03:04:59  
Sample Name : B20  
Sample ID :  
Customer Name : Dr. Mohamed Soliman - Science - Cairo  
Data File : C:\GCMSolution\Data\Project1\B20.QGD  
Org Data File : C:\GCMSolution\Data\Project1\B20.QGD  
Method File : C:\GCMSolution\Data\Project1\High Temperature Op  
Org Method File : C:\GCMSolution\Data\Project1\High Temperature Op  
Report File :  
Tuning File : C:\GCMSolution\System\Tune1\\_default.qgt  
SEndIfModified by : Dr. Mai Younis  
Modified : 26/01/2007 03:14:59

## Method

Analytical Line 1  
IonSourceTemp : 250.00 °C  
[MS Table]  
-Group 1 - Event 1-  
Start Time : 0.00min  
End Time : 10.00min  
ACQ Mode : Scan  
Event Time : 0.50sec  
Scan Speed : 2000  
Start m/z : 50.00  
End m/z : 1000.00  
Electron Voltage : 70 eV  
Ionization Mode : EI

C:\GCMSolution\Data\Project1\B20.QGD

Chromatogram B20 C:\GCMSolution\Data\Project1\B20.QGD

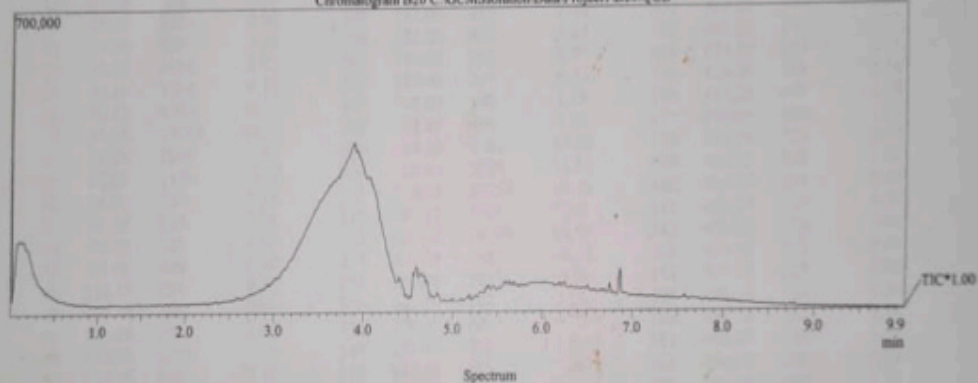

Line#:1 R.Time:3.9(Scan#:466)  
MassPeaks:225(Peak Elimination m/z: 570.20)  
RawMode:Single 3.9(466) BasePeak:230(33772)  
BG Mode:None Group 1 - Event 1

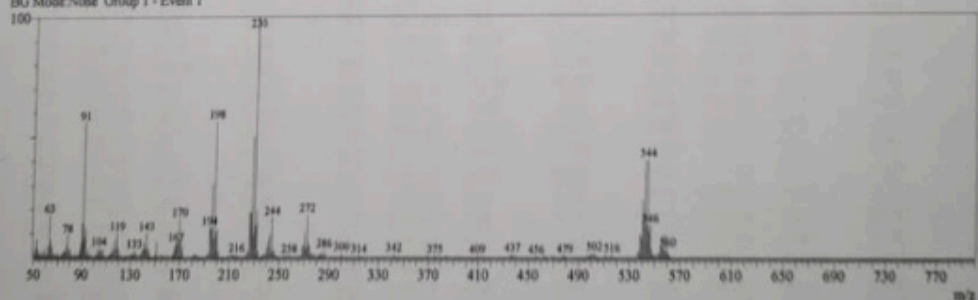

## Mass Table

Line#:1 R.Time:3.9(Scan#:466)  
MassPeaks:225(Peak Elimination m/z: 570.20)  
RawMode:Single 3.9(466) BasePeak:230(33772)  
BG Mode:None Group 1 - Event 1

| # | m/z   | Abs. In | Rel. Int. | # | m/z   | Abs. In | Rel. Int. | # | m/z   | Abs. In | Rel. Int. |
|---|-------|---------|-----------|---|-------|---------|-----------|---|-------|---------|-----------|
| 1 | 50.00 | 503     | 1.49      | 4 | 53.05 | 1107    | 3.28      | 7 | 56.10 | 265     | 0.78      |
| 2 | 51.10 | 1241    | 3.67      | 5 | 54.10 | 612     | 1.81      | 8 | 57.10 | 674     | 2.00      |
| 3 | 52.10 | 2558    | 7.57      | 6 | 55.10 | 522     | 1.55      | 9 | 58.10 | 350     | 1.04      |

Figure S20. Mass chart of compound 8

| #  | m/z    | Abs. In | Rel. Int. | #   | m/z    | Abs. In | Rel. Int. | #   | m/z    | Abs. In | Rel. Int. |
|----|--------|---------|-----------|-----|--------|---------|-----------|-----|--------|---------|-----------|
| 10 | 59.10  | 1150    | 3.41      | 79  | 141.10 | 2124    | 6.29      | 148 | 258.10 | 273     | 0.81      |
| 11 | 60.10  | 262     | 0.78      | 80  | 142.10 | 1193    | 3.53      | 149 | 266.10 | 234     | 0.69      |
| 12 | 61.10  | 506     | 1.50      | 81  | 143.10 | 3423    | 10.14     | 150 | 268.20 | 1455    | 4.31      |
| 13 | 62.15  | 1522    | 4.51      | 82  | 144.15 | 1202    | 3.56      | 151 | 269.20 | 1751    | 5.18      |
| 14 | 63.10  | 5911    | 17.50     | 83  | 145.05 | 866     | 2.56      | 152 | 270.20 | 3359    | 9.95      |
| 15 | 64.10  | 2404    | 7.12      | 84  | 146.10 | 302     | 0.89      | 153 | 271.25 | 1293    | 3.83      |
| 16 | 65.10  | 1428    | 4.23      | 85  | 150.25 | 468     | 1.39      | 154 | 272.15 | 5965    | 17.66     |
| 17 | 66.10  | 606     | 1.79      | 86  | 151.20 | 2284    | 6.76      | 155 | 273.10 | 1935    | 5.73      |
| 18 | 67.10  | 402     | 1.19      | 87  | 153.20 | 401     | 1.19      | 156 | 274.15 | 1566    | 4.64      |
| 19 | 68.10  | 263     | 0.78      | 88  | 155.20 | 258     | 0.76      | 157 | 275.10 | 511     | 1.51      |
| 20 | 69.10  | 545     | 1.61      | 89  | 156.20 | 297     | 0.88      | 158 | 276.10 | 406     | 1.20      |
| 21 | 70.10  | 249     | 0.74      | 90  | 158.20 | 242     | 0.72      | 159 | 278.10 | 484     | 1.43      |
| 22 | 71.10  | 266     | 0.79      | 91  | 159.20 | 210     | 0.62      | 160 | 280.10 | 234     | 0.69      |
| 23 | 73.10  | 303     | 0.90      | 92  | 161.20 | 202     | 0.60      | 161 | 282.10 | 306     | 0.91      |
| 24 | 74.10  | 714     | 2.11      | 93  | 164.20 | 212     | 0.63      | 162 | 283.10 | 310     | 0.92      |
| 25 | 75.10  | 783     | 2.32      | 94  | 165.15 | 640     | 1.90      | 163 | 284.10 | 610     | 1.81      |
| 26 | 76.15  | 822     | 2.43      | 95  | 166.10 | 1361    | 4.03      | 164 | 285.10 | 385     | 1.14      |
| 27 | 77.15  | 1711    | 5.07      | 96  | 167.10 | 1886    | 5.58      | 165 | 286.15 | 1014    | 3.00      |
| 28 | 78.10  | 3119    | 9.24      | 97  | 168.10 | 3095    | 9.16      | 166 | 287.20 | 265     | 0.78      |
| 29 | 79.20  | 1262    | 3.74      | 98  | 169.10 | 2214    | 6.56      | 167 | 300.20 | 559     | 1.66      |
| 30 | 80.15  | 1005    | 2.98      | 99  | 170.05 | 5367    | 15.89     | 168 | 314.20 | 247     | 0.73      |
| 31 | 81.20  | 351     | 1.04      | 100 | 171.10 | 2543    | 7.53      | 169 | 342.20 | 441     | 1.31      |
| 32 | 83.20  | 350     | 1.04      | 101 | 172.00 | 1362    | 4.03      | 170 | 369.20 | 207     | 0.61      |
| 33 | 84.20  | 223     | 0.66      | 102 | 173.00 | 492     | 1.46      | 171 | 375.20 | 222     | 0.66      |
| 34 | 85.20  | 335     | 0.99      | 103 | 181.00 | 257     | 0.76      | 172 | 384.20 | 226     | 0.67      |
| 35 | 87.20  | 420     | 1.24      | 104 | 182.00 | 420     | 1.24      | 173 | 409.20 | 246     | 0.73      |
| 36 | 88.15  | 1036    | 3.07      | 105 | 183.00 | 252     | 0.75      | 174 | 435.20 | 254     | 0.75      |
| 37 | 89.10  | 2164    | 6.41      | 106 | 185.00 | 247     | 0.73      | 175 | 436.20 | 255     | 0.76      |
| 38 | 90.15  | 4905    | 14.52     | 107 | 192.00 | 398     | 1.18      | 176 | 437.20 | 449     | 1.33      |
| 39 | 91.15  | 18935   | 56.07     | 108 | 193.10 | 466     | 1.38      | 177 | 439.20 | 449     | 1.33      |
| 40 | 92.05  | 2859    | 8.47      | 109 | 194.10 | 4161    | 12.32     | 178 | 456.20 | 226     | 0.67      |
| 41 | 93.05  | 4108    | 12.16     | 110 | 195.10 | 3886    | 11.51     | 179 | 462.20 | 302     | 0.89      |
| 42 | 94.00  | 383     | 1.13      | 111 | 196.05 | 10254   | 30.36     | 180 | 464.20 | 231     | 0.68      |
| 43 | 95.10  | 938     | 2.78      | 112 | 197.15 | 2506    | 7.42      | 181 | 468.20 | 260     | 0.77      |
| 44 | 96.10  | 225     | 0.67      | 113 | 198.05 | 19109   | 56.58     | 182 | 470.20 | 274     | 0.81      |
| 45 | 97.10  | 406     | 1.20      | 114 | 199.05 | 3453    | 10.22     | 183 | 477.20 | 215     | 0.64      |
| 46 | 101.10 | 238     | 0.70      | 115 | 200.05 | 3845    | 11.39     | 184 | 478.20 | 222     | 0.66      |
| 47 | 102.10 | 306     | 0.91      | 116 | 201.10 | 748     | 2.21      | 185 | 479.20 | 316     | 0.94      |
| 48 | 103.15 | 954     | 2.82      | 117 | 209.10 | 260     | 0.77      | 186 | 496.20 | 292     | 0.86      |
| 49 | 104.20 | 1278    | 3.78      | 118 | 211.10 | 350     | 1.04      | 187 | 498.20 | 420     | 1.24      |
| 50 | 105.15 | 849     | 2.51      | 119 | 212.10 | 367     | 1.09      | 188 | 499.20 | 318     | 0.94      |
| 51 | 106.10 | 1078    | 3.19      | 120 | 213.10 | 263     | 0.78      | 189 | 500.30 | 630     | 1.87      |
| 52 | 107.20 | 913     | 2.70      | 121 | 214.10 | 266     | 0.79      | 190 | 501.30 | 233     | 0.69      |
| 53 | 108.20 | 226     | 0.67      | 122 | 216.10 | 414     | 1.23      | 191 | 502.30 | 638     | 1.89      |
| 54 | 109.20 | 236     | 0.70      | 123 | 223.10 | 278     | 0.82      | 192 | 504.30 | 351     | 1.04      |
| 55 | 112.20 | 214     | 0.63      | 124 | 224.15 | 929     | 2.75      | 193 | 510.30 | 252     | 0.75      |
| 56 | 113.20 | 431     | 1.28      | 125 | 225.15 | 732     | 2.17      | 194 | 511.30 | 228     | 0.68      |
| 57 | 114.05 | 520     | 1.54      | 126 | 226.10 | 6334    | 18.76     | 195 | 512.30 | 263     | 0.78      |
| 58 | 115.05 | 1330    | 3.94      | 127 | 227.10 | 6332    | 18.75     | 196 | 515.30 | 215     | 0.64      |
| 59 | 116.10 | 806     | 2.39      | 128 | 228.10 | 16798   | 49.74     | 197 | 516.30 | 447     | 1.32      |
| 60 | 117.10 | 2417    | 7.16      | 129 | 229.15 | 3157    | 9.35      | 198 | 528.30 | 212     | 0.63      |
| 61 | 118.15 | 1273    | 3.77      | 130 | 230.10 | 33772   | 100.00    | 199 | 536.25 | 679     | 2.01      |
| 62 | 119.15 | 3449    | 10.21     | 131 | 231.05 | 4489    | 13.29     | 200 | 537.20 | 929     | 2.75      |
| 63 | 120.20 | 974     | 2.88      | 132 | 232.10 | 6570    | 19.45     | 201 | 538.25 | 3310    | 9.80      |
| 64 | 121.20 | 334     | 0.99      | 133 | 233.05 | 864     | 2.56      | 202 | 539.35 | 2783    | 8.24      |
| 65 | 123.20 | 225     | 0.67      | 134 | 236.10 | 206     | 0.61      | 203 | 540.30 | 7903    | 23.40     |
| 66 | 126.20 | 242     | 0.72      | 135 | 237.10 | 294     | 0.87      | 204 | 541.25 | 6033    | 17.86     |
| 67 | 127.20 | 244     | 0.72      | 136 | 238.10 | 487     | 1.44      | 205 | 542.30 | 13409   | 39.70     |
| 68 | 129.20 | 390     | 1.15      | 137 | 239.15 | 676     | 2.00      | 206 | 543.35 | 4404    | 13.04     |
| 69 | 130.20 | 354     | 1.05      | 138 | 240.15 | 1315    | 3.89      | 207 | 544.30 | 13558   | 40.15     |
| 70 | 131.20 | 332     | 0.98      | 139 | 241.15 | 2341    | 6.93      | 208 | 545.30 | 3666    | 10.86     |
| 71 | 132.20 | 703     | 2.08      | 140 | 242.15 | 3157    | 9.35      | 209 | 546.30 | 4534    | 13.43     |
| 72 | 133.20 | 946     | 2.80      | 141 | 243.25 | 991     | 2.93      | 210 | 547.25 | 1122    | 3.32      |
| 73 | 134.20 | 370     | 1.10      | 142 | 244.15 | 5586    | 16.54     | 211 | 548.15 | 686     | 2.03      |
| 74 | 135.20 | 602     | 1.78      | 143 | 245.15 | 702     | 2.08      | 212 | 549.10 | 242     | 0.72      |
| 75 | 137.20 | 324     | 0.96      | 144 | 246.15 | 1116    | 3.30      | 213 | 550.10 | 311     | 0.92      |
| 76 | 138.20 | 313     | 0.93      | 145 | 248.10 | 225     | 0.67      | 214 | 551.10 | 215     | 0.64      |
| 77 | 139.15 | 868     | 2.57      | 146 | 254.10 | 257     | 0.76      | 215 | 552.30 | 695     | 2.06      |
| 78 | 140.10 | 1078    | 3.19      | 147 | 256.10 | 231     | 0.68      | 216 | 553.30 | 588     | 1.74      |

*dimethyl 5,5'-diselanediyldis(2-(2-chloroacetamido) benzoate) (9).*

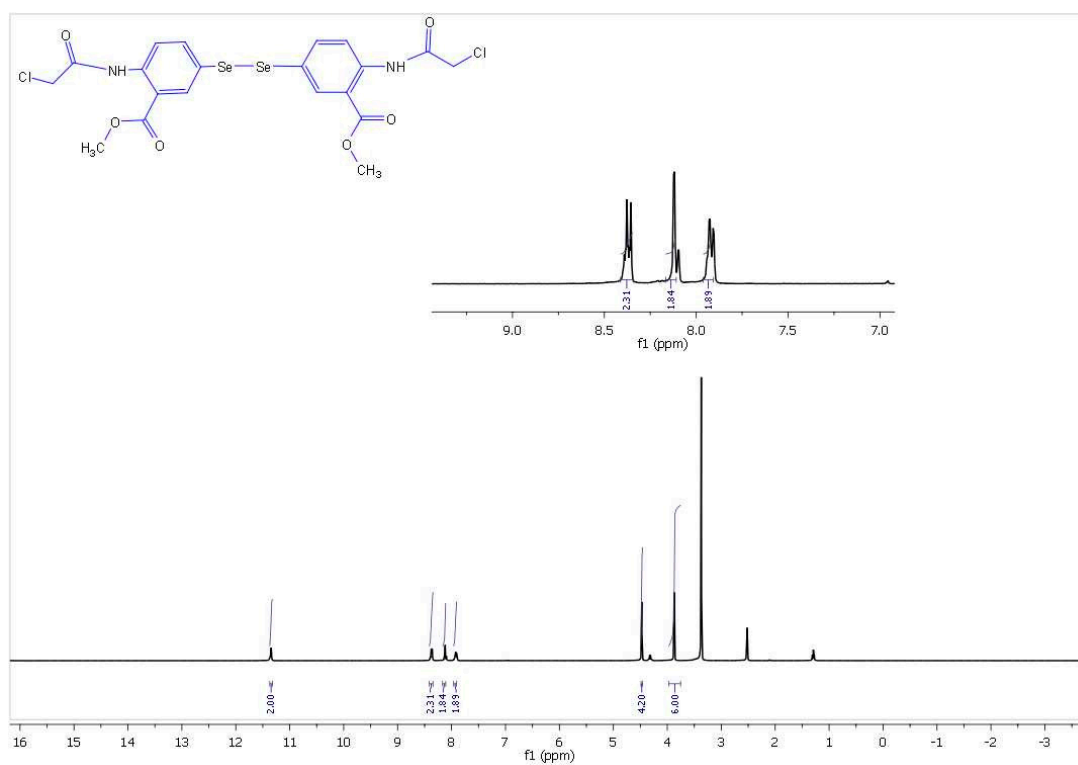

**Figure S21.** <sup>1</sup>H NMR chart of compound 9

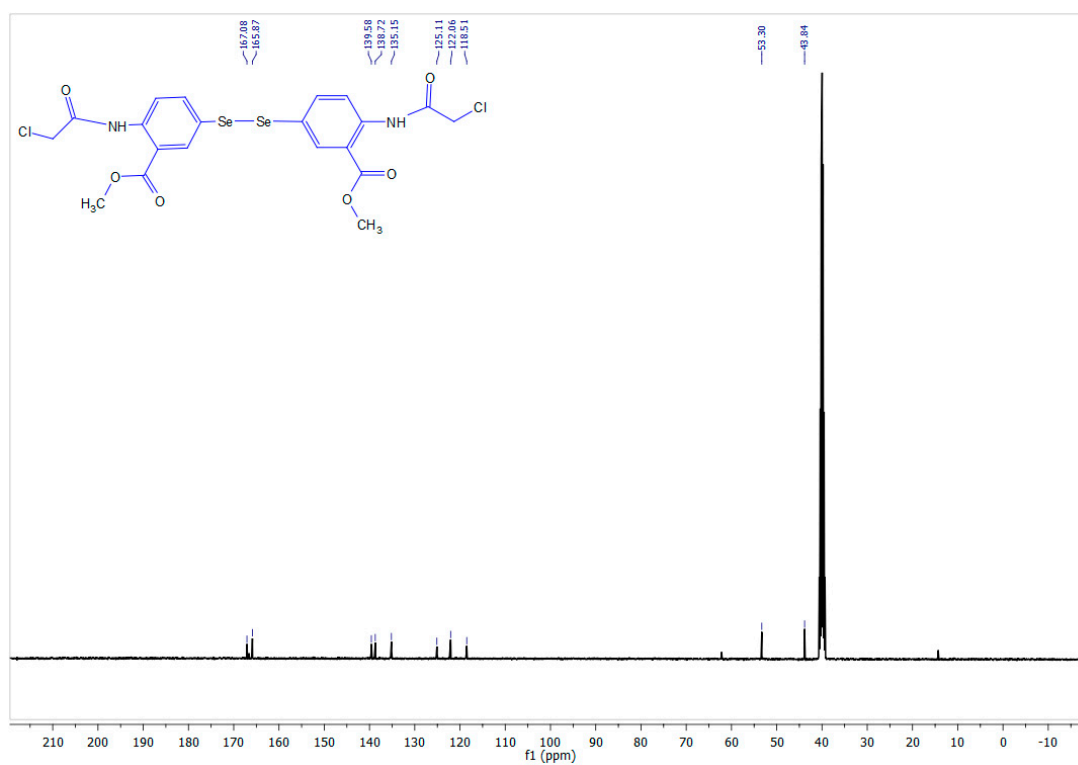

**Figure S22.** <sup>13</sup>C NMR chart of compound 9

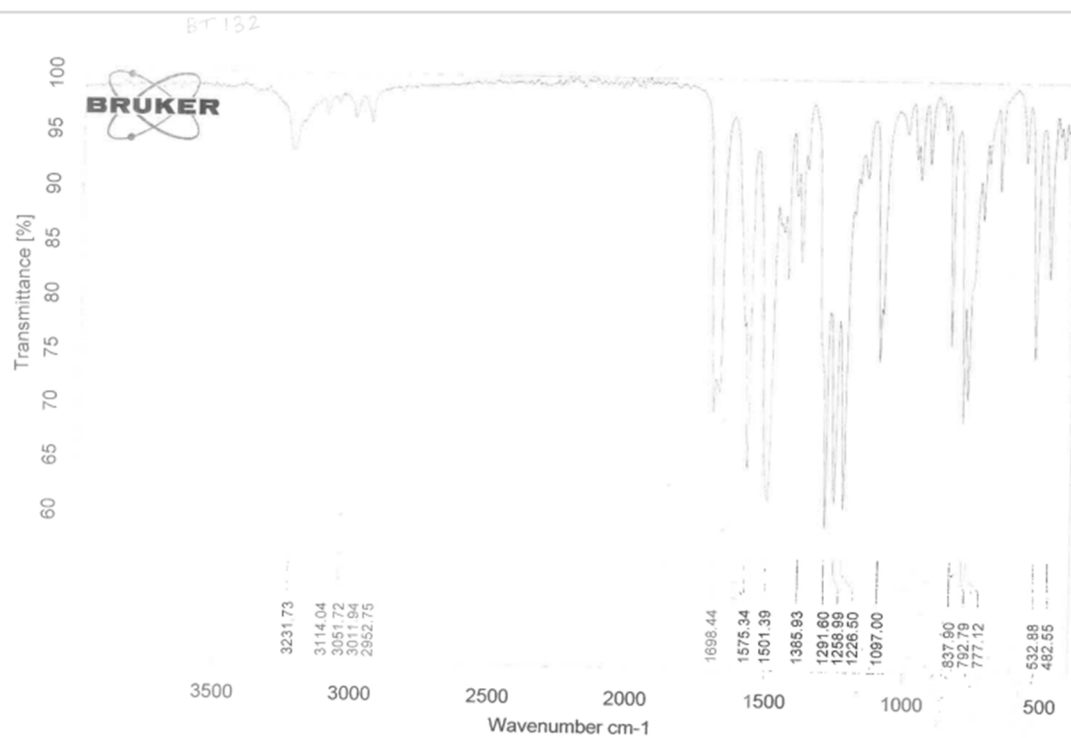

**Figure S23.** IR chart of compound **9**



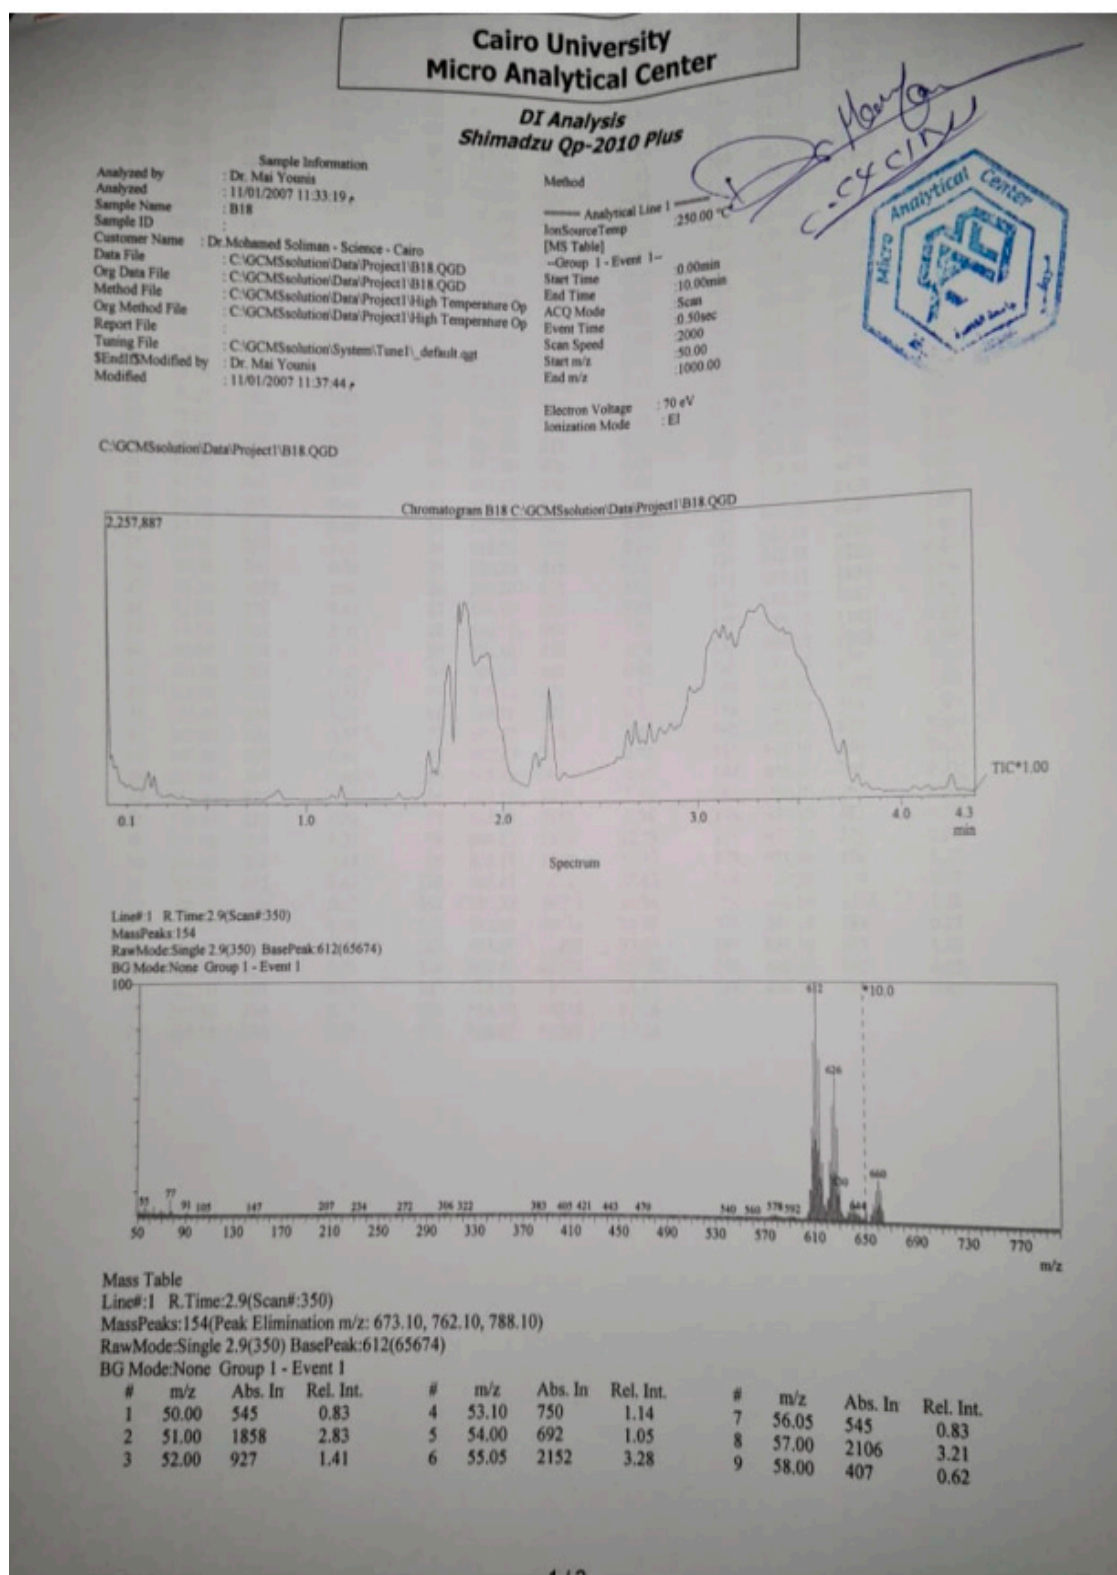

**Figure S24. Mass chart of compound 9**

| #  | m/z    | Abs. In | Rel. Int. | #   | m/z    | Abs. In | Rel. Int. | #   | m/z    | Abs. In | Rel. Int. |
|----|--------|---------|-----------|-----|--------|---------|-----------|-----|--------|---------|-----------|
| 10 | 59.05  | 954     | 1.45      | 59  | 407.00 | 273     | 0.42      | 108 | 616.10 | 15687   | 23.89     |
| 11 | 60.05  | 1042    | 1.59      | 60  | 421.00 | 374     | 0.57      | 109 | 617.10 | 3929    | 5.98      |
| 12 | 61.10  | 380     | 0.58      | 61  | 435.00 | 201     | 0.31      | 110 | 618.15 | 4328    | 6.59      |
| 13 | 61.95  | 614     | 0.93      | 62  | 443.00 | 215     | 0.33      | 111 | 619.15 | 2547    | 3.88      |
| 14 | 63.05  | 2356    | 3.59      | 63  | 470.00 | 292     | 0.44      | 112 | 620.15 | 5955    | 9.07      |
| 15 | 64.10  | 710     | 1.08      | 64  | 472.00 | 268     | 0.41      | 113 | 621.15 | 5755    | 8.76      |
| 16 | 65.10  | 558     | 0.85      | 65  | 540.00 | 218     | 0.33      | 114 | 622.15 | 16067   | 24.46     |
| 17 | 66.10  | 282     | 0.43      | 66  | 544.00 | 215     | 0.33      | 115 | 623.15 | 12409   | 18.89     |
| 18 | 67.15  | 803     | 1.22      | 67  | 548.00 | 354     | 0.54      | 116 | 624.15 | 31335   | 47.71     |
| 19 | 68.10  | 415     | 0.63      | 68  | 550.00 | 210     | 0.32      | 117 | 625.15 | 13327   | 20.29     |
| 20 | 69.10  | 1537    | 2.34      | 69  | 552.00 | 255     | 0.39      | 118 | 626.15 | 39401   | 59.99     |
| 21 | 70.10  | 551     | 0.84      | 70  | 560.00 | 246     | 0.37      | 119 | 627.15 | 12515   | 19.06     |
| 22 | 71.10  | 1018    | 1.55      | 71  | 562.00 | 231     | 0.35      | 120 | 628.15 | 25447   | 38.75     |
| 23 | 73.05  | 824     | 1.25      | 72  | 574.00 | 569     | 0.87      | 121 | 629.10 | 6876    | 10.47     |
| 24 | 74.00  | 465     | 0.71      | 73  | 575.00 | 402     | 0.61      | 122 | 630.15 | 8710    | 13.26     |
| 25 | 75.00  | 278     | 0.42      | 74  | 576.10 | 1110    | 1.69      | 123 | 631.15 | 2531    | 3.85      |
| 26 | 76.05  | 703     | 1.07      | 75  | 577.00 | 353     | 0.54      | 124 | 632.15 | 2020    | 3.08      |
| 27 | 77.05  | 4277    | 6.51      | 76  | 578.00 | 1385    | 2.11      | 125 | 633.20 | 815     | 1.24      |
| 28 | 78.05  | 980     | 1.49      | 77  | 579.20 | 434     | 0.66      | 126 | 634.15 | 1129    | 1.72      |
| 29 | 79.05  | 1359    | 2.07      | 78  | 580.20 | 778     | 1.18      | 127 | 635.15 | 1040    | 1.58      |
| 30 | 80.00  | 284     | 0.43      | 79  | 581.20 | 217     | 0.33      | 128 | 636.20 | 2655    | 4.04      |
| 31 | 81.00  | 262     | 0.40      | 80  | 582.20 | 436     | 0.66      | 129 | 637.20 | 2030    | 3.09      |
| 32 | 83.00  | 462     | 0.70      | 81  | 583.20 | 278     | 0.42      | 130 | 638.15 | 4478    | 6.82      |
| 33 | 84.00  | 286     | 0.44      | 82  | 585.20 | 234     | 0.36      | 131 | 639.15 | 2428    | 3.70      |
| 34 | 85.00  | 274     | 0.42      | 83  | 587.20 | 327     | 0.50      | 132 | 640.20 | 6089    | 9.27      |
| 35 | 89.00  | 209     | 0.32      | 84  | 588.20 | 327     | 0.50      | 133 | 641.15 | 2269    | 3.45      |
| 36 | 90.00  | 250     | 0.38      | 85  | 589.20 | 415     | 0.63      | 134 | 642.15 | 4222    | 6.43      |
| 37 | 91.00  | 1057    | 1.61      | 86  | 590.20 | 673     | 1.02      | 135 | 643.15 | 1834    | 2.79      |
| 38 | 92.00  | 278     | 0.42      | 87  | 591.10 | 295     | 0.45      | 136 | 644.15 | 2467    | 3.76      |
| 39 | 93.00  | 223     | 0.34      | 88  | 592.15 | 860     | 1.31      | 137 | 645.15 | 1182    | 1.80      |
| 40 | 99.00  | 204     | 0.31      | 89  | 593.10 | 378     | 0.58      | 138 | 646.10 | 1898    | 2.89      |
| 41 | 105.00 | 284     | 0.43      | 90  | 594.10 | 602     | 0.92      | 139 | 647.15 | 677     | 1.03      |
| 42 | 115.00 | 210     | 0.32      | 91  | 595.10 | 276     | 0.42      | 140 | 648.10 | 1182    | 1.80      |
| 43 | 125.00 | 204     | 0.31      | 92  | 596.10 | 281     | 0.43      | 141 | 649.10 | 454     | 0.69      |
| 44 | 147.00 | 206     | 0.31      | 93  | 597.10 | 218     | 0.33      | 142 | 650.10 | 526     | 0.80      |
| 45 | 207.00 | 407     | 0.62      | 94  | 602.10 | 346     | 0.53      | 143 | 651.10 | 260     | 0.40      |
| 46 | 209.00 | 300     | 0.46      | 95  | 603.10 | 295     | 0.45      | 144 | 654.10 | 201     | 0.31      |
| 47 | 212.00 | 527     | 0.80      | 96  | 604.10 | 1833    | 2.79      | 145 | 655.10 | 202     | 0.31      |
| 48 | 234.00 | 223     | 0.34      | 97  | 605.15 | 2195    | 3.34      | 146 | 656.10 | 481     | 0.73      |
| 49 | 272.00 | 209     | 0.32      | 98  | 606.15 | 8221    | 12.52     | 147 | 657.10 | 326     | 0.50      |
| 50 | 304.00 | 286     | 0.44      | 99  | 607.15 | 8098    | 12.33     | 148 | 658.20 | 833     | 1.27      |
| 51 | 306.00 | 415     | 0.63      | 100 | 608.10 | 25362   | 38.62     | 149 | 659.20 | 377     | 0.57      |
| 52 | 308.00 | 426     | 0.65      | 101 | 609.15 | 19573   | 29.80     | 150 | 660.20 | 1118    | 1.70      |
| 53 | 320.00 | 313     | 0.48      | 102 | 610.10 | 49014   | 74.63     | 151 | 661.10 | 494     | 0.75      |
| 54 | 322.00 | 276     | 0.42      | 103 | 611.15 | 21892   | 33.33     | 152 | 662.10 | 855     | 1.30      |
| 55 | 326.00 | 204     | 0.31      | 104 | 612.10 | 65674   | 100.00    | 153 | 663.10 | 343     | 0.52      |
| 56 | 383.00 | 305     | 0.46      | 105 | 613.15 | 18961   | 28.87     | 154 | 664.10 | 310     | 0.47      |
| 57 | 391.00 | 206     | 0.31      | 106 | 614.10 | 44318   | 67.48     |     |        |         |           |
| 58 | 405.00 | 230     | 0.35      | 107 | 615.15 | 11267   | 17.16     |     |        |         |           |

Mass chart of compound 9

dimethyl 5,5'-diselanediyldis(2-(2-phenoxyacetamido) benzoate) (**10**).

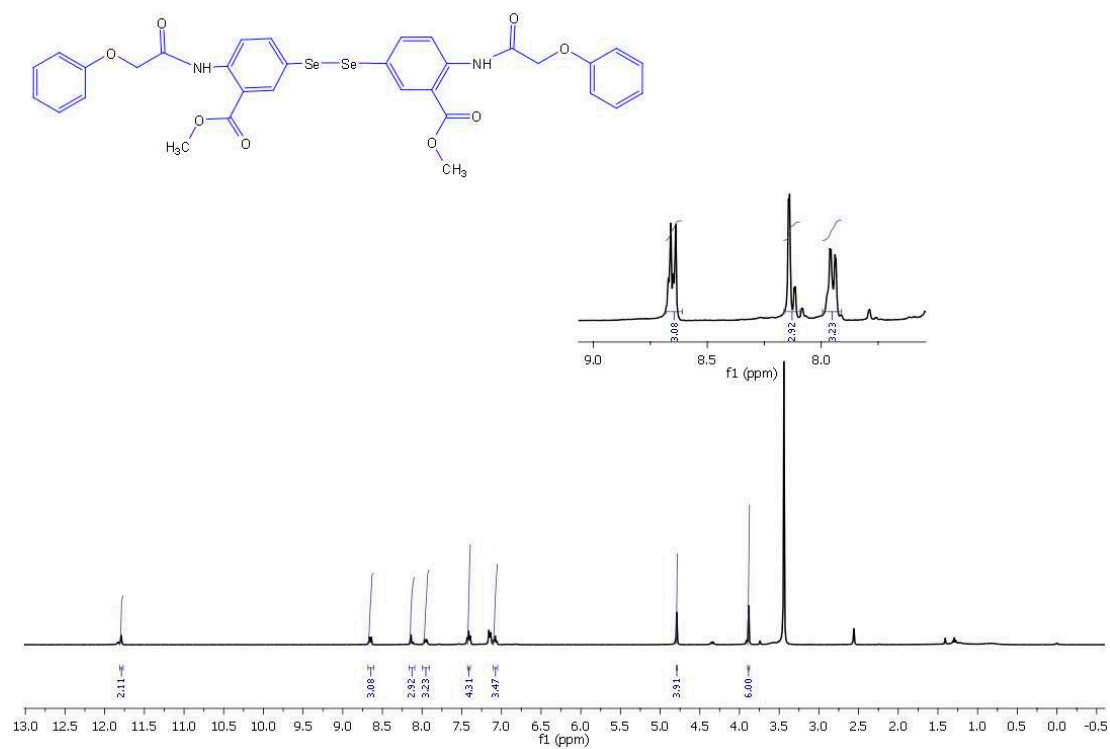

Figure S25. <sup>1</sup>H NMR chart of compound **10**

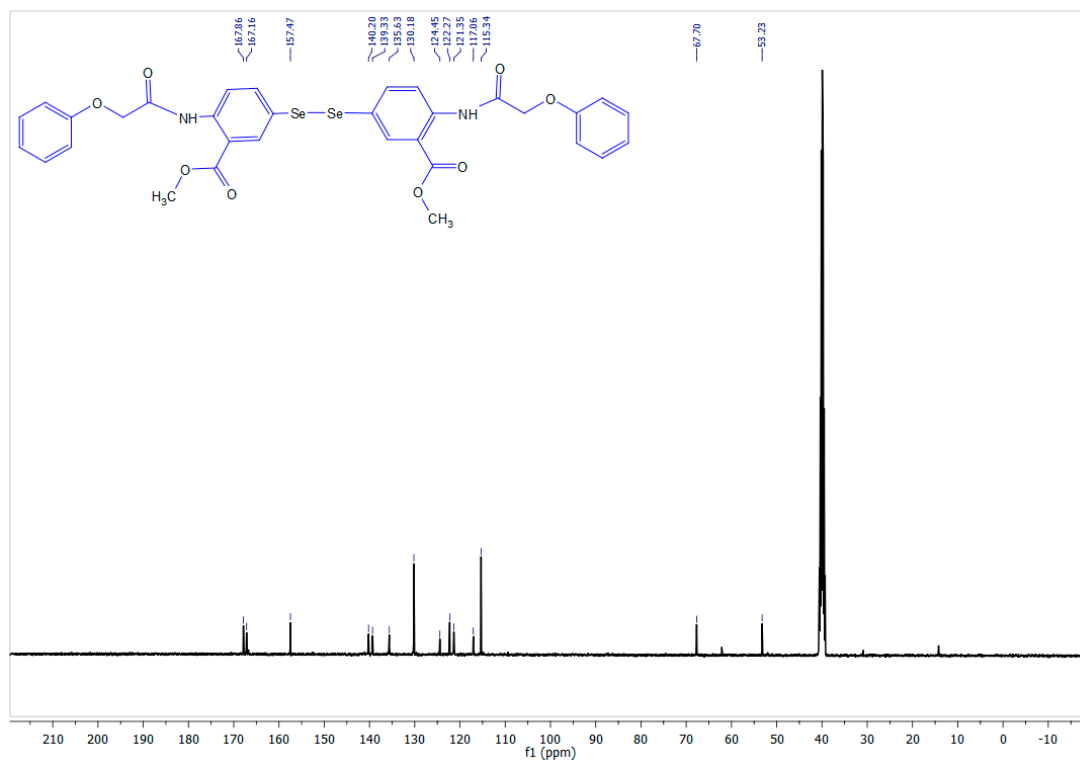

Figure S26. <sup>13</sup>C NMR chart of compound **10**

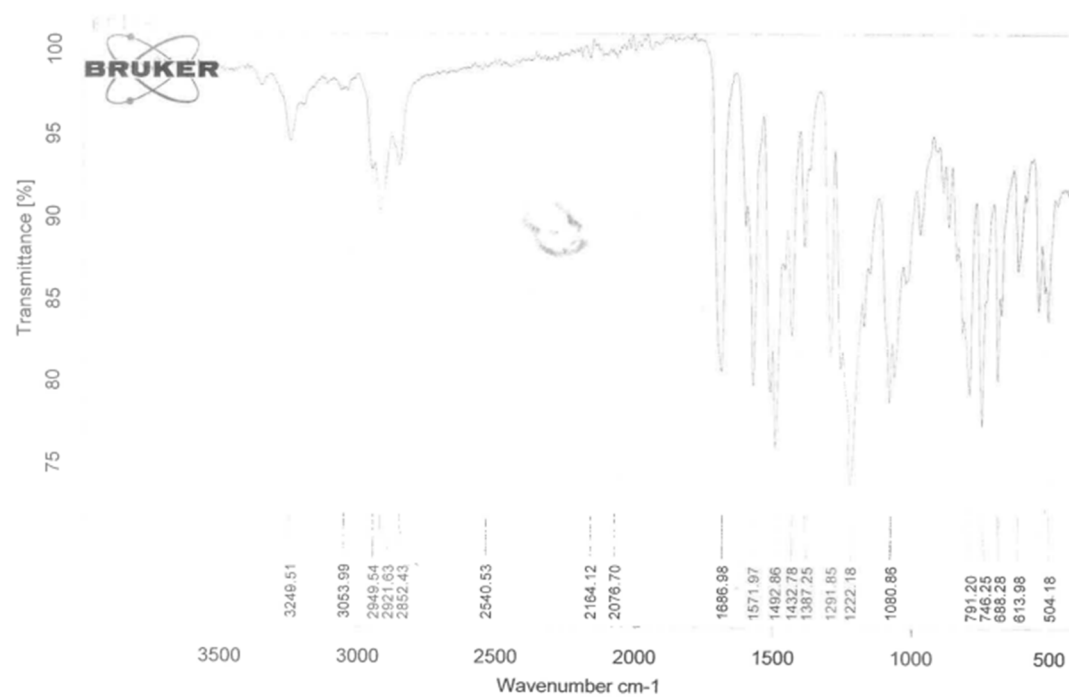

**Figure S27.** IR chart of compound **10**



# Cairo University Micro Analytical Center

DI Analysis  
Shimadzu Qp-2010 Plus

Sample Information  
Analysed by : Dr. Mai Younis  
Analysed : 10/01/2007 01:52:05  
Sample Name : B19  
Sample ID :  
Customer Name : Dr. Mohamed Soliman - Science - Cairo  
Data File : C:\GCMSolution\Data\Project1\B19.QGD  
Org Data File : C:\GCMSolution\Data\Project1\B19.QGD  
Method File : C:\GCMSolution\Data\Project1\High Temperature Op  
Org Method File : C:\GCMSolution\Data\Project1\High Temperature Op  
Report File :  
Tuning File : C:\GCMSolution\System1\Tune1\_default.qgt  
SEndISModified by : Dr. Mai Younis  
Modified : 10/01/2007 01:56:55

## Method

Analytical Line 1  
IonSourceTemp : 250.00 °C  
[MS Table]  
--Group 1 - Event 1--  
Start Time : 0.00min  
End Time : 10.00min  
ACQ Mode : Scan  
Event Time : 0.50sec  
Scan Speed : 2000  
Start m/z : 50.00  
End m/z : 1000.00  
Electron Voltage : 70 eV  
Ionization Mode : EI

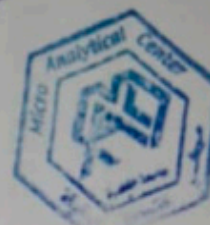

C:\GCMSolution\Data\Project1\B19.QGD

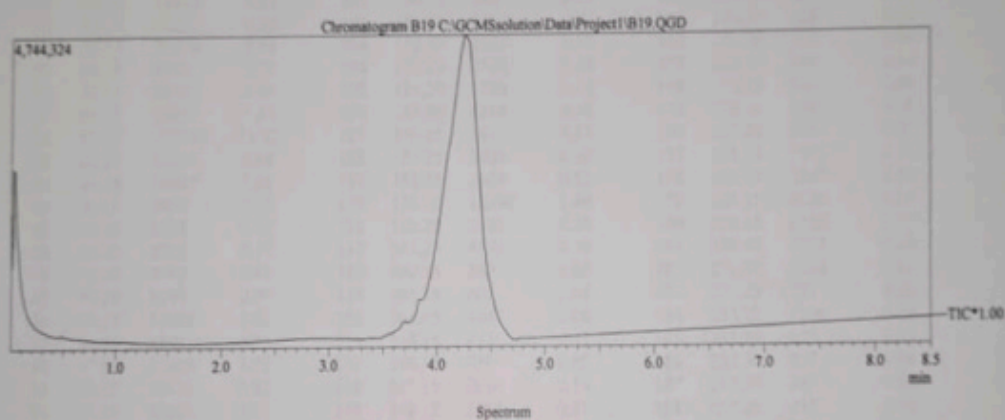

Line#:1 R.Time:4.3(Scan#:519)  
MassPeak:273  
RawMode:Single 4.3(519) BasePeak:59(1235801)  
BG Mode:None Group 1 - Event 1

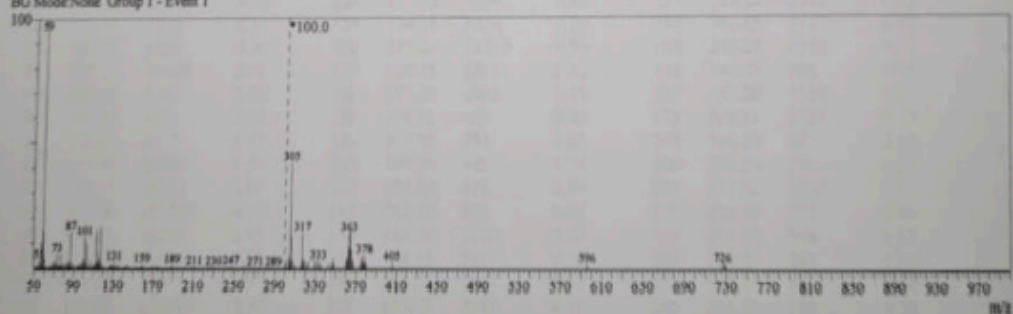

## Mass Table

Line#:1 R.Time:4.3(Scan#:519)

MassPeak:273

RawMode:Single 4.3(519) BasePeak:59(1235801)

BG Mode:None Group 1 - Event 1

| # | m/z   | Abs. In | Rel. Int. | # | m/z   | Abs. In | Rel. Int. | # | m/z   | Abs. In | Rel. Int. |
|---|-------|---------|-----------|---|-------|---------|-----------|---|-------|---------|-----------|
| 1 | 50.15 | 2698    | 0.22      | 4 | 53.10 | 3495    | 0.28      | 7 | 56.15 | 19746   | 1.60      |
| 2 | 51.05 | 9293    | 0.75      | 5 | 54.15 | 5683    | 0.46      | 8 | 57.10 | 123422  | 9.99      |
| 3 | 52.05 | 2888    | 0.23      | 6 | 55.10 | 37022   | 3.00      | 9 | 58.15 | 183707  | 14.87     |

Figure S28. Mass chart of compound 10

| #  | m/z    | Abs. In | Rel. Int. | #   | m/z    | Abs. In | Rel. Int. | #   | m/z    | Abs. In | Rel. Int. |
|----|--------|---------|-----------|-----|--------|---------|-----------|-----|--------|---------|-----------|
| 10 | 59.10  | 123580  | 100.00    | 79  | 128.25 | 9913    | 0.80      | 148 | 197.15 | 1106    | 0.09      |
| 11 | 60.05  | 51056   | 4.13      | 80  | 129.20 | 12753   | 1.03      | 149 | 198.05 | 3266    | 0.26      |
| 12 | 61.10  | 9529    | 0.77      | 81  | 130.25 | 6350    | 0.51      | 150 | 199.20 | 1182    | 0.10      |
| 13 | 62.15  | 1694    | 0.14      | 82  | 131.20 | 27886   | 2.26      | 151 | 200.15 | 1450    | 0.12      |
| 14 | 63.10  | 4455    | 0.36      | 83  | 132.25 | 5385    | 0.44      | 152 | 201.25 | 5737    | 0.46      |
| 15 | 64.15  | 2465    | 0.20      | 84  | 133.20 | 8585    | 0.69      | 153 | 202.20 | 1385    | 0.11      |
| 16 | 65.10  | 7606    | 0.62      | 85  | 134.25 | 2900    | 0.23      | 154 | 203.25 | 2177    | 0.18      |
| 17 | 66.15  | 3107    | 0.25      | 86  | 135.25 | 16736   | 1.35      | 155 | 204.25 | 591     | 0.05      |
| 18 | 67.10  | 8836    | 0.72      | 87  | 136.25 | 1396    | 0.11      | 156 | 205.30 | 774     | 0.06      |
| 19 | 68.15  | 5741    | 0.46      | 88  | 137.20 | 1366    | 0.11      | 157 | 206.10 | 412     | 0.03      |
| 20 | 69.10  | 29596   | 2.39      | 89  | 138.25 | 929     | 0.08      | 158 | 207.05 | 1397    | 0.11      |
| 21 | 70.15  | 13485   | 1.09      | 90  | 139.20 | 3474    | 0.28      | 159 | 208.10 | 1767    | 0.14      |
| 22 | 71.10  | 35452   | 2.87      | 91  | 140.25 | 2026    | 0.16      | 160 | 209.05 | 3204    | 0.26      |
| 23 | 72.15  | 16940   | 1.37      | 92  | 141.20 | 4914    | 0.40      | 161 | 210.15 | 1494    | 0.12      |
| 24 | 73.10  | 68638   | 5.55      | 93  | 142.25 | 4078    | 0.33      | 162 | 211.05 | 5748    | 0.47      |
| 25 | 74.15  | 7886    | 0.64      | 94  | 143.20 | 18249   | 1.48      | 163 | 212.15 | 1930    | 0.16      |
| 26 | 75.15  | 16723   | 1.35      | 95  | 144.20 | 4407    | 0.36      | 164 | 213.15 | 2716    | 0.22      |
| 27 | 76.15  | 7868    | 0.64      | 96  | 145.20 | 7615    | 0.62      | 165 | 214.25 | 634     | 0.05      |
| 28 | 77.10  | 68041   | 5.51      | 97  | 146.25 | 2609    | 0.21      | 166 | 215.30 | 631     | 0.05      |
| 29 | 78.15  | 8611    | 0.70      | 98  | 147.20 | 2892    | 0.23      | 167 | 216.20 | 326     | 0.03      |
| 30 | 79.15  | 20331   | 1.65      | 99  | 148.20 | 695     | 0.06      | 168 | 217.25 | 1847    | 0.15      |
| 31 | 80.15  | 4425    | 0.36      | 100 | 149.20 | 524     | 0.04      | 169 | 218.20 | 431     | 0.03      |
| 32 | 81.10  | 18788   | 1.52      | 101 | 150.25 | 768     | 0.06      | 170 | 219.25 | 888     | 0.07      |
| 33 | 82.15  | 6220    | 0.50      | 102 | 151.15 | 3815    | 0.31      | 171 | 220.30 | 226     | 0.02      |
| 34 | 83.15  | 31274   | 2.53      | 103 | 152.20 | 1241    | 0.10      | 172 | 221.30 | 362     | 0.03      |
| 35 | 84.15  | 8991    | 0.73      | 104 | 153.25 | 2176    | 0.18      | 173 | 222.10 | 444     | 0.04      |
| 36 | 85.15  | 32933   | 2.66      | 105 | 154.25 | 1750    | 0.14      | 174 | 223.05 | 502     | 0.04      |
| 37 | 86.15  | 22687   | 1.84      | 106 | 155.20 | 4334    | 0.35      | 175 | 224.10 | 748     | 0.06      |
| 38 | 87.15  | 175790  | 14.22     | 107 | 156.15 | 1810    | 0.15      | 176 | 225.20 | 826     | 0.07      |
| 39 | 88.15  | 11668   | 0.94      | 108 | 157.25 | 3483    | 0.28      | 177 | 226.15 | 1951    | 0.16      |
| 40 | 89.15  | 19847   | 1.61      | 109 | 158.25 | 2669    | 0.22      | 178 | 227.25 | 2247    | 0.18      |
| 41 | 90.15  | 3460    | 0.28      | 110 | 159.20 | 18396   | 1.49      | 179 | 228.15 | 2010    | 0.16      |
| 42 | 91.10  | 8958    | 0.72      | 111 | 160.20 | 2502    | 0.20      | 180 | 229.15 | 2126    | 0.17      |
| 43 | 92.25  | 2326    | 0.19      | 112 | 161.20 | 4391    | 0.36      | 181 | 230.10 | 3233    | 0.26      |
| 44 | 93.15  | 4945    | 0.40      | 113 | 162.15 | 562     | 0.05      | 182 | 231.30 | 1500    | 0.12      |
| 45 | 94.20  | 6799    | 0.55      | 114 | 163.15 | 601     | 0.05      | 183 | 232.25 | 751     | 0.06      |
| 46 | 95.15  | 17605   | 1.42      | 115 | 164.05 | 1041    | 0.08      | 184 | 233.25 | 1206    | 0.10      |
| 47 | 96.25  | 6501    | 0.53      | 116 | 165.15 | 911     | 0.07      | 185 | 234.30 | 623     | 0.05      |
| 48 | 97.15  | 21616   | 1.75      | 117 | 166.15 | 916     | 0.07      | 186 | 235.30 | 537     | 0.04      |
| 49 | 98.25  | 10122   | 0.82      | 118 | 167.15 | 2014    | 0.16      | 187 | 237.30 | 343     | 0.03      |
| 50 | 99.20  | 43671   | 3.53      | 119 | 168.15 | 2058    | 0.17      | 188 | 238.20 | 457     | 0.04      |
| 51 | 100.25 | 31258   | 2.53      | 120 | 169.15 | 6783    | 0.55      | 189 | 239.20 | 786     | 0.06      |
| 52 | 101.15 | 153243  | 12.40     | 121 | 170.15 | 3140    | 0.25      | 190 | 240.15 | 1168    | 0.09      |
| 53 | 102.25 | 24631   | 1.99      | 122 | 171.20 | 4726    | 0.38      | 191 | 241.15 | 1605    | 0.13      |
| 54 | 103.20 | 126102  | 10.20     | 123 | 172.25 | 2644    | 0.21      | 192 | 242.15 | 1190    | 0.10      |
| 55 | 104.20 | 9614    | 0.78      | 124 | 173.25 | 5320    | 0.43      | 193 | 243.15 | 2822    | 0.23      |
| 56 | 105.15 | 3811    | 0.31      | 125 | 174.35 | 2414    | 0.20      | 194 | 244.15 | 1111    | 0.09      |
| 57 | 106.25 | 4406    | 0.36      | 126 | 175.25 | 11526   | 0.93      | 195 | 245.20 | 1655    | 0.13      |
| 58 | 107.15 | 31609   | 2.56      | 127 | 176.25 | 1872    | 0.15      | 196 | 246.35 | 792     | 0.06      |
| 59 | 108.20 | 4266    | 0.35      | 128 | 177.20 | 1862    | 0.15      | 197 | 247.30 | 7518    | 0.61      |
| 60 | 109.20 | 4473    | 0.36      | 129 | 178.15 | 463     | 0.04      | 198 | 248.25 | 2307    | 0.19      |
| 61 | 110.25 | 3933    | 0.32      | 130 | 179.20 | 351     | 0.03      | 199 | 249.20 | 607     | 0.05      |
| 62 | 111.20 | 20081   | 1.62      | 131 | 180.20 | 449     | 0.04      | 200 | 250.20 | 201     | 0.02      |
| 63 | 112.25 | 23111   | 1.87      | 132 | 181.20 | 618     | 0.05      | 201 | 251.30 | 1330    | 0.11      |
| 64 | 113.20 | 181367  | 14.68     | 133 | 182.10 | 582     | 0.05      | 202 | 252.30 | 372     | 0.03      |
| 65 | 114.25 | 32131   | 2.60      | 134 | 183.20 | 1009    | 0.08      | 203 | 253.30 | 346     | 0.03      |
| 66 | 115.20 | 56626   | 4.58      | 135 | 184.15 | 771     | 0.06      | 204 | 254.30 | 282     | 0.02      |
| 67 | 116.25 | 32977   | 2.67      | 136 | 185.20 | 1758    | 0.14      | 205 | 255.15 | 530     | 0.04      |
| 68 | 117.20 | 203367  | 16.46     | 137 | 186.25 | 2042    | 0.17      | 206 | 256.20 | 398     | 0.03      |
| 69 | 118.20 | 16386   | 1.33      | 138 | 187.20 | 2170    | 0.18      | 207 | 257.20 | 1063    | 0.09      |
| 70 | 119.20 | 7193    | 0.58      | 139 | 188.25 | 1449    | 0.12      | 208 | 258.35 | 802     | 0.06      |
| 71 | 120.20 | 1370    | 0.11      | 140 | 189.25 | 13930   | 1.13      | 209 | 259.30 | 5948    | 0.48      |
| 72 | 121.25 | 1279    | 0.10      | 141 | 190.15 | 2482    | 0.20      | 210 | 260.25 | 1128    | 0.09      |
| 73 | 122.20 | 641     | 0.05      | 142 | 191.25 | 1682    | 0.14      | 211 | 261.30 | 1122    | 0.09      |
| 74 | 123.20 | 1988    | 0.16      | 143 | 192.35 | 657     | 0.05      | 212 | 262.30 | 423     | 0.03      |
| 75 | 124.25 | 935     | 0.08      | 144 | 193.30 | 4294    | 0.35      | 213 | 263.30 | 452     | 0.04      |
| 76 | 125.25 | 3399    | 0.28      | 145 | 194.25 | 982     | 0.08      | 214 | 265.30 | 354     | 0.03      |
| 77 | 126.25 | 5894    | 0.48      | 146 | 195.05 | 1093    | 0.09      | 215 | 269.30 | 262     | 0.02      |
| 78 | 127.25 | 20610   | 1.67      | 147 | 196.05 | 1690    | 0.14      | 216 | 270.30 | 220     | 0.02      |

| #   | m/z    | Abs. In | Rel. Int. | #   | m/z    | Abs. In | Rel. Int. | #   | m/z    | Abs. In | Rel. Int. |
|-----|--------|---------|-----------|-----|--------|---------|-----------|-----|--------|---------|-----------|
| 217 | 271.30 | 897     | 0.07      | 236 | 305.40 | 5145    | 0.42      | 255 | 361.35 | 496     | 0.04      |
| 218 | 272.30 | 358     | 0.03      | 237 | 306.35 | 1560    | 0.13      | 256 | 362.30 | 1012    | 0.08      |
| 219 | 273.40 | 642     | 0.05      | 238 | 307.40 | 399     | 0.03      | 257 | 363.35 | 1701    | 0.14      |
| 220 | 274.40 | 302     | 0.02      | 239 | 309.40 | 244     | 0.02      | 258 | 364.30 | 2038    | 0.16      |
| 221 | 275.40 | 406     | 0.03      | 240 | 316.40 | 233     | 0.02      | 259 | 365.25 | 907     | 0.07      |
| 222 | 276.40 | 212     | 0.02      | 241 | 317.40 | 1713    | 0.14      | 260 | 366.30 | 455     | 0.04      |
| 223 | 277.20 | 591     | 0.05      | 242 | 318.40 | 458     | 0.04      | 261 | 367.30 | 238     | 0.02      |
| 224 | 283.20 | 225     | 0.02      | 243 | 319.40 | 343     | 0.03      | 262 | 374.30 | 204     | 0.02      |
| 225 | 285.40 | 577     | 0.05      | 244 | 321.40 | 233     | 0.02      | 263 | 375.50 | 628     | 0.05      |
| 226 | 286.40 | 340     | 0.03      | 245 | 323.40 | 308     | 0.02      | 264 | 376.50 | 380     | 0.03      |
| 227 | 287.40 | 542     | 0.04      | 246 | 329.40 | 319     | 0.03      | 265 | 377.50 | 298     | 0.02      |
| 228 | 288.40 | 244     | 0.02      | 247 | 331.40 | 287     | 0.02      | 266 | 378.40 | 642     | 0.05      |
| 229 | 289.35 | 635     | 0.05      | 248 | 333.40 | 338     | 0.03      | 267 | 379.40 | 314     | 0.03      |
| 230 | 290.30 | 287     | 0.02      | 249 | 335.40 | 244     | 0.02      | 268 | 380.40 | 204     | 0.02      |
| 231 | 291.30 | 382     | 0.03      | 250 | 343.40 | 202     | 0.02      | 269 | 405.40 | 286     | 0.02      |
| 232 | 293.30 | 308     | 0.02      | 251 | 346.40 | 247     | 0.02      | 270 | 596.40 | 217     | 0.02      |
| 233 | 301.30 | 255     | 0.02      | 252 | 347.40 | 462     | 0.04      | 271 | 726.40 | 231     | 0.02      |
| 234 | 303.45 | 574     | 0.05      | 253 | 348.40 | 247     | 0.02      | 272 | 728.40 | 281     | 0.02      |
| 235 | 304.40 | 390     | 0.03      | 254 | 360.40 | 358     | 0.03      | 273 | 729.40 | 209     | 0.02      |

Mass chart of compound 10

4,4'-((diselanediylbis(2-(methoxycarbonyl)-4,1-phenylene)) bis(azanediyl)) bis (4-oxobutanoic acid (**11**).

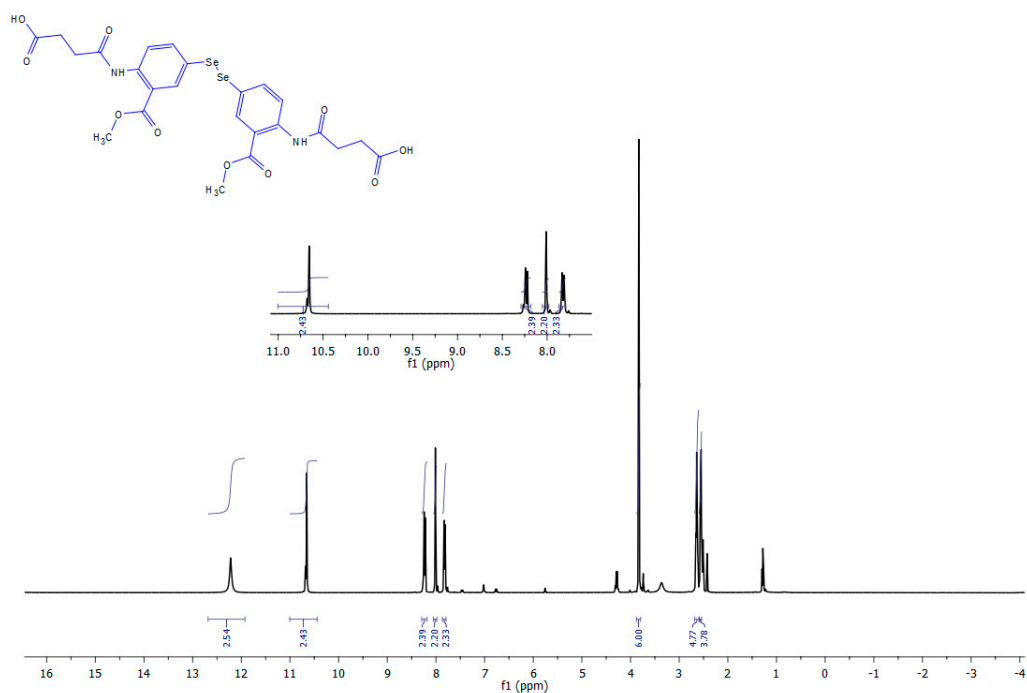

Figure S29. <sup>1</sup>H NMR chart of compound **11**

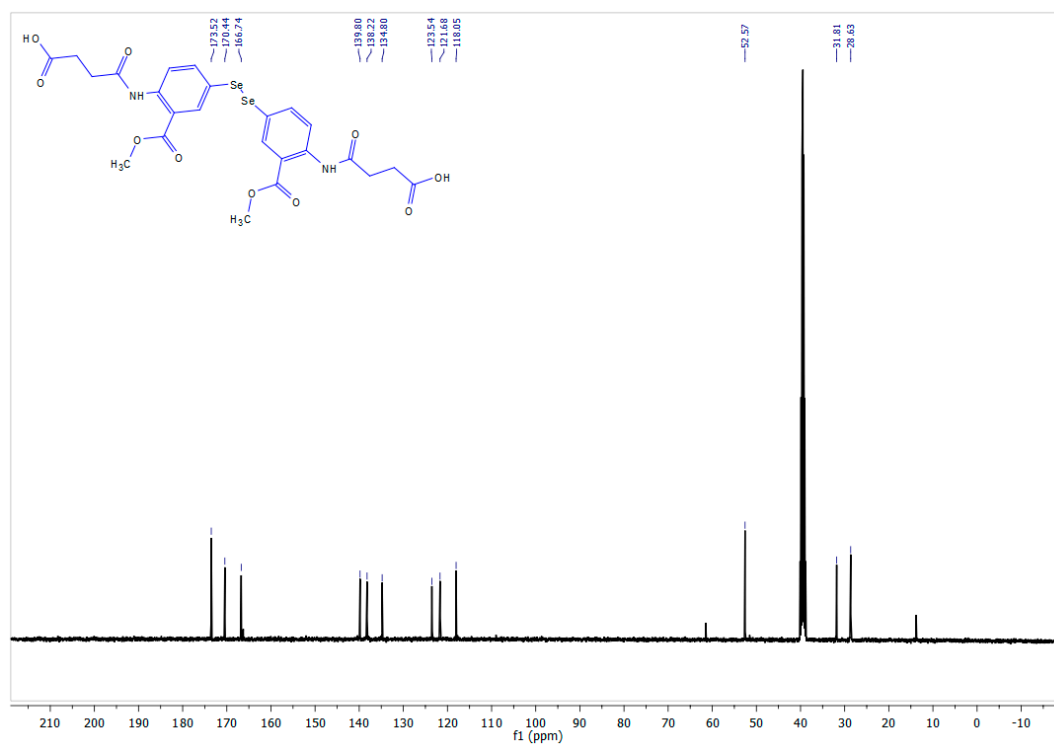

Figure S30. <sup>13</sup>C NMR chart of compound **11**

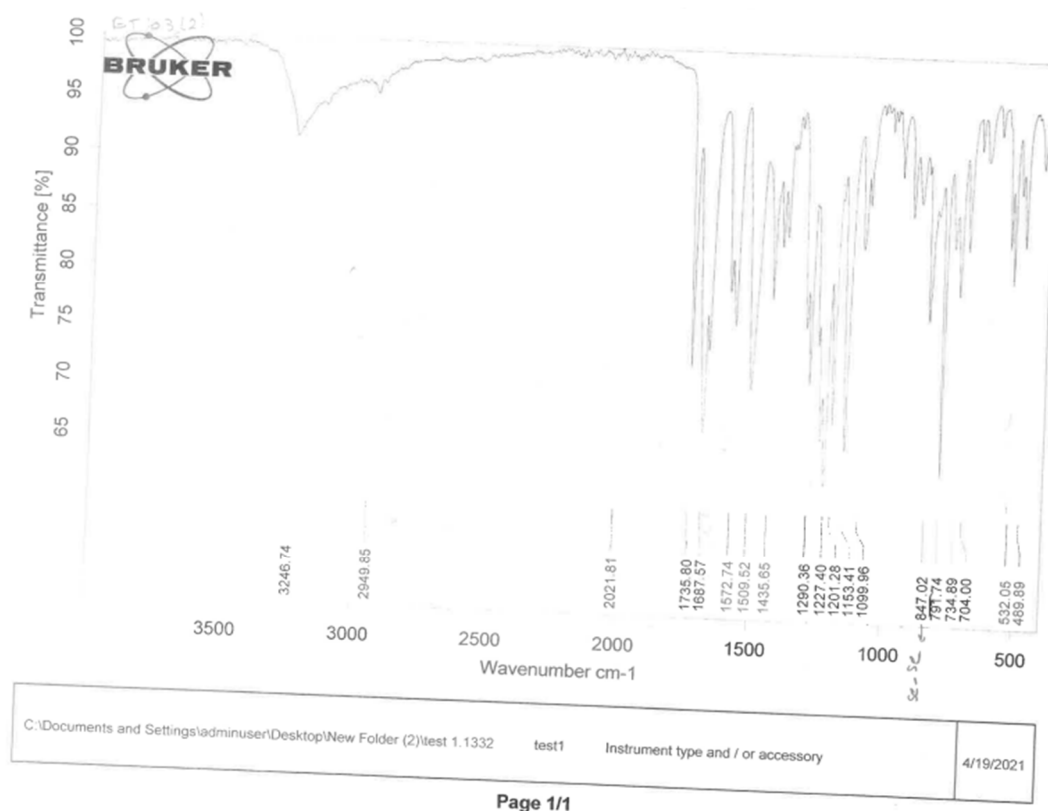

**Figure S31.** IR chart of compound **11**



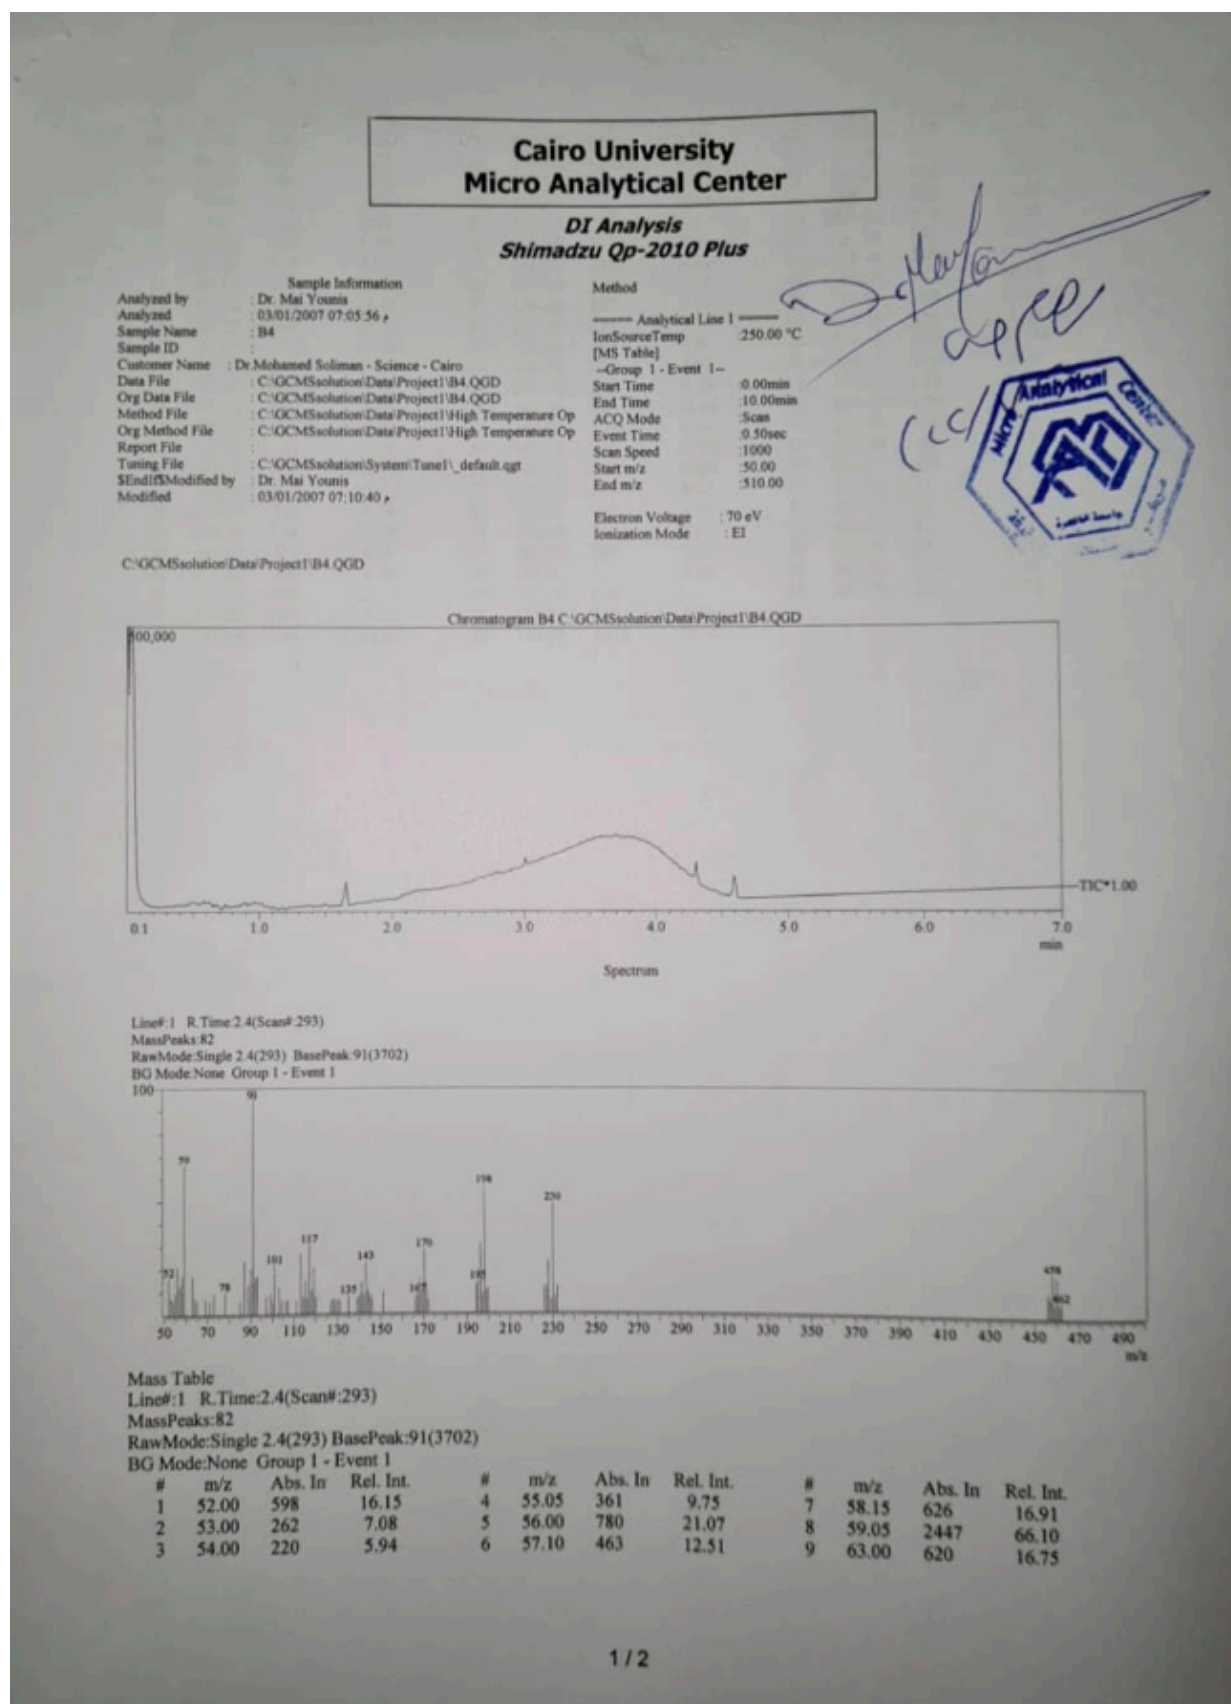

**Figure S32. Mass chart of compound 11**

| #  | m/z    | Abs. In | Rel. Int. | #  | m/z    | Abs. In | Rel. Int. | #  | m/z    | Abs. In | Rel. Int. |
|----|--------|---------|-----------|----|--------|---------|-----------|----|--------|---------|-----------|
| 10 | 64.00  | 270     | 7.29      | 35 | 116.10 | 262     | 7.08      | 60 | 170.95 | 510     | 13.78     |
| 11 | 65.00  | 234     | 6.32      | 36 | 117.10 | 1126    | 30.42     | 61 | 172.00 | 222     | 6.00      |
| 12 | 69.00  | 254     | 6.86      | 37 | 118.10 | 388     | 10.48     | 62 | 194.05 | 462     | 12.48     |
| 13 | 71.00  | 220     | 5.94      | 38 | 119.10 | 758     | 20.48     | 63 | 195.05 | 505     | 13.64     |
| 14 | 73.00  | 335     | 9.05      | 39 | 120.10 | 289     | 7.81      | 64 | 196.05 | 1148    | 31.01     |
| 15 | 78.00  | 354     | 9.56      | 40 | 127.10 | 217     | 5.86      | 65 | 197.05 | 314     | 8.48      |
| 16 | 85.00  | 222     | 6.00      | 41 | 128.10 | 244     | 6.59      | 66 | 198.00 | 2086    | 56.35     |
| 17 | 87.15  | 873     | 23.58     | 42 | 129.10 | 214     | 5.78      | 67 | 198.95 | 381     | 10.29     |
| 18 | 89.10  | 486     | 13.13     | 43 | 130.10 | 247     | 6.67      | 68 | 199.90 | 409     | 11.05     |
| 19 | 90.15  | 748     | 20.21     | 44 | 131.10 | 212     | 5.73      | 69 | 226.15 | 416     | 11.24     |
| 20 | 91.15  | 3702    | 100.00    | 45 | 135.10 | 287     | 7.75      | 70 | 227.10 | 439     | 11.86     |
| 21 | 92.20  | 594     | 16.05     | 46 | 139.10 | 258     | 6.97      | 71 | 228.10 | 846     | 22.85     |
| 22 | 93.05  | 632     | 17.07     | 47 | 140.10 | 303     | 8.18      | 72 | 229.10 | 215     | 5.81      |
| 23 | 97.10  | 292     | 7.89      | 48 | 141.00 | 505     | 13.64     | 73 | 230.05 | 1796    | 48.51     |
| 24 | 99.10  | 335     | 9.05      | 49 | 142.00 | 314     | 8.48      | 74 | 231.10 | 278     | 7.51      |
| 25 | 100.10 | 218     | 5.89      | 50 | 143.05 | 840     | 22.69     | 75 | 232.10 | 430     | 11.62     |
| 26 | 101.10 | 798     | 21.56     | 51 | 144.00 | 372     | 10.05     | 76 | 456.20 | 398     | 10.75     |
| 27 | 103.20 | 449     | 12.13     | 52 | 145.00 | 313     | 8.45      | 77 | 457.20 | 319     | 8.62      |
| 28 | 104.20 | 231     | 6.24      | 53 | 146.00 | 249     | 6.73      | 78 | 458.25 | 706     | 19.07     |
| 29 | 106.20 | 214     | 5.78      | 54 | 151.00 | 358     | 9.67      | 79 | 459.20 | 209     | 5.65      |
| 30 | 107.20 | 233     | 6.29      | 55 | 166.00 | 284     | 7.67      | 80 | 460.20 | 654     | 17.67     |
| 31 | 111.20 | 206     | 5.56      | 56 | 167.00 | 297     | 8.02      | 81 | 461.20 | 204     | 5.51      |
| 32 | 113.15 | 978     | 26.42     | 57 | 168.00 | 606     | 16.37     | 82 | 462.20 | 249     | 6.73      |
| 33 | 114.20 | 276     | 7.46      | 58 | 169.05 | 320     | 8.64      |    |        |         |           |
| 34 | 115.15 | 543     | 14.67     | 59 | 170.05 | 1038    | 28.04     |    |        |         |           |

*Dimethyl 5,5'-diselanediyldis(2-(2,5-dioxopyrrolidin-1-yl) benzoate (12).*

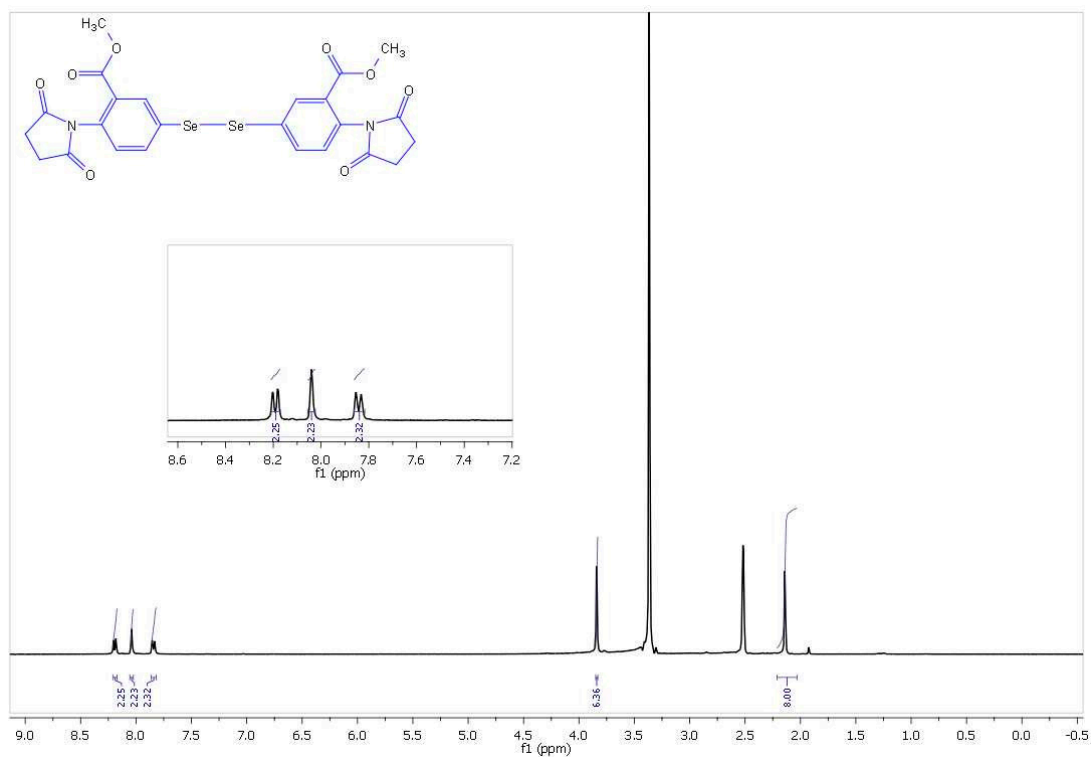

**Figure S33.** <sup>1</sup>H NMR chart of compound 12

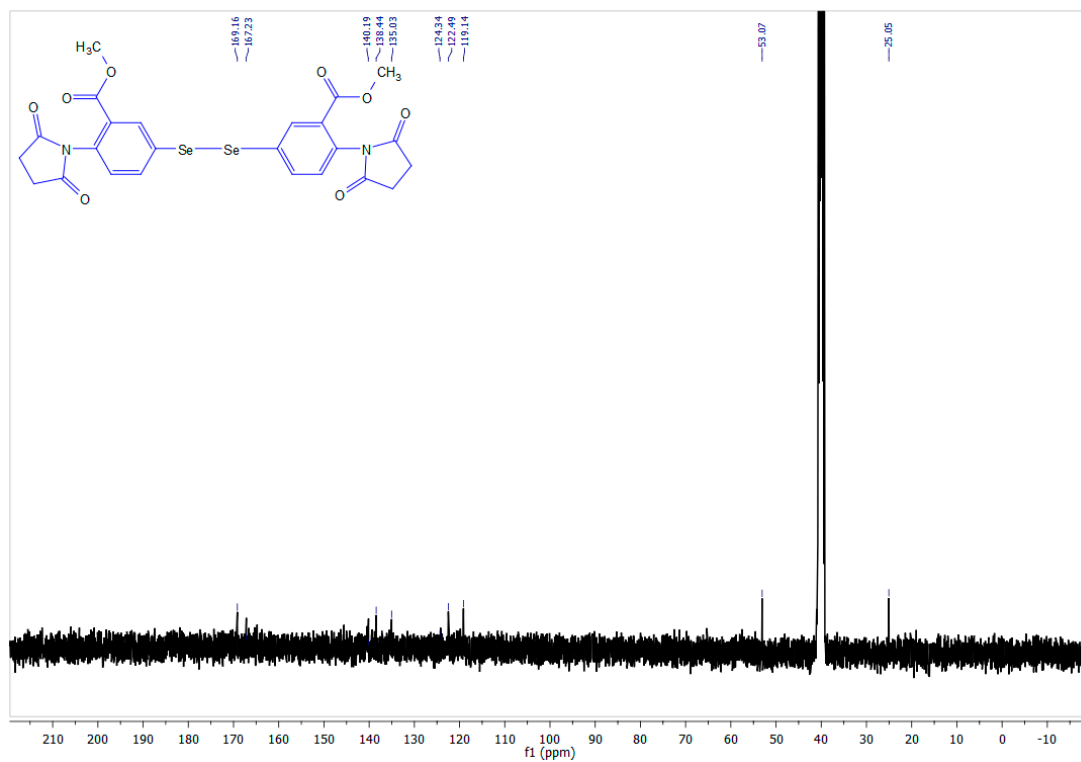

**Figure S34.** <sup>13</sup>C NMR chart of compound 12



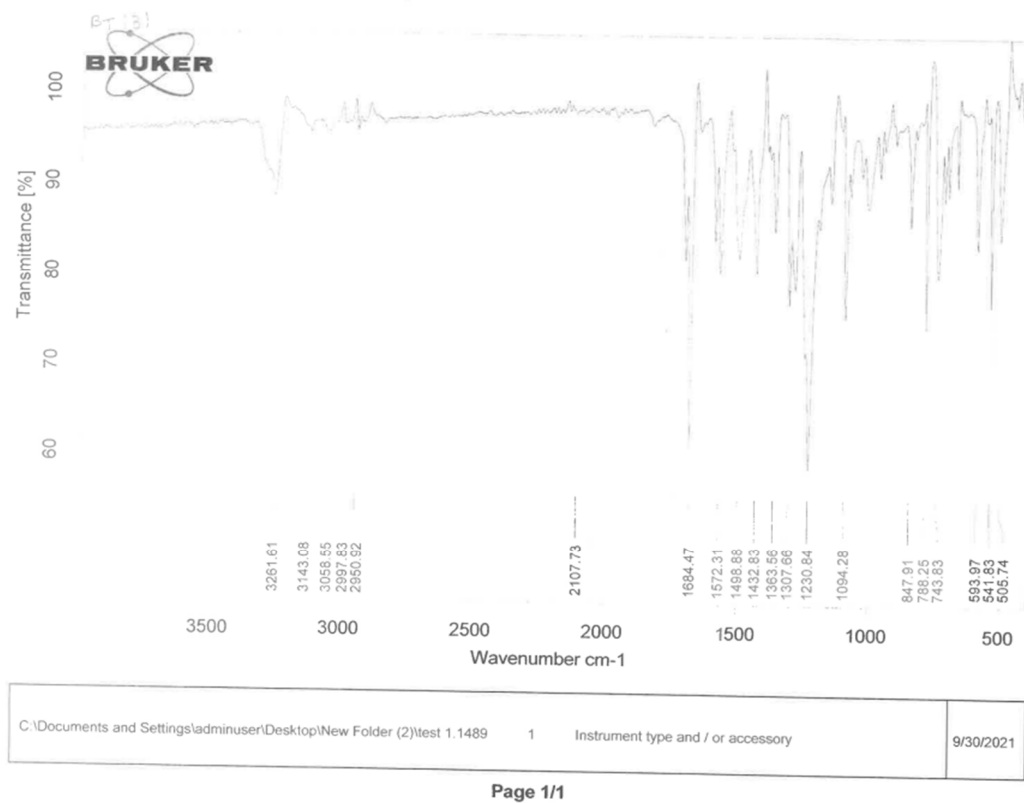

**Figure S35.** IR chart of compound **12**

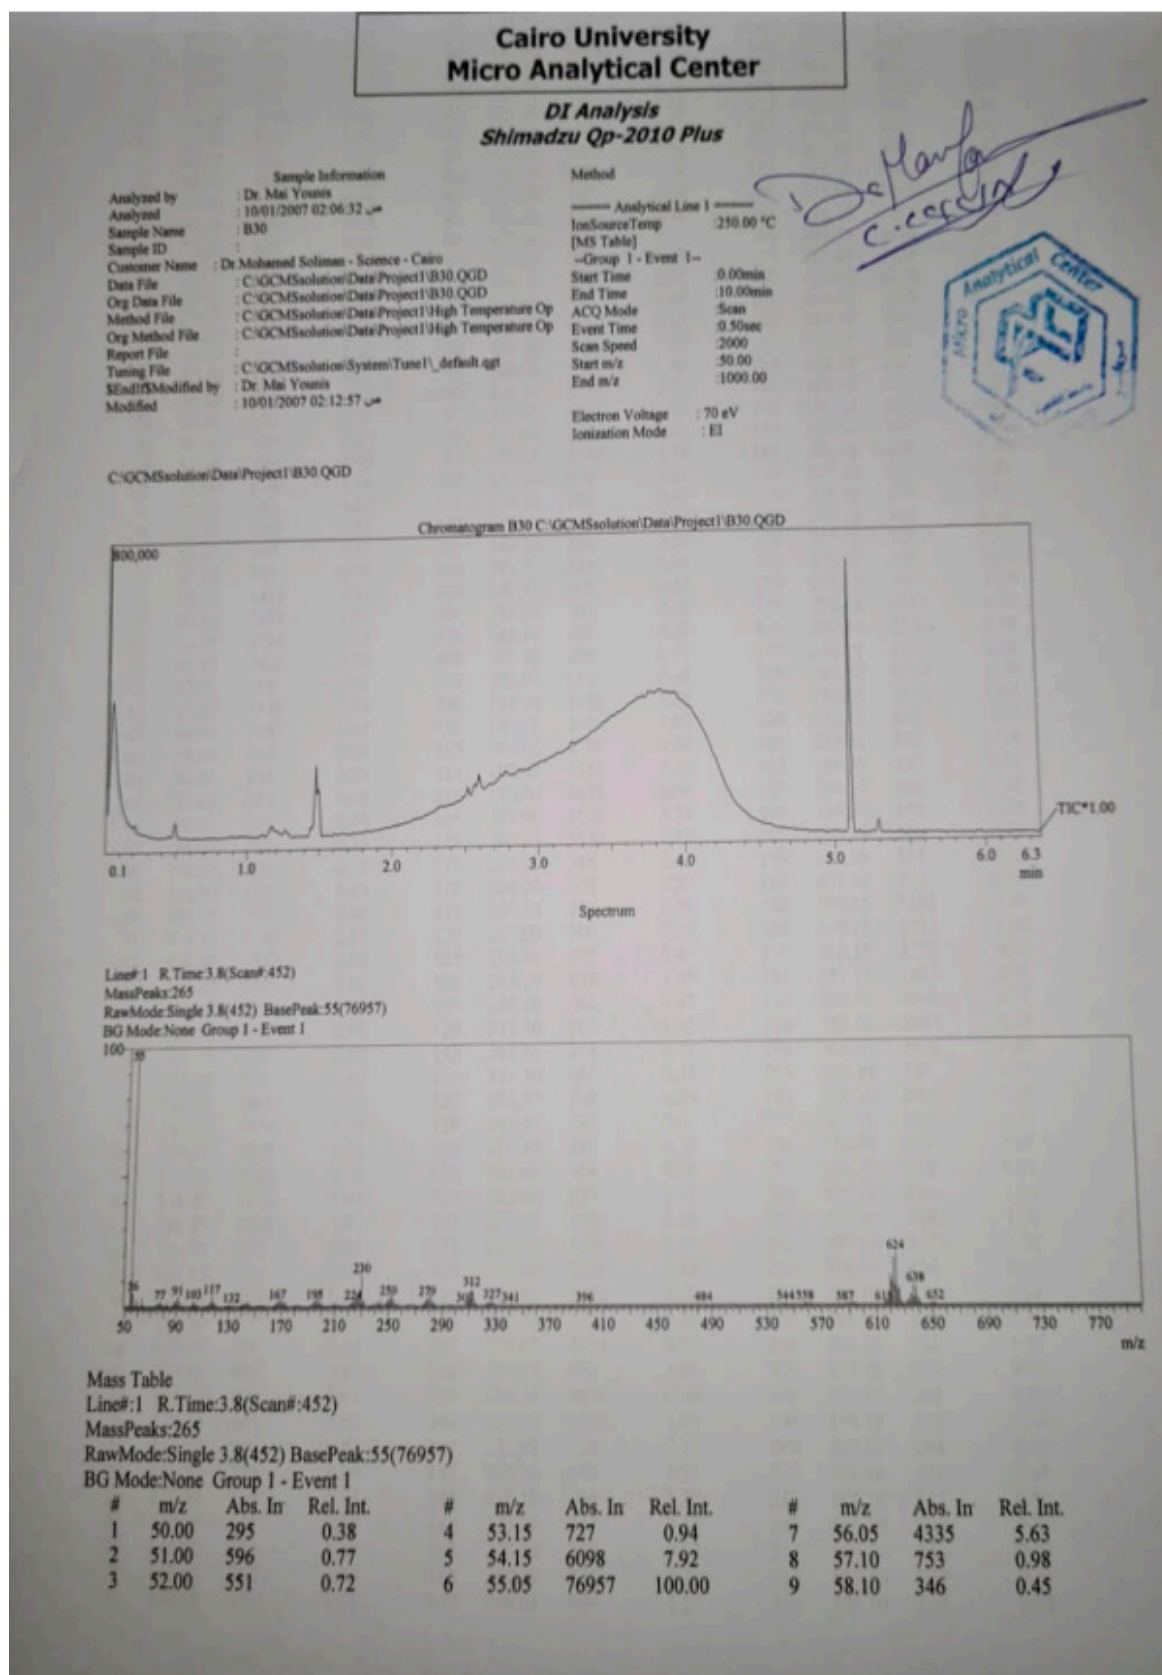

Figure S36. Mass chart of compound 12

| #  | m/z    | Abs. In | Rel. Int. | #   | m/z    | Abs. In | Rel. Int. | #   | m/z    | Abs. In | Rel. Int. |
|----|--------|---------|-----------|-----|--------|---------|-----------|-----|--------|---------|-----------|
| 10 | 59.05  | 2361    | 3.07      | 79  | 144.15 | 948     | 1.23      | 148 | 241.15 | 534     | 0.69      |
| 11 | 60.05  | 769     | 1.00      | 80  | 145.10 | 1273    | 1.65      | 149 | 242.10 | 1250    | 1.62      |
| 12 | 61.10  | 284     | 0.37      | 81  | 146.15 | 770     | 1.00      | 150 | 243.10 | 390     | 0.51      |
| 13 | 62.15  | 847     | 1.10      | 82  | 148.10 | 226     | 0.29      | 151 | 244.10 | 1682    | 2.19      |
| 14 | 63.10  | 2718    | 3.53      | 83  | 151.10 | 551     | 0.72      | 152 | 245.10 | 369     | 0.48      |
| 15 | 64.10  | 796     | 1.03      | 84  | 152.10 | 236     | 0.31      | 153 | 246.10 | 542     | 0.70      |
| 16 | 65.10  | 623     | 0.81      | 85  | 153.10 | 394     | 0.51      | 154 | 247.10 | 399     | 0.52      |
| 17 | 66.10  | 353     | 0.46      | 86  | 154.10 | 369     | 0.48      | 155 | 248.10 | 938     | 1.22      |
| 18 | 67.10  | 374     | 0.49      | 87  | 155.10 | 340     | 0.44      | 156 | 249.05 | 1283    | 1.67      |
| 19 | 69.10  | 495     | 0.64      | 88  | 156.10 | 537     | 0.70      | 157 | 250.10 | 2476    | 3.22      |
| 20 | 70.10  | 338     | 0.44      | 89  | 157.10 | 406     | 0.53      | 158 | 251.15 | 1626    | 2.11      |
| 21 | 71.10  | 439     | 0.57      | 90  | 160.10 | 297     | 0.39      | 159 | 252.10 | 3532    | 4.59      |
| 22 | 73.20  | 650     | 0.84      | 91  | 164.10 | 234     | 0.30      | 160 | 253.05 | 2638    | 3.43      |
| 23 | 74.20  | 556     | 0.72      | 92  | 165.10 | 548     | 0.71      | 161 | 254.00 | 1634    | 2.12      |
| 24 | 75.10  | 860     | 1.12      | 93  | 166.05 | 806     | 1.05      | 162 | 255.05 | 588     | 0.76      |
| 25 | 76.10  | 1014    | 1.32      | 94  | 167.00 | 1514    | 1.97      | 163 | 256.15 | 586     | 0.76      |
| 26 | 77.10  | 1638    | 2.13      | 95  | 168.05 | 1127    | 1.46      | 164 | 258.10 | 322     | 0.42      |
| 27 | 78.10  | 1244    | 1.62      | 96  | 169.00 | 2329    | 3.03      | 165 | 263.10 | 228     | 0.30      |
| 28 | 79.10  | 572     | 0.74      | 97  | 170.05 | 1484    | 1.93      | 166 | 264.10 | 262     | 0.34      |
| 29 | 80.10  | 590     | 0.77      | 98  | 171.00 | 1124    | 1.46      | 167 | 265.10 | 487     | 0.63      |
| 30 | 81.10  | 446     | 0.58      | 99  | 172.10 | 1340    | 1.74      | 168 | 266.10 | 266     | 0.35      |
| 31 | 82.10  | 874     | 1.14      | 100 | 173.10 | 929     | 1.21      | 169 | 267.10 | 633     | 0.82      |
| 32 | 83.05  | 682     | 0.89      | 101 | 174.10 | 346     | 0.45      | 170 | 268.10 | 322     | 0.42      |
| 33 | 84.10  | 410     | 0.53      | 102 | 178.10 | 265     | 0.34      | 171 | 269.10 | 202     | 0.26      |
| 34 | 85.10  | 359     | 0.47      | 103 | 180.10 | 284     | 0.37      | 172 | 275.10 | 226     | 0.29      |
| 35 | 87.10  | 737     | 0.96      | 104 | 181.10 | 335     | 0.44      | 173 | 276.10 | 348     | 0.45      |
| 36 | 88.10  | 1428    | 1.86      | 105 | 182.10 | 406     | 0.53      | 174 | 277.15 | 1017    | 1.32      |
| 37 | 89.10  | 1534    | 1.99      | 106 | 183.10 | 303     | 0.39      | 175 | 278.15 | 1615    | 2.10      |
| 38 | 90.15  | 1794    | 2.33      | 107 | 184.10 | 527     | 0.68      | 176 | 279.10 | 2262    | 2.94      |
| 39 | 91.10  | 2926    | 3.80      | 108 | 192.10 | 390     | 0.51      | 177 | 280.15 | 1661    | 2.16      |
| 40 | 92.05  | 704     | 0.91      | 109 | 193.00 | 351     | 0.46      | 178 | 281.10 | 4306    | 5.60      |
| 41 | 93.05  | 1337    | 1.74      | 110 | 194.00 | 1180    | 1.53      | 179 | 282.05 | 1565    | 2.03      |
| 42 | 94.00  | 268     | 0.35      | 111 | 195.05 | 1476    | 1.92      | 180 | 283.15 | 821     | 1.07      |
| 43 | 95.00  | 506     | 0.66      | 112 | 196.00 | 2799    | 3.64      | 181 | 284.10 | 881     | 1.14      |
| 44 | 96.00  | 201     | 0.26      | 113 | 197.05 | 1155    | 1.50      | 182 | 286.10 | 247     | 0.32      |
| 45 | 97.00  | 354     | 0.46      | 114 | 198.00 | 4618    | 6.00      | 183 | 290.10 | 201     | 0.26      |
| 46 | 98.00  | 201     | 0.26      | 115 | 199.00 | 1033    | 1.34      | 184 | 294.10 | 215     | 0.28      |
| 47 | 99.00  | 233     | 0.30      | 116 | 200.05 | 1152    | 1.50      | 185 | 296.10 | 226     | 0.29      |
| 48 | 100.00 | 238     | 0.31      | 117 | 201.00 | 385     | 0.50      | 186 | 298.10 | 257     | 0.33      |
| 49 | 101.00 | 330     | 0.43      | 118 | 204.00 | 234     | 0.30      | 187 | 307.10 | 274     | 0.36      |
| 50 | 102.25 | 730     | 0.95      | 119 | 206.00 | 239     | 0.31      | 188 | 308.15 | 1182    | 1.54      |
| 51 | 103.15 | 1742    | 2.26      | 120 | 207.00 | 300     | 0.39      | 189 | 309.15 | 1355    | 1.76      |
| 52 | 104.20 | 1383    | 1.80      | 121 | 208.00 | 337     | 0.44      | 190 | 310.15 | 3102    | 4.03      |
| 53 | 105.10 | 663     | 0.86      | 122 | 209.10 | 825     | 1.07      | 191 | 311.15 | 1824    | 2.37      |
| 54 | 106.10 | 506     | 0.66      | 123 | 210.10 | 361     | 0.47      | 192 | 312.15 | 4948    | 6.43      |
| 55 | 107.10 | 458     | 0.60      | 124 | 211.10 | 886     | 1.15      | 193 | 313.10 | 2505    | 3.26      |
| 56 | 111.10 | 226     | 0.29      | 125 | 212.10 | 314     | 0.41      | 194 | 314.10 | 1455    | 1.89      |
| 57 | 113.20 | 519     | 0.67      | 126 | 213.10 | 265     | 0.34      | 195 | 315.10 | 545     | 0.71      |
| 58 | 114.20 | 394     | 0.51      | 127 | 214.10 | 278     | 0.36      | 196 | 316.10 | 249     | 0.32      |
| 59 | 115.15 | 1136    | 1.48      | 128 | 216.10 | 236     | 0.31      | 197 | 322.10 | 252     | 0.33      |
| 60 | 116.15 | 1241    | 1.61      | 129 | 220.10 | 252     | 0.33      | 198 | 323.20 | 628     | 0.82      |
| 61 | 117.15 | 3180    | 4.13      | 130 | 221.00 | 454     | 0.59      | 199 | 324.20 | 718     | 0.93      |
| 62 | 118.10 | 1263    | 1.64      | 131 | 222.00 | 855     | 1.11      | 200 | 325.15 | 816     | 1.06      |
| 63 | 119.15 | 1086    | 1.41      | 132 | 223.05 | 1068    | 1.39      | 201 | 326.10 | 1060    | 1.38      |
| 64 | 120.10 | 703     | 0.91      | 133 | 223.95 | 1204    | 1.56      | 202 | 327.15 | 1320    | 1.72      |
| 65 | 121.10 | 226     | 0.29      | 134 | 225.05 | 2025    | 2.63      | 203 | 328.10 | 436     | 0.57      |
| 66 | 127.10 | 294     | 0.38      | 135 | 226.00 | 2782    | 3.62      | 204 | 329.10 | 412     | 0.54      |
| 67 | 128.10 | 294     | 0.38      | 136 | 227.10 | 2271    | 2.95      | 205 | 341.10 | 270     | 0.35      |
| 68 | 129.10 | 497     | 0.65      | 137 | 228.05 | 4414    | 5.74      | 206 | 396.10 | 212     | 0.28      |
| 69 | 130.10 | 482     | 0.63      | 138 | 229.15 | 955     | 1.24      | 207 | 484.10 | 223     | 0.29      |
| 70 | 131.10 | 473     | 0.61      | 139 | 230.05 | 8970    | 11.66     | 208 | 533.10 | 246     | 0.32      |
| 71 | 132.20 | 641     | 0.83      | 140 | 231.05 | 1386    | 1.80      | 209 | 534.10 | 217     | 0.28      |
| 72 | 133.20 | 566     | 0.74      | 141 | 232.05 | 1683    | 2.19      | 210 | 540.10 | 254     | 0.33      |
| 73 | 136.20 | 225     | 0.29      | 142 | 233.10 | 270     | 0.35      | 211 | 542.10 | 374     | 0.49      |
| 74 | 139.20 | 554     | 0.72      | 143 | 236.10 | 206     | 0.27      | 212 | 544.10 | 433     | 0.56      |
| 75 | 140.10 | 521     | 0.68      | 144 | 237.10 | 367     | 0.48      | 213 | 545.10 | 276     | 0.36      |
| 76 | 141.10 | 903     | 1.17      | 145 | 238.10 | 250     | 0.32      | 214 | 556.10 | 252     | 0.33      |
| 77 | 142.05 | 880     | 1.14      | 146 | 239.00 | 276     | 0.36      | 215 | 557.10 | 330     | 0.43      |
| 78 | 143.10 | 1281    | 1.66      | 147 | 240.05 | 904     | 1.17      | 216 | 558.10 | 521     | 0.68      |

Mass chart of compound 12

| #   | m/z    | Abs. In | Rel. Int. | #   | m/z    | Abs. In | Rel. Int. | #   | m/z    | Abs. In | Rel. Int. |
|-----|--------|---------|-----------|-----|--------|---------|-----------|-----|--------|---------|-----------|
| 217 | 559.10 | 444     | 0.58      | 234 | 617.15 | 1317    | 1.71      | 251 | 634.20 | 3026    | 3.93      |
| 218 | 560.10 | 386     | 0.50      | 235 | 618.20 | 3140    | 4.08      | 252 | 635.25 | 2389    | 3.10      |
| 219 | 561.10 | 442     | 0.57      | 236 | 619.25 | 2905    | 3.77      | 253 | 636.25 | 5588    | 7.26      |
| 220 | 562.10 | 348     | 0.45      | 237 | 620.20 | 8630    | 11.21     | 254 | 637.20 | 2172    | 2.82      |
| 221 | 563.10 | 326     | 0.42      | 238 | 621.20 | 6727    | 8.74      | 255 | 638.20 | 5702    | 7.41      |
| 222 | 566.10 | 202     | 0.26      | 239 | 622.20 | 13474   | 17.51     | 256 | 639.20 | 1810    | 2.35      |
| 223 | 587.10 | 239     | 0.31      | 240 | 623.20 | 5658    | 7.35      | 257 | 640.20 | 1945    | 2.53      |
| 224 | 588.10 | 202     | 0.26      | 241 | 624.20 | 14886   | 19.34     | 258 | 641.20 | 566     | 0.74      |
| 225 | 589.10 | 287     | 0.37      | 242 | 625.20 | 4374    | 5.68      | 259 | 642.20 | 327     | 0.42      |
| 226 | 590.10 | 318     | 0.41      | 243 | 626.20 | 4846    | 6.30      | 260 | 648.20 | 294     | 0.38      |
| 227 | 591.10 | 550     | 0.71      | 244 | 627.20 | 1631    | 2.12      | 261 | 649.20 | 425     | 0.55      |
| 228 | 592.10 | 244     | 0.32      | 245 | 628.20 | 578     | 0.75      | 262 | 650.20 | 466     | 0.61      |
| 229 | 593.20 | 690     | 0.90      | 246 | 629.20 | 281     | 0.37      | 263 | 651.20 | 258     | 0.34      |
| 230 | 594.20 | 249     | 0.32      | 247 | 630.20 | 300     | 0.39      | 264 | 652.20 | 598     | 0.78      |
| 231 | 595.20 | 326     | 0.42      | 248 | 631.20 | 550     | 0.71      | 265 | 653.20 | 214     | 0.28      |
| 232 | 615.20 | 217     | 0.28      | 249 | 632.25 | 1257    | 1.63      |     |        |         |           |
| 233 | 616.25 | 961     | 1.25      | 250 | 633.25 | 1235    | 1.60      |     |        |         |           |

Mass chart of compound **12**

(2Z,2'Z)-4,4'-((diselanediylbis(2-(methoxycarbonyl)-4,1-phenylene)) bis(azanediyl)) bis (4-oxobut-2-enoic acid) (13).

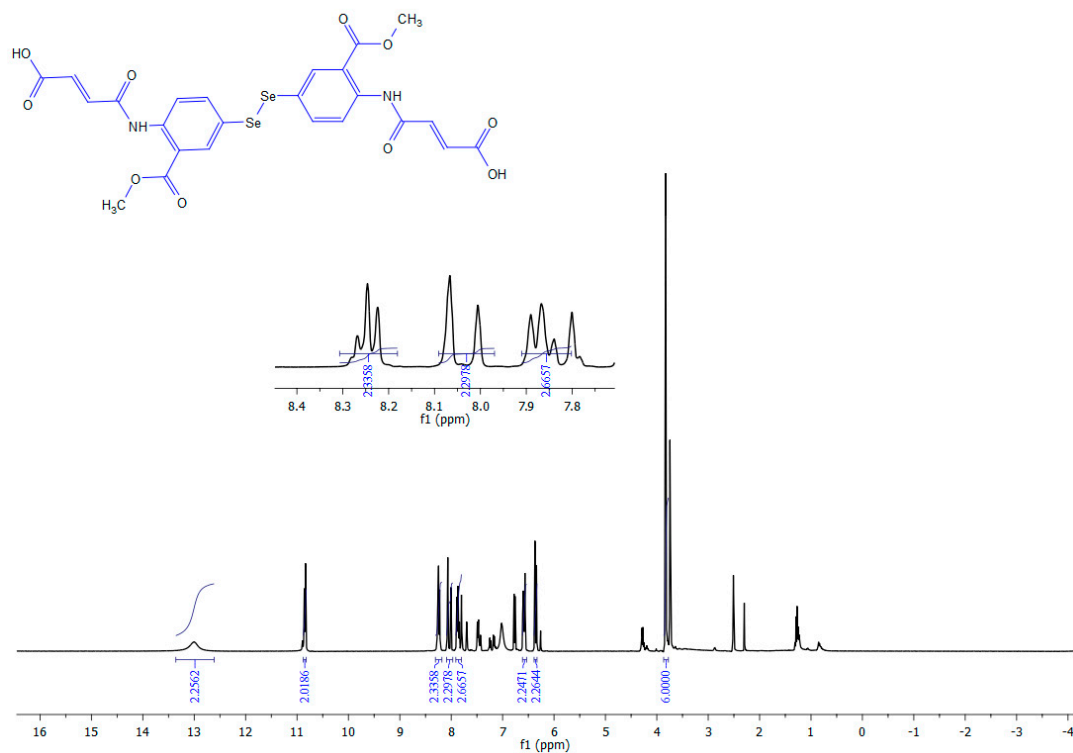

Figure S37. <sup>1</sup>H NMR chart of compound 13

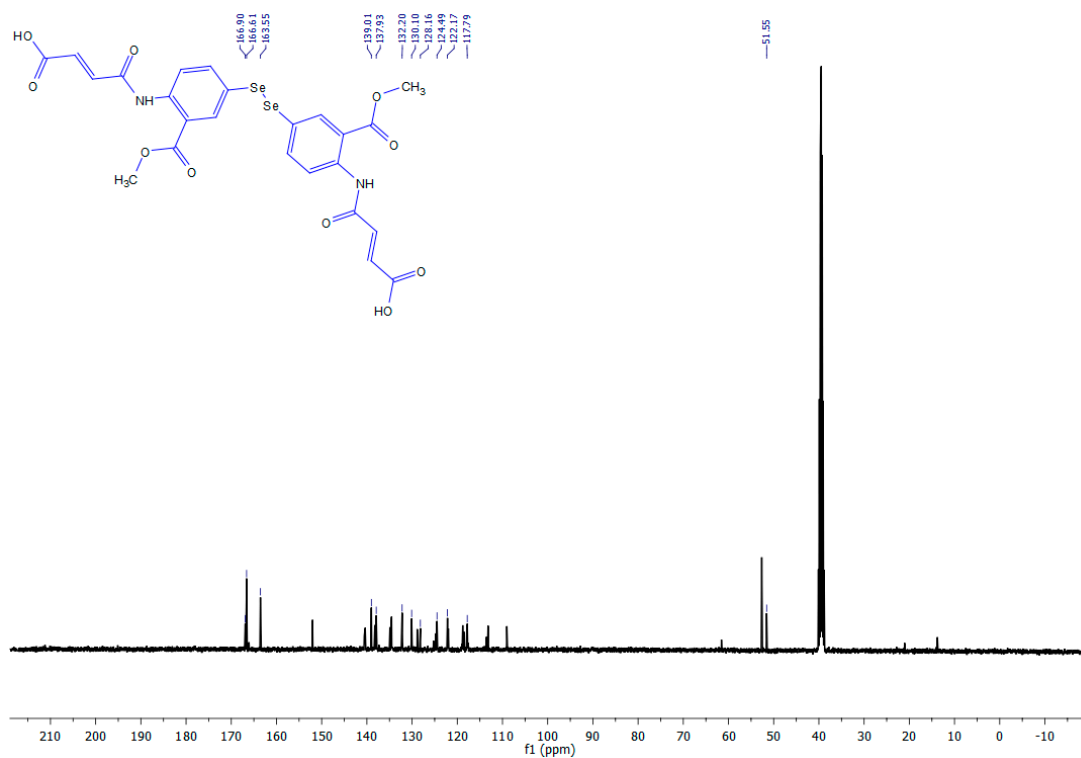

Figure S38. <sup>13</sup>C NMR chart of compound 13

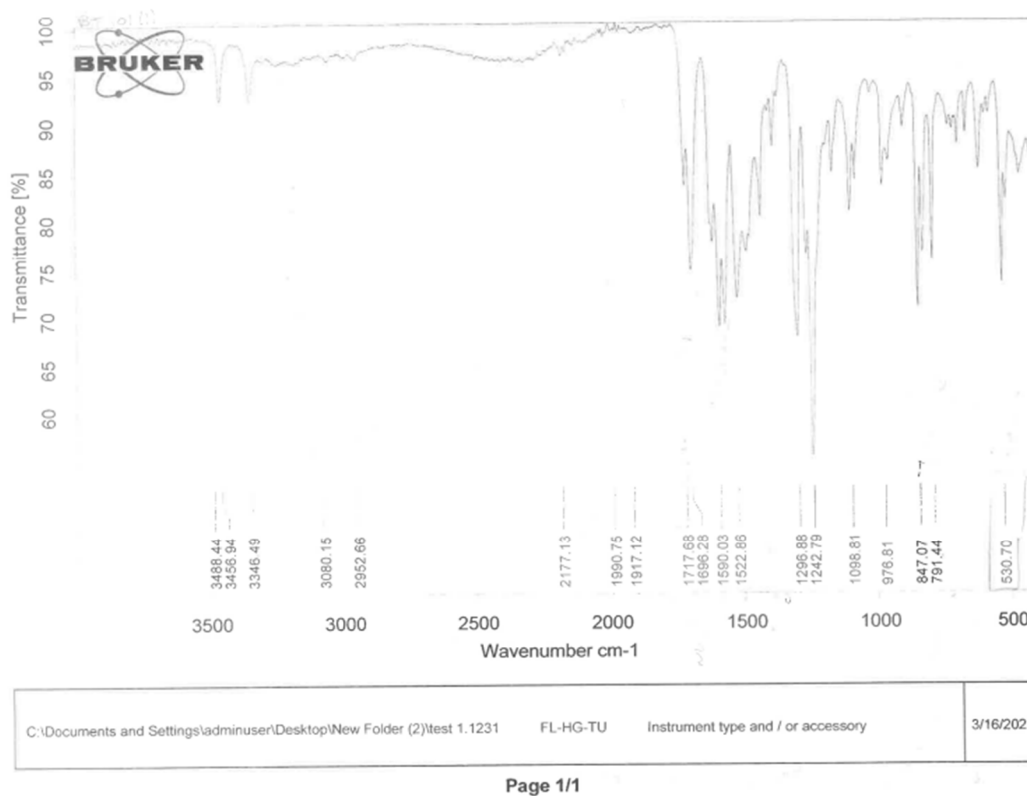

**Figure S39.** IR chart of compound **13**



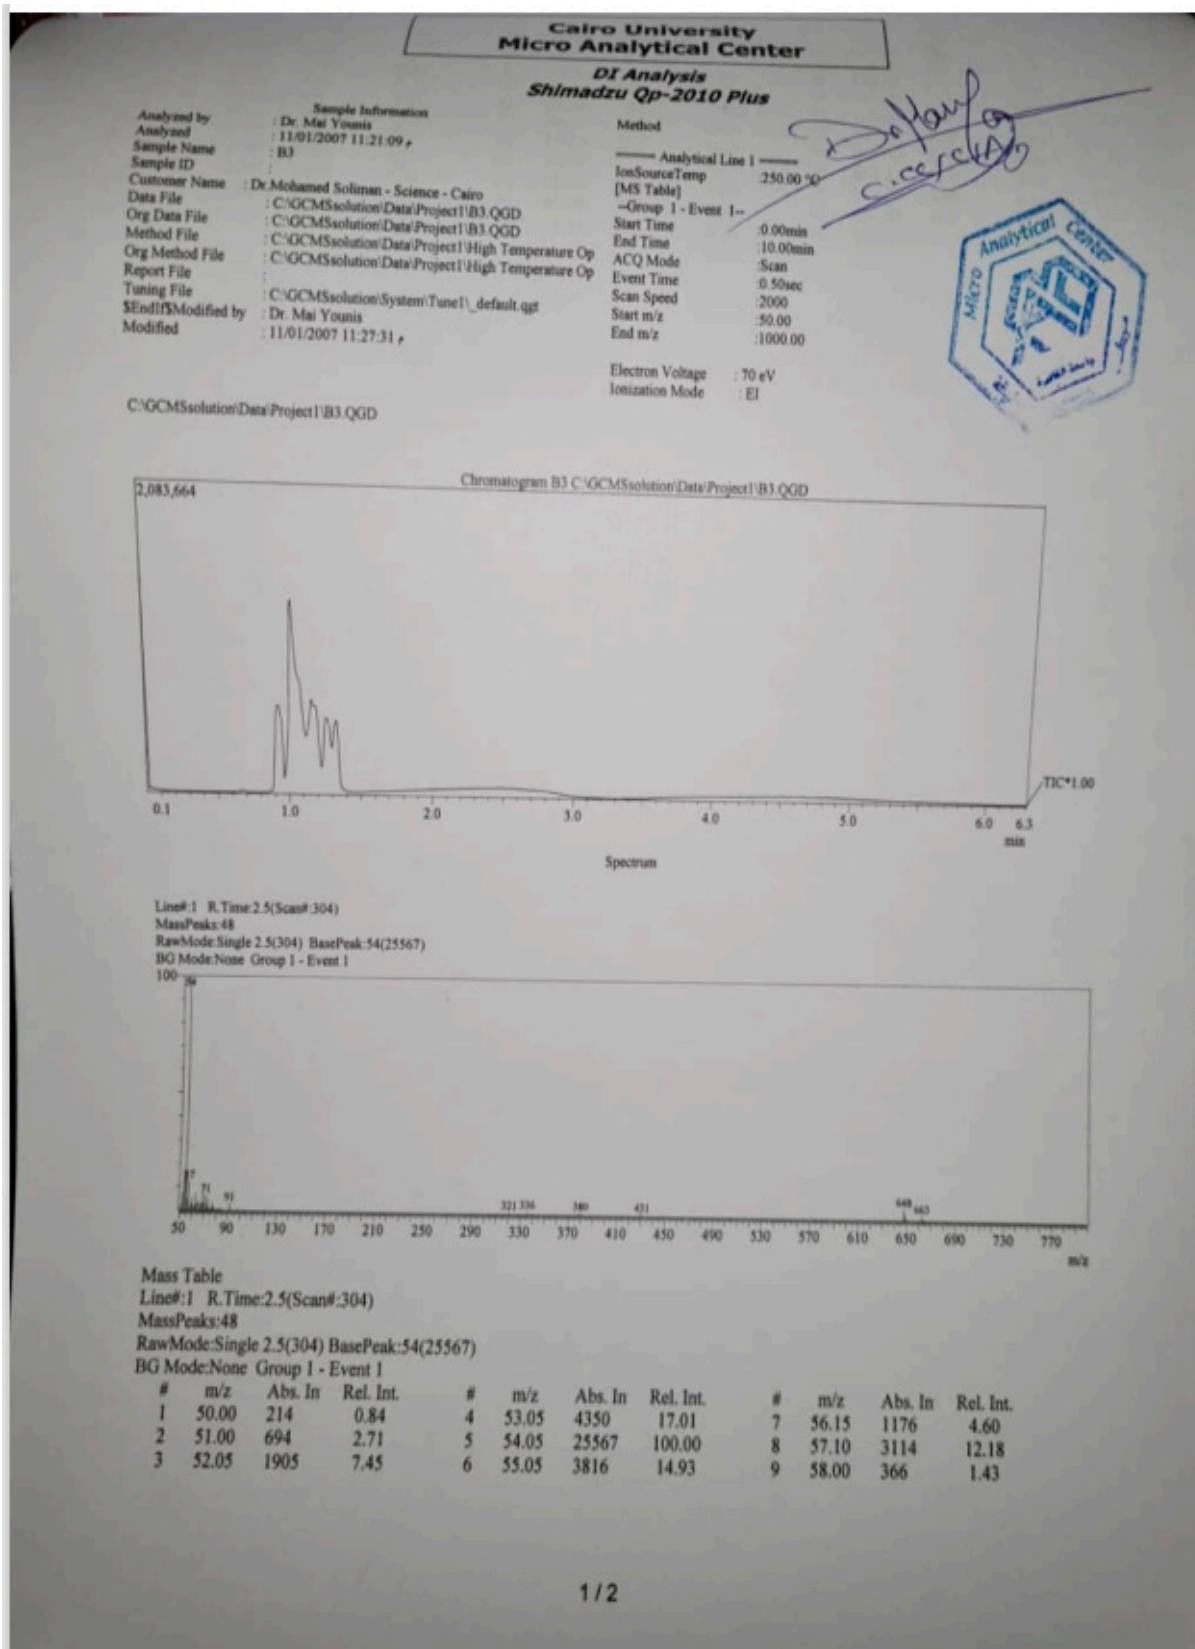

**Figure S40. Mass chart of compound 13**

| #  | m/z   | Abs. In | Rel. Int. | #  | m/z   | Abs. In | Rel. Int. | #  | m/z    | Abs. In | Rel. Int. |
|----|-------|---------|-----------|----|-------|---------|-----------|----|--------|---------|-----------|
| 10 | 59.05 | 796     | 3.11      | 23 | 72.05 | 521     | 2.04      | 36 | 92.10  | 225     | 0.88      |
| 11 | 60.00 | 1414    | 5.53      | 24 | 73.00 | 1263    | 4.94      | 37 | 98.10  | 209     | 0.82      |
| 12 | 60.95 | 613     | 2.40      | 25 | 74.00 | 391     | 1.53      | 38 | 321.10 | 258     | 1.01      |
| 13 | 62.05 | 489     | 1.91      | 26 | 75.00 | 334     | 1.31      | 39 | 336.10 | 350     | 1.37      |
| 14 | 63.05 | 1781    | 6.97      | 27 | 76.00 | 244     | 0.95      | 40 | 378.10 | 212     | 0.83      |
| 15 | 64.05 | 961     | 3.76      | 28 | 76.95 | 919     | 3.59      | 41 | 380.10 | 263     | 1.03      |
| 16 | 65.05 | 949     | 3.71      | 29 | 78.00 | 487     | 1.90      | 42 | 429.10 | 201     | 0.79      |
| 17 | 66.10 | 327     | 1.28      | 30 | 79.00 | 273     | 1.07      | 43 | 431.10 | 204     | 0.80      |
| 18 | 67.00 | 860     | 3.36      | 31 | 81.00 | 207     | 0.81      | 44 | 647.70 | 1241    | 4.85      |
| 19 | 68.15 | 800     | 3.13      | 32 | 82.00 | 210     | 0.82      | 45 | 648.65 | 719     | 2.81      |
| 20 | 69.05 | 2439    | 9.54      | 33 | 83.00 | 279     | 1.09      | 46 | 649.60 | 246     | 0.96      |
| 21 | 70.05 | 817     | 3.20      | 34 | 85.00 | 239     | 0.93      | 47 | 662.60 | 518     | 2.03      |
| 22 | 71.05 | 1665    | 6.51      | 35 | 91.10 | 807     | 3.16      | 48 | 663.60 | 239     | 0.93      |

Mass chart of compound 13

*Methyl 2-amino-5-(methylselanyl) benzoate (14).*

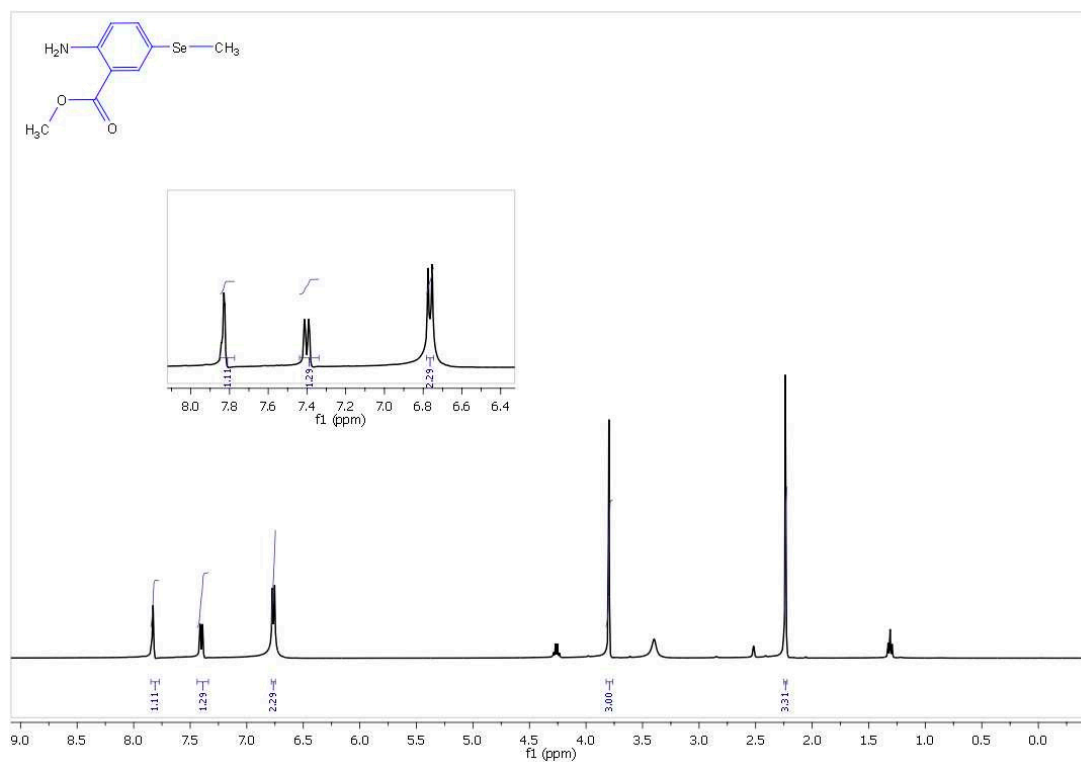

**Figure S41.** <sup>1</sup>H NMR chart of compound 14

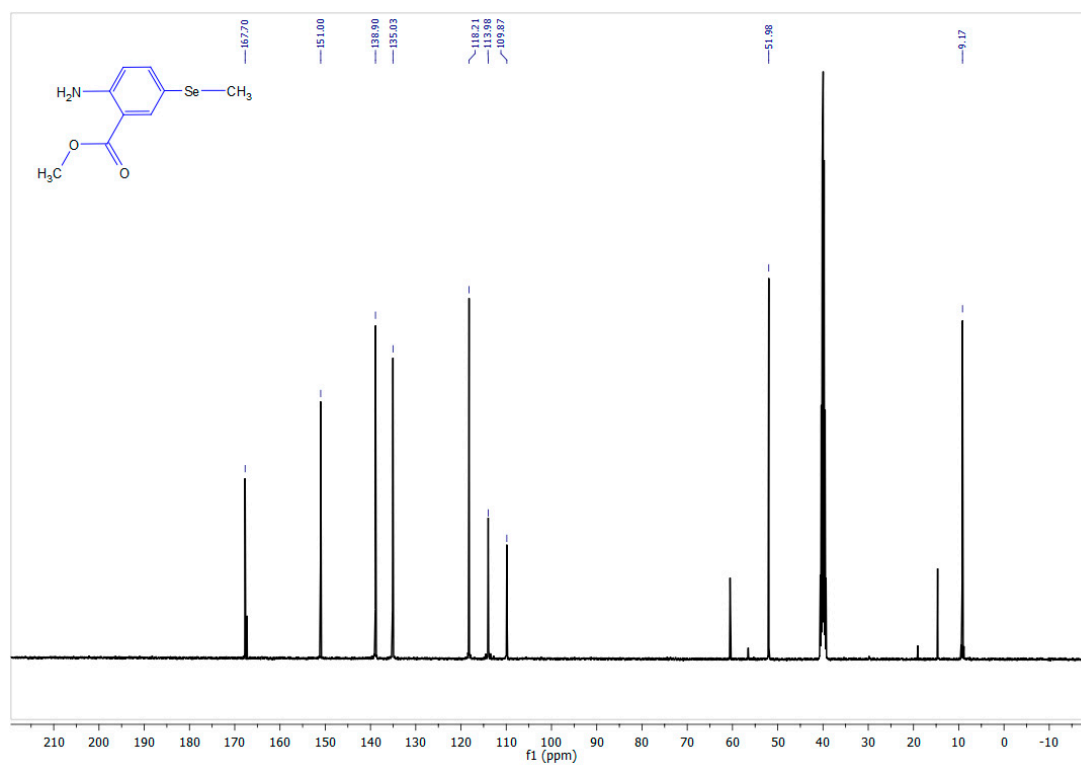

**Figure S42.** <sup>13</sup>C NMR chart of compound 14

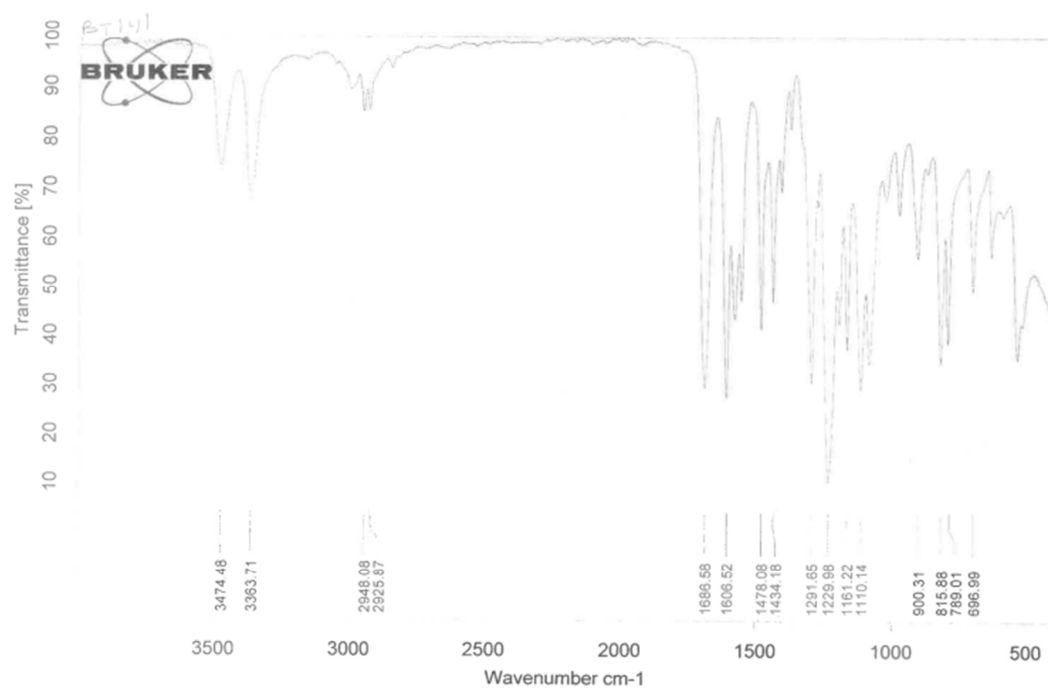

|                                                                        |   |                                    |            |
|------------------------------------------------------------------------|---|------------------------------------|------------|
| C:\Documents and Settings\adminuser\Desktop\New Folder (2)\test 1.1553 | 1 | Instrument type and / or accessory | 11/18/2021 |
|------------------------------------------------------------------------|---|------------------------------------|------------|

Page 1/1

**Figure S43.** IR chart of compound **14**

**Cairo University  
Micro Analytical Center**

**DI Analysis  
Shimadzu Qp-2010 Plus**

Sample Information  
 Analyzed by : Dr. Mai Younis  
 Analyzed : 16/01/2007 03:02:11  
 Sample Name : B35  
 Sample ID :  
 Customer Name : Dr. Mohamed Soliman - Science - Cairo  
 Data File : C:\GCMSolution\Data\Project1\B35.QGD  
 Org Data File : C:\GCMSolution\Data\Project1\B35.QGD  
 Method File : C:\GCMSolution\Data\Project1\High Temperature Op  
 Org Method File : C:\GCMSolution\Data\Project1\High Temperature Op  
 Report File :  
 Tuning File : C:\GCMSolution\System\Tune1\\_default.qgt  
 \$Endl\$Modified by : Dr. Mai Younis  
 Modified : 16/01/2007 03:12:11

Method  
 Analytical Line 1  
 IonSourceTemp : 250.00 °C  
 [MS Table]  
 --Group 1 - Event 1--  
 Start Time : 0.00min  
 End Time : 10.00min  
 ACQ Mode : Scan  
 Event Time : 0.50sec  
 Scan Speed : 1000  
 Start m/z : 50.00  
 End m/z : 510.00  
 Electron Voltage : 70 eV  
 Ionization Mode : EI

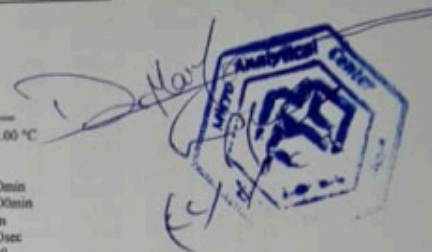

C:\GCMSolution\Data\Project1\B35.QGD

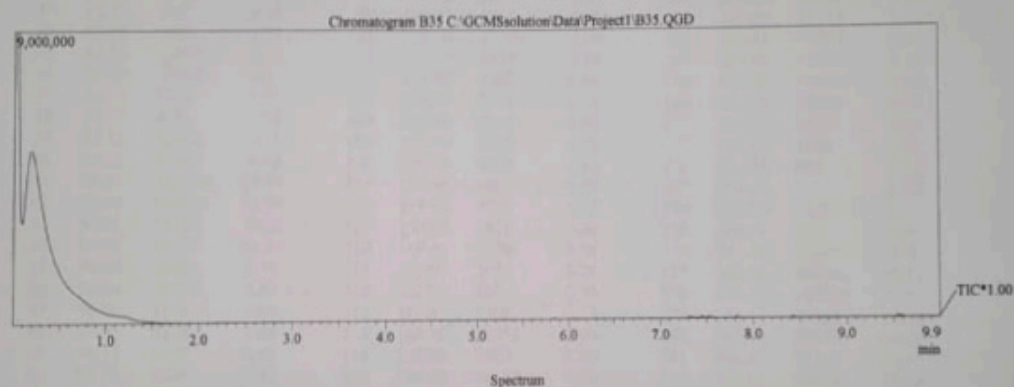

Line#:1 R.Time:0.2(Scan#:26)  
 MassPeaks:205  
 RawMode:Single 0.2(26) BasePeak:245(391154)  
 BG Mode:None Group 1 - Event 1

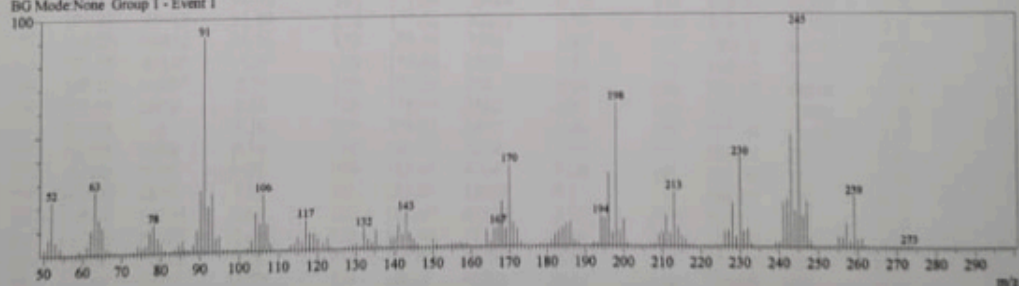

Mass Table  
 Line#:1 R.Time:0.2(Scan#:26)  
 MassPeaks:205  
 RawMode:Single 0.2(26) BasePeak:245(391154)  
 BG Mode:None Group 1 - Event 1

| # | m/z   | Abs. In | Rel. Int. | # | m/z   | Abs. In | Rel. Int. |
|---|-------|---------|-----------|---|-------|---------|-----------|
| 1 | 50.05 | 10411   | 2.66      | 4 | 53.00 | 21482   | 5.49      |
| 2 | 51.05 | 26260   | 6.71      | 5 | 54.05 | 11184   | 2.86      |
| 3 | 52.00 | 89298   | 22.83     | 6 | 55.00 | 2246    | 0.57      |
|   |       |         |           | 7 | 56.05 | 488     | 0.12      |
|   |       |         |           | 8 | 57.05 | 709     | 0.18      |
|   |       |         |           | 9 | 58.05 | 1164    | 0.30      |

**Figure S44. Mass chart of compound 14**



| #  | m/z    | Abs. In | Rel. Int. | #   | m/z    | Abs. In | Rel. Int. | #   | m/z    | Abs. In | Rel. Int. |
|----|--------|---------|-----------|-----|--------|---------|-----------|-----|--------|---------|-----------|
| 10 | 59.00  | 6150    | 1.57      | 76  | 126.05 | 2179    | 0.56      | 142 | 195.00 | 47017   | 12.02     |
| 11 | 60.05  | 1575    | 0.40      | 77  | 127.05 | 3204    | 0.82      | 143 | 196.00 | 122146  | 31.23     |
| 12 | 61.05  | 14415   | 3.69      | 78  | 128.00 | 4023    | 1.03      | 144 | 197.05 | 22307   | 5.70      |
| 13 | 62.05  | 39733   | 10.16     | 79  | 129.05 | 5617    | 1.44      | 145 | 198.00 | 241660  | 61.78     |
| 14 | 63.05  | 103836  | 26.55     | 80  | 130.00 | 7762    | 1.98      | 146 | 198.95 | 25629   | 6.55      |
| 15 | 64.05  | 57318   | 14.65     | 81  | 131.15 | 4478    | 1.14      | 147 | 200.00 | 43719   | 11.18     |
| 16 | 65.05  | 43819   | 11.20     | 82  | 132.10 | 33902   | 8.67      | 148 | 200.95 | 4204    | 1.07      |
| 17 | 66.10  | 9838    | 2.52      | 83  | 133.10 | 15628   | 4.00      | 149 | 201.95 | 533     | 0.14      |
| 18 | 67.05  | 4572    | 1.17      | 84  | 134.15 | 8746    | 2.24      | 150 | 207.00 | 2228    | 0.57      |
| 19 | 68.05  | 2933    | 0.75      | 85  | 135.10 | 31116   | 7.95      | 151 | 208.05 | 2526    | 0.65      |
| 20 | 69.10  | 1041    | 0.27      | 86  | 136.15 | 5476    | 1.40      | 152 | 209.05 | 20084   | 5.13      |
| 21 | 70.05  | 837     | 0.21      | 87  | 137.00 | 2783    | 0.71      | 153 | 210.05 | 23473   | 6.00      |
| 22 | 71.05  | 1646    | 0.42      | 88  | 138.05 | 3352    | 0.86      | 154 | 211.00 | 50268   | 12.85     |
| 23 | 72.05  | 1669    | 0.43      | 89  | 139.00 | 15473   | 3.96      | 155 | 212.05 | 22070   | 5.64      |
| 24 | 72.95  | 2952    | 0.75      | 90  | 140.00 | 17660   | 4.51      | 156 | 213.00 | 91327   | 23.35     |
| 25 | 74.05  | 12141   | 3.10      | 91  | 141.00 | 39022   | 9.98      | 157 | 214.00 | 31220   | 7.98      |
| 26 | 75.10  | 10198   | 2.61      | 92  | 142.05 | 21311   | 5.45      | 158 | 215.00 | 18164   | 4.64      |
| 27 | 76.10  | 12385   | 3.17      | 93  | 143.00 | 58711   | 15.01     | 159 | 216.00 | 12508   | 3.20      |
| 28 | 77.10  | 36498   | 9.33      | 94  | 144.00 | 25175   | 6.44      | 160 | 216.95 | 1191    | 0.30      |
| 29 | 78.05  | 47310   | 12.09     | 95  | 145.00 | 13801   | 3.53      | 161 | 218.00 | 1618    | 0.41      |
| 30 | 79.10  | 24441   | 6.25      | 96  | 146.00 | 5042    | 1.29      | 162 | 224.00 | 2599    | 0.66      |
| 31 | 80.00  | 15313   | 3.91      | 97  | 147.00 | 1039    | 0.27      | 163 | 225.05 | 1510    | 0.39      |
| 32 | 81.00  | 4794    | 1.23      | 98  | 148.10 | 804     | 0.21      | 164 | 226.05 | 26426   | 6.76      |
| 33 | 82.55  | 1873    | 0.48      | 99  | 149.15 | 1515    | 0.39      | 165 | 227.05 | 28172   | 7.20      |
| 34 | 83.55  | 6981    | 1.78      | 100 | 150.10 | 13154   | 3.36      | 166 | 228.05 | 72774   | 18.60     |
| 35 | 84.55  | 13095   | 3.35      | 101 | 151.10 | 4439    | 1.13      | 167 | 229.05 | 16399   | 4.19      |
| 36 | 85.50  | 19868   | 5.08      | 102 | 151.95 | 1797    | 0.46      | 168 | 230.05 | 148867  | 38.06     |
| 37 | 86.10  | 5970    | 1.53      | 103 | 153.00 | 3161    | 0.81      | 169 | 231.00 | 25292   | 6.47      |
| 38 | 87.05  | 4792    | 1.23      | 104 | 154.00 | 3514    | 0.90      | 170 | 232.05 | 29923   | 7.65      |
| 39 | 88.10  | 12948   | 3.31      | 105 | 155.00 | 5122    | 1.31      | 171 | 233.00 | 4730    | 1.21      |
| 40 | 89.10  | 37161   | 9.50      | 106 | 156.00 | 4514    | 1.15      | 172 | 233.95 | 605     | 0.15      |
| 41 | 90.15  | 101589  | 25.97     | 107 | 157.05 | 6492    | 1.66      | 173 | 238.15 | 734     | 0.19      |
| 42 | 91.10  | 358905  | 91.76     | 108 | 158.00 | 3975    | 1.02      | 174 | 239.10 | 6298    | 1.61      |
| 43 | 92.05  | 75198   | 19.22     | 109 | 159.00 | 5625    | 1.44      | 175 | 240.15 | 7887    | 2.02      |
| 44 | 93.00  | 97377   | 24.89     | 110 | 160.00 | 1470    | 0.38      | 176 | 241.10 | 72847   | 18.62     |
| 45 | 94.00  | 22561   | 5.77      | 111 | 161.00 | 1084    | 0.28      | 177 | 242.10 | 80234   | 20.51     |
| 46 | 95.00  | 26670   | 6.82      | 112 | 162.00 | 380     | 0.10      | 178 | 243.10 | 187193  | 47.86     |
| 47 | 96.00  | 4114    | 1.05      | 113 | 163.15 | 1307    | 0.33      | 179 | 244.15 | 60066   | 15.36     |
| 48 | 97.05  | 4225    | 1.08      | 114 | 164.10 | 28951   | 7.40      | 180 | 245.10 | 391154  | 100.00    |
| 49 | 98.35  | 2449    | 0.63      | 115 | 165.05 | 9689    | 2.48      | 181 | 246.05 | 51306   | 13.12     |
| 50 | 99.30  | 3386    | 0.87      | 116 | 166.00 | 30183   | 7.72      | 182 | 247.05 | 74480   | 19.04     |
| 51 | 100.25 | 1374    | 0.35      | 117 | 167.05 | 33926   | 8.67      | 183 | 248.05 | 8926    | 2.28      |
| 52 | 101.05 | 1757    | 0.45      | 118 | 168.00 | 75583   | 19.32     | 184 | 249.05 | 953     | 0.24      |
| 53 | 102.10 | 5450    | 1.39      | 119 | 169.05 | 30276   | 7.74      | 185 | 253.10 | 1460    | 0.37      |
| 54 | 103.15 | 15671   | 4.01      | 120 | 170.00 | 137220  | 35.08     | 186 | 254.15 | 1011    | 0.26      |
| 55 | 104.15 | 62814   | 16.06     | 121 | 171.00 | 40180   | 10.27     | 187 | 255.10 | 15329   | 3.92      |
| 56 | 105.25 | 45718   | 11.69     | 122 | 172.00 | 30348   | 7.76      | 188 | 256.15 | 16105   | 4.12      |
| 57 | 106.20 | 94842   | 24.25     | 123 | 173.00 | 7290    | 1.86      | 189 | 257.10 | 40538   | 10.36     |
| 58 | 107.15 | 45188   | 11.55     | 124 | 174.00 | 1239    | 0.32      | 190 | 258.15 | 9549    | 2.44      |
| 59 | 108.15 | 10687   | 2.73      | 125 | 177.20 | 238     | 0.06      | 191 | 259.10 | 84319   | 21.56     |
| 60 | 109.05 | 2089    | 0.53      | 126 | 178.15 | 3162    | 0.81      | 192 | 260.05 | 12047   | 3.08      |
| 61 | 110.05 | 710     | 0.18      | 127 | 179.05 | 1817    | 0.46      | 193 | 261.10 | 15478   | 3.96      |
| 62 | 111.05 | 1314    | 0.34      | 128 | 180.00 | 3514    | 0.90      | 194 | 262.05 | 2350    | 0.60      |
| 63 | 112.05 | 1199    | 0.31      | 129 | 181.05 | 9794    | 2.50      | 195 | 263.05 | 335     | 0.09      |
| 64 | 113.00 | 7610    | 1.95      | 130 | 182.00 | 19970   | 5.11      | 196 | 264.10 | 220     | 0.06      |
| 65 | 114.00 | 10354   | 2.65      | 131 | 183.00 | 25158   | 6.43      | 197 | 269.15 | 730     | 0.19      |
| 66 | 115.00 | 21430   | 5.48      | 132 | 184.00 | 31201   | 7.98      | 198 | 270.15 | 629     | 0.16      |
| 67 | 116.05 | 12818   | 3.28      | 133 | 185.00 | 38050   | 9.73      | 199 | 271.15 | 1493    | 0.38      |
| 68 | 117.05 | 50031   | 12.79     | 134 | 186.00 | 40924   | 10.46     | 200 | 272.25 | 533     | 0.14      |
| 69 | 118.05 | 27671   | 7.07      | 135 | 187.00 | 10028   | 2.56      | 201 | 273.15 | 2823    | 0.72      |
| 70 | 119.10 | 26692   | 6.82      | 136 | 188.00 | 6714    | 1.72      | 202 | 274.20 | 558     | 0.14      |
| 71 | 120.10 | 18391   | 4.70      | 137 | 189.00 | 868     | 0.22      | 203 | 275.20 | 654     | 0.17      |
| 72 | 121.55 | 12099   | 3.09      | 138 | 191.05 | 296     | 0.08      | 204 | 276.20 | 290     | 0.07      |
| 73 | 122.60 | 19750   | 5.05      | 139 | 192.00 | 4826    | 1.23      | 205 | 277.10 | 369     | 0.09      |
| 74 | 123.55 | 4338    | 1.11      | 140 | 193.05 | 2875    | 0.74      |     |        |         |           |
| 75 | 125.05 | 1061    | 0.27      | 141 | 194.00 | 49812   | 12.73     |     |        |         |           |

Mass chart of compound 14



*Methyl 2-amino-5-(benzylselanyl) benzoate (15).*

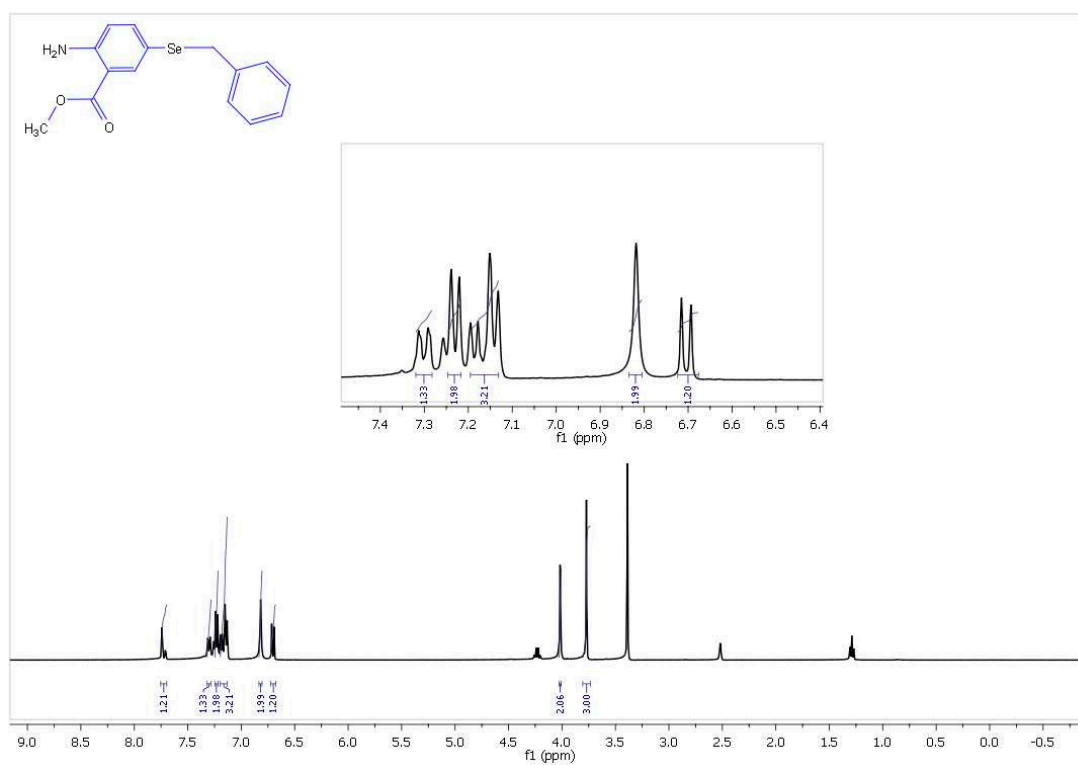

**Figure S45.** <sup>1</sup>H NMR chart of compound 15

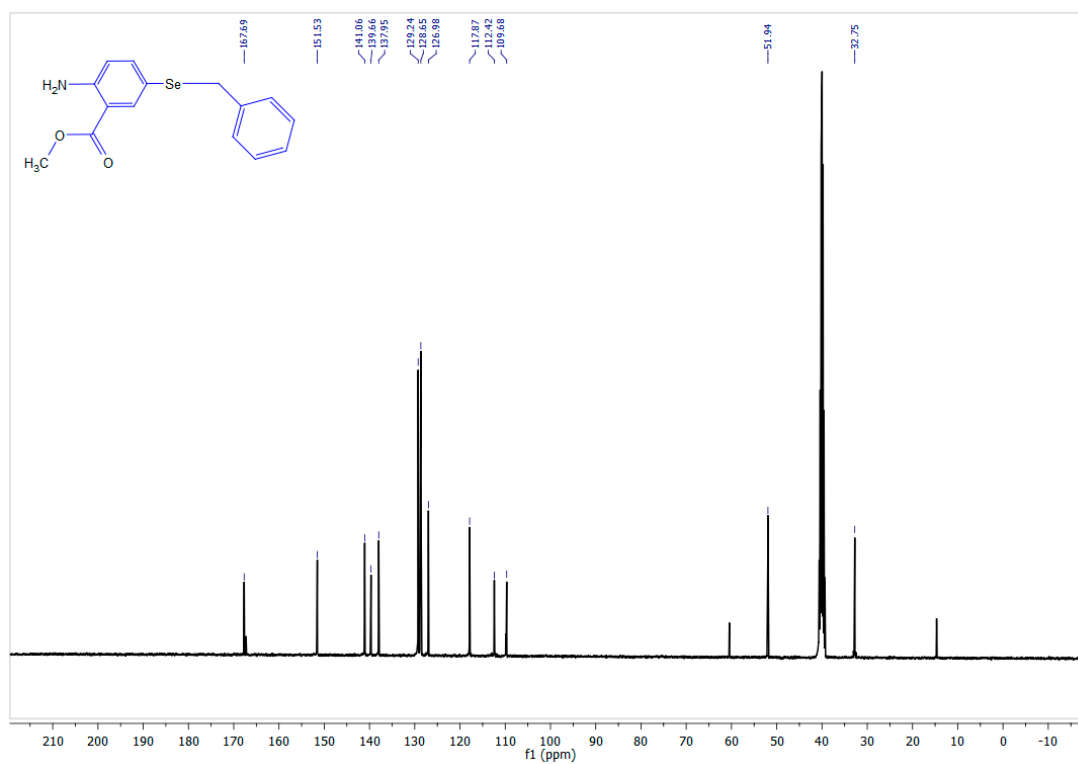

**Figure S46.** <sup>13</sup>C NMR chart of compound 15

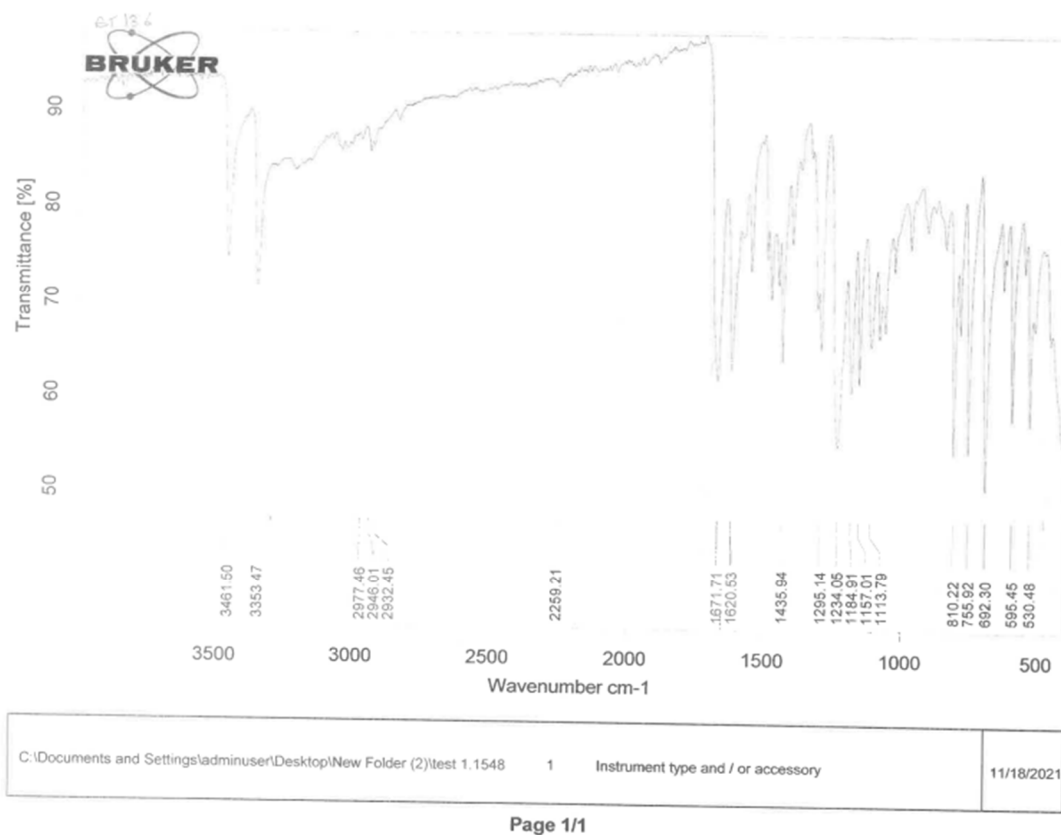

**Figure S47.** IR chart of compound **15**

# Cairo University Micro Analytical Center

## DI Analysis Shimadzu Qp-2010 Plus

Sample Information  
 Analyzed by : Dr. Mai Younis  
 Analyzed : 06/01/2007 07:49:46  
 Sample Name : B22  
 Sample ID :  
 Customer Name : Dr. Mohamed Soliman - Science - Cairo  
 Data File : C:\GCMsSolution\Data\Project1\B22.QGD  
 Org Data File : C:\GCMsSolution\Data\Project1\B22.QGD  
 Method File : C:\GCMsSolution\Data\Project1\High Temperature Op  
 Org Method File : C:\GCMsSolution\Data\Project1\High Temperature Op  
 Report File :  
 Tuning File : C:\GCMsSolution\System\Tune1\\_default.qgt  
 \$EndIf\$Modified by : Dr. Mai Younis  
 Modified : 06/01/2007 07:51:49

### Method

Analytical Line 1  
 IonSourceTemp : 250.00 °C  
 [MS Table]  
 -Group 1 - Event 1-  
 Start Time : 9.00min  
 End Time : 10.00min  
 ACQ Mode : Scan  
 Event Time : 0.50sec  
 Scan Speed : 1000  
 Start m/z : 50.00  
 End m/z : 510.00  
 Electron Voltage : 70 eV  
 Ionization Mode : EI

C:\GCMsSolution\Data\Project1\B22.QGD

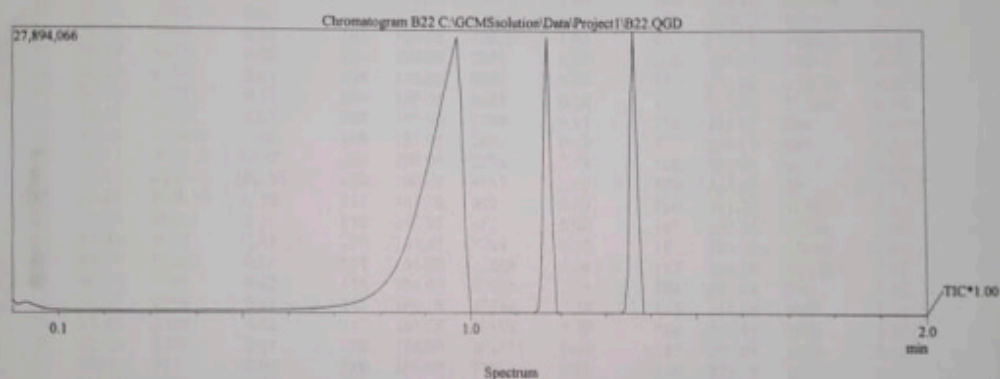

Line# 1 R.Time: 1.2 (Scan#: 143)  
 MassPeaks: 244 (Peak Elimination m/z: 423.20, 425.30)  
 RawMode: Single 1.2 (143) BasePeak: 91 (2025185)  
 BG Mode: None Group 1 - Event 1

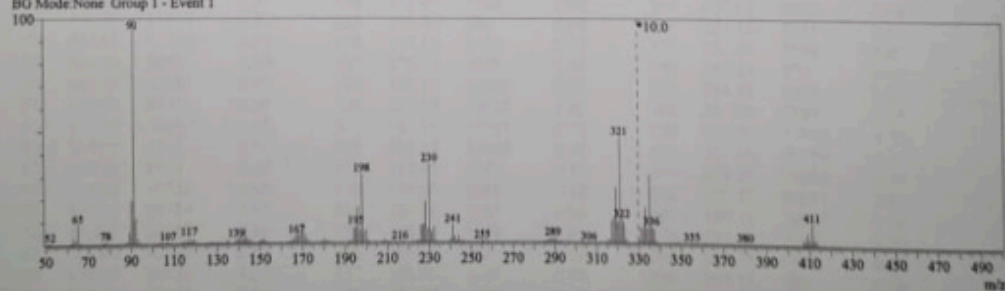

Mass Table  
 Line# 1 R.Time: 1.2 (Scan#: 143)  
 MassPeaks: 244 (Peak Elimination m/z: 423.20, 425.30)  
 RawMode: Single 1.2 (143) BasePeak: 91 (2025185)  
 BG Mode: None Group 1 - Event 1

| # | m/z   | Abs. In | Rel. Int. | # | m/z   | Abs. In | Rel. Int. | # | m/z   | Abs. In | Rel. Int. |
|---|-------|---------|-----------|---|-------|---------|-----------|---|-------|---------|-----------|
| 1 | 50.05 | 5073    | 0.25      | 4 | 52.95 | 3146    | 0.16      | 7 | 57.00 | 1097    | 0.05      |
| 2 | 51.00 | 11465   | 0.57      | 5 | 54.00 | 1751    | 0.09      | 8 | 58.05 | 483     | 0.02      |
| 3 | 52.00 | 13521   | 0.67      | 6 | 55.00 | 583     | 0.03      | 9 | 59.00 | 2993    | 0.15      |

Figure S48. Mass chart of compound 15

| #  | m/z    | Abs. In | Rel. Int. | #   | m/z    | Abs. In | Rel. Int. | #   | m/z    | Abs. In | Rel. Int. |
|----|--------|---------|-----------|-----|--------|---------|-----------|-----|--------|---------|-----------|
| 10 | 60.05  | 391     | 0.02      | 79  | 129.05 | 9313    | 0.46      | 148 | 201.95 | 1028    | 0.05      |
| 11 | 61.05  | 3772    | 0.19      | 80  | 130.05 | 11086   | 0.55      | 149 | 204.25 | 5464    | 0.27      |
| 12 | 62.05  | 17107   | 0.84      | 81  | 131.10 | 5054    | 0.25      | 150 | 205.15 | 701     | 0.03      |
| 13 | 63.00  | 56926   | 2.81      | 82  | 132.05 | 10987   | 0.54      | 151 | 206.20 | 1020    | 0.05      |
| 14 | 64.05  | 36812   | 1.82      | 83  | 133.10 | 3684    | 0.18      | 152 | 207.25 | 2877    | 0.14      |
| 15 | 65.00  | 176463  | 8.71      | 84  | 134.15 | 9264    | 0.46      | 153 | 208.20 | 14284   | 0.71      |
| 16 | 65.95  | 12878   | 0.64      | 85  | 135.05 | 30121   | 1.49      | 154 | 209.15 | 17645   | 0.87      |
| 17 | 67.00  | 1580    | 0.08      | 86  | 136.05 | 4109    | 0.20      | 155 | 210.05 | 5896    | 0.29      |
| 18 | 68.05  | 483     | 0.02      | 87  | 137.05 | 5343    | 0.26      | 156 | 211.15 | 1898    | 0.09      |
| 19 | 69.10  | 985     | 0.05      | 88  | 138.05 | 7879    | 0.39      | 157 | 212.05 | 5471    | 0.27      |
| 20 | 70.10  | 1497    | 0.07      | 89  | 139.00 | 35607   | 1.76      | 158 | 213.10 | 2154    | 0.11      |
| 21 | 71.10  | 1663    | 0.08      | 90  | 140.05 | 41787   | 2.06      | 159 | 214.05 | 4336    | 0.21      |
| 22 | 72.05  | 379     | 0.02      | 91  | 141.00 | 77244   | 3.81      | 160 | 215.15 | 994     | 0.05      |
| 23 | 73.05  | 2080    | 0.10      | 92  | 142.05 | 47101   | 2.33      | 161 | 216.10 | 6855    | 0.34      |
| 24 | 74.05  | 4921    | 0.24      | 93  | 142.95 | 126529  | 6.25      | 162 | 217.05 | 395     | 0.02      |
| 25 | 75.05  | 5212    | 0.26      | 94  | 143.95 | 48735   | 2.41      | 163 | 218.10 | 921     | 0.05      |
| 26 | 76.05  | 6114    | 0.30      | 95  | 144.95 | 28945   | 1.43      | 164 | 221.20 | 846     | 0.04      |
| 27 | 77.05  | 10886   | 0.54      | 96  | 146.05 | 23129   | 1.14      | 165 | 223.15 | 1595    | 0.08      |
| 28 | 78.05  | 20811   | 1.03      | 97  | 146.95 | 4067    | 0.20      | 166 | 224.10 | 14468   | 0.71      |
| 29 | 79.05  | 8101    | 0.40      | 98  | 148.15 | 1843    | 0.09      | 167 | 225.15 | 19403   | 0.96      |
| 30 | 80.00  | 5090    | 0.25      | 99  | 149.15 | 8597    | 0.42      | 168 | 226.10 | 153471  | 7.58      |
| 31 | 81.05  | 1605    | 0.08      | 100 | 150.15 | 20578   | 1.02      | 169 | 227.15 | 166163  | 8.20      |
| 32 | 82.15  | 1045    | 0.05      | 101 | 151.05 | 33271   | 1.64      | 170 | 228.10 | 368934  | 18.22     |
| 33 | 83.10  | 2590    | 0.13      | 102 | 152.05 | 32505   | 1.61      | 171 | 229.15 | 120571  | 5.95      |
| 34 | 84.15  | 2599    | 0.13      | 103 | 153.05 | 20872   | 1.03      | 172 | 230.10 | 706377  | 34.88     |
| 35 | 85.15  | 4470    | 0.22      | 104 | 154.05 | 7855    | 0.39      | 173 | 231.05 | 94541   | 4.67      |
| 36 | 86.05  | 4174    | 0.21      | 105 | 155.00 | 4855    | 0.24      | 174 | 232.10 | 132870  | 6.56      |
| 37 | 87.15  | 6312    | 0.31      | 106 | 155.95 | 3585    | 0.18      | 175 | 233.05 | 15116   | 0.75      |
| 38 | 88.15  | 20787   | 1.03      | 107 | 157.00 | 3398    | 0.17      | 176 | 234.05 | 960     | 0.05      |
| 39 | 89.15  | 110480  | 5.46      | 108 | 157.95 | 2693    | 0.13      | 177 | 238.15 | 969     | 0.05      |
| 40 | 90.15  | 391518  | 19.33     | 109 | 159.05 | 2274    | 0.11      | 178 | 239.25 | 4131    | 0.20      |
| 41 | 91.05  | 202518  | 100.00    | 110 | 160.05 | 4165    | 0.21      | 179 | 240.25 | 35113   | 1.73      |
| 42 | 92.05  | 228419  | 11.28     | 111 | 161.00 | 602     | 0.03      | 180 | 241.25 | 155831  | 7.69      |
| 43 | 93.05  | 46032   | 2.27      | 112 | 162.05 | 482     | 0.02      | 181 | 242.10 | 54386   | 2.69      |
| 44 | 94.00  | 4180    | 0.21      | 113 | 163.05 | 3714    | 0.18      | 182 | 243.15 | 12588   | 0.62      |
| 45 | 95.00  | 8522    | 0.42      | 114 | 164.05 | 12889   | 0.64      | 183 | 244.10 | 56178   | 2.77      |
| 46 | 96.15  | 1388    | 0.07      | 115 | 165.05 | 22436   | 1.11      | 184 | 245.05 | 8044    | 0.40      |
| 47 | 97.10  | 2596    | 0.13      | 116 | 166.05 | 47284   | 2.33      | 185 | 246.10 | 9770    | 0.48      |
| 48 | 98.10  | 2490    | 0.12      | 117 | 167.05 | 66556   | 3.29      | 186 | 247.10 | 1503    | 0.07      |
| 49 | 99.10  | 2721    | 0.13      | 118 | 168.00 | 102111  | 5.04      | 187 | 254.35 | 1823    | 0.09      |
| 50 | 100.15 | 911     | 0.04      | 119 | 169.05 | 77098   | 3.81      | 188 | 255.25 | 10721   | 0.53      |
| 51 | 101.10 | 2750    | 0.14      | 120 | 169.95 | 174770  | 8.63      | 189 | 256.15 | 3888    | 0.19      |
| 52 | 102.10 | 4402    | 0.22      | 121 | 170.95 | 74461   | 3.68      | 190 | 257.15 | 1891    | 0.09      |
| 53 | 103.10 | 7242    | 0.36      | 122 | 172.00 | 39018   | 1.93      | 191 | 258.15 | 4289    | 0.21      |
| 54 | 104.05 | 11796   | 0.58      | 123 | 172.95 | 11808   | 0.58      | 192 | 259.15 | 3074    | 0.15      |
| 55 | 105.05 | 7012    | 0.35      | 124 | 173.95 | 1305    | 0.06      | 193 | 260.15 | 2910    | 0.14      |
| 56 | 106.10 | 11636   | 0.57      | 125 | 176.15 | 889     | 0.04      | 194 | 261.15 | 2231    | 0.11      |
| 57 | 107.05 | 13258   | 0.65      | 126 | 177.15 | 2401    | 0.12      | 195 | 262.20 | 1594    | 0.08      |
| 58 | 108.00 | 3873    | 0.19      | 127 | 178.15 | 5969    | 0.29      | 196 | 283.25 | 376     | 0.02      |
| 59 | 109.15 | 1378    | 0.07      | 128 | 179.15 | 10187   | 0.50      | 197 | 284.25 | 1803    | 0.09      |
| 60 | 110.05 | 979     | 0.05      | 129 | 180.15 | 36701   | 1.81      | 198 | 285.20 | 7185    | 0.35      |
| 61 | 111.05 | 2440    | 0.12      | 130 | 181.10 | 18865   | 0.93      | 199 | 286.20 | 14742   | 0.73      |
| 62 | 112.05 | 2793    | 0.14      | 131 | 182.15 | 14965   | 0.74      | 200 | 287.15 | 23239   | 1.15      |
| 63 | 113.05 | 9979    | 0.49      | 132 | 183.05 | 3441    | 0.17      | 201 | 288.20 | 24534   | 1.21      |
| 64 | 114.05 | 12822   | 0.63      | 133 | 184.00 | 2350    | 0.12      | 202 | 289.15 | 36611   | 1.81      |
| 65 | 115.00 | 27724   | 1.37      | 134 | 185.10 | 1281    | 0.06      | 203 | 290.15 | 36028   | 1.78      |
| 66 | 116.05 | 18052   | 0.89      | 135 | 186.05 | 1167    | 0.06      | 204 | 291.10 | 11612   | 0.57      |
| 67 | 117.00 | 53988   | 2.67      | 136 | 190.05 | 602     | 0.03      | 205 | 292.15 | 6462    | 0.32      |
| 68 | 118.05 | 26835   | 1.33      | 137 | 191.05 | 1736    | 0.09      | 206 | 293.15 | 552     | 0.03      |
| 69 | 119.05 | 43451   | 2.15      | 138 | 192.05 | 12467   | 0.62      | 207 | 306.20 | 302     | 0.01      |
| 70 | 120.05 | 15785   | 0.78      | 139 | 193.05 | 17901   | 0.88      | 208 | 308.10 | 636     | 0.03      |
| 71 | 121.10 | 4878    | 0.24      | 140 | 194.05 | 131489  | 6.49      | 209 | 310.05 | 707     | 0.03      |
| 72 | 122.05 | 2063    | 0.10      | 141 | 195.05 | 146464  | 7.23      | 210 | 314.25 | 1728    | 0.09      |
| 73 | 123.10 | 1527    | 0.08      | 142 | 196.00 | 323593  | 15.98     | 211 | 315.20 | 18481   | 0.91      |
| 74 | 124.05 | 682     | 0.03      | 143 | 197.05 | 113333  | 5.60      | 212 | 316.25 | 23945   | 1.18      |
| 75 | 125.05 | 4002    | 0.20      | 144 | 198.00 | 620129  | 30.62     | 213 | 317.20 | 196281  | 9.69      |
| 76 | 126.05 | 5459    | 0.27      | 145 | 198.95 | 99120   | 4.89      | 214 | 318.25 | 227987  | 11.26     |
| 77 | 127.05 | 10480   | 0.52      | 146 | 200.00 | 113441  | 5.60      | 215 | 319.20 | 494574  | 24.42     |
| 78 | 128.05 | 10844   | 0.54      | 147 | 200.95 | 16159   | 0.80      | 216 | 320.25 | 188395  | 9.30      |

| #   | m/z    | Abs. In | Rel. Int. | #   | m/z    | Abs. In | Rel. Int. | #   | m/z    | Abs. In | Rel. Int. |
|-----|--------|---------|-----------|-----|--------|---------|-----------|-----|--------|---------|-----------|
| 217 | 321.20 | 949119  | 46.87     | 227 | 334.25 | 12617   | 0.62      | 237 | 407.30 | 3812    | 0.19      |
| 218 | 322.15 | 206457  | 10.19     | 228 | 335.20 | 61590   | 3.04      | 238 | 408.35 | 4545    | 0.22      |
| 219 | 323.15 | 182324  | 9.00      | 229 | 336.15 | 14251   | 0.70      | 239 | 409.25 | 10425   | 0.51      |
| 220 | 324.05 | 37472   | 1.85      | 230 | 337.20 | 12284   | 0.61      | 240 | 410.35 | 4385    | 0.22      |
| 221 | 325.05 | 4024    | 0.20      | 231 | 338.15 | 2137    | 0.11      | 241 | 411.25 | 19850   | 0.98      |
| 222 | 329.25 | 824     | 0.04      | 232 | 347.20 | 470     | 0.02      | 242 | 412.25 | 5834    | 0.29      |
| 223 | 330.25 | 1720    | 0.08      | 233 | 349.20 | 1524    | 0.08      | 243 | 413.25 | 4131    | 0.20      |
| 224 | 331.20 | 13207   | 0.65      | 234 | 355.20 | 474     | 0.02      | 244 | 414.15 | 786     | 0.04      |
| 225 | 332.25 | 14297   | 0.71      | 235 | 378.20 | 226     | 0.01      |     |        |         |           |
| 226 | 333.20 | 31734   | 1.57      | 236 | 380.20 | 604     | 0.03      |     |        |         |           |

*Methyl 2-amino-5-((2-oxo-2-(phenylamino) ethyl) selanyl) benzoate (16).*

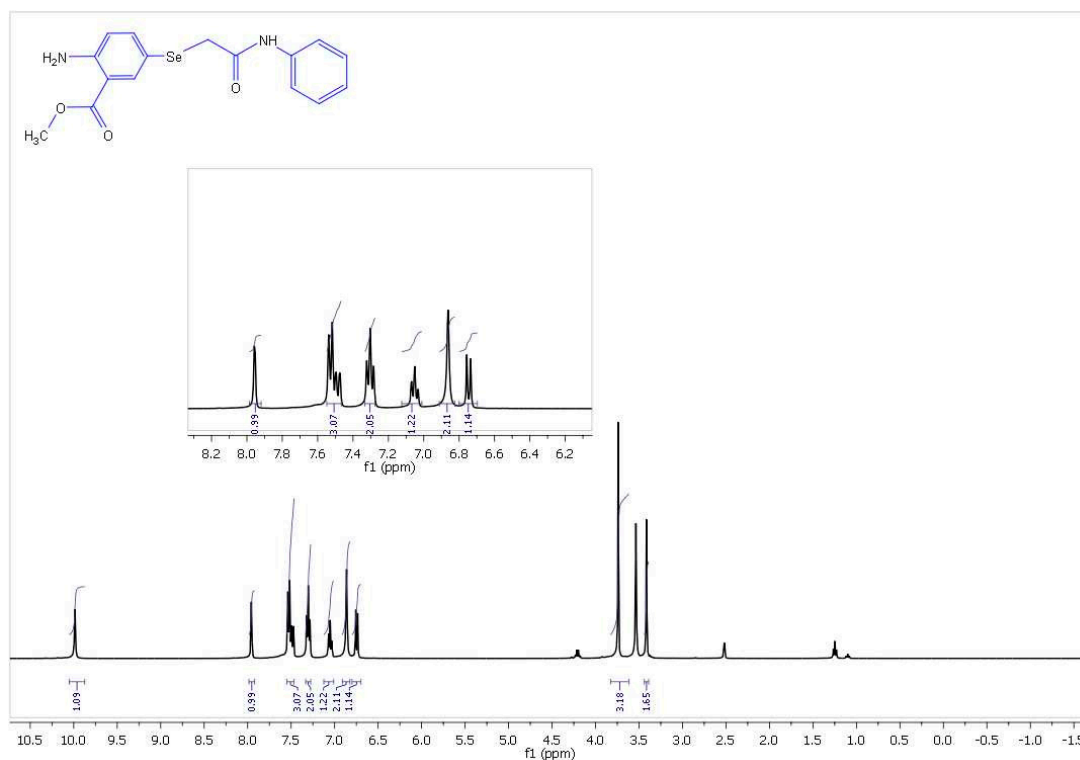

**Figure S49.** <sup>1</sup>H NMR chart of compound 16

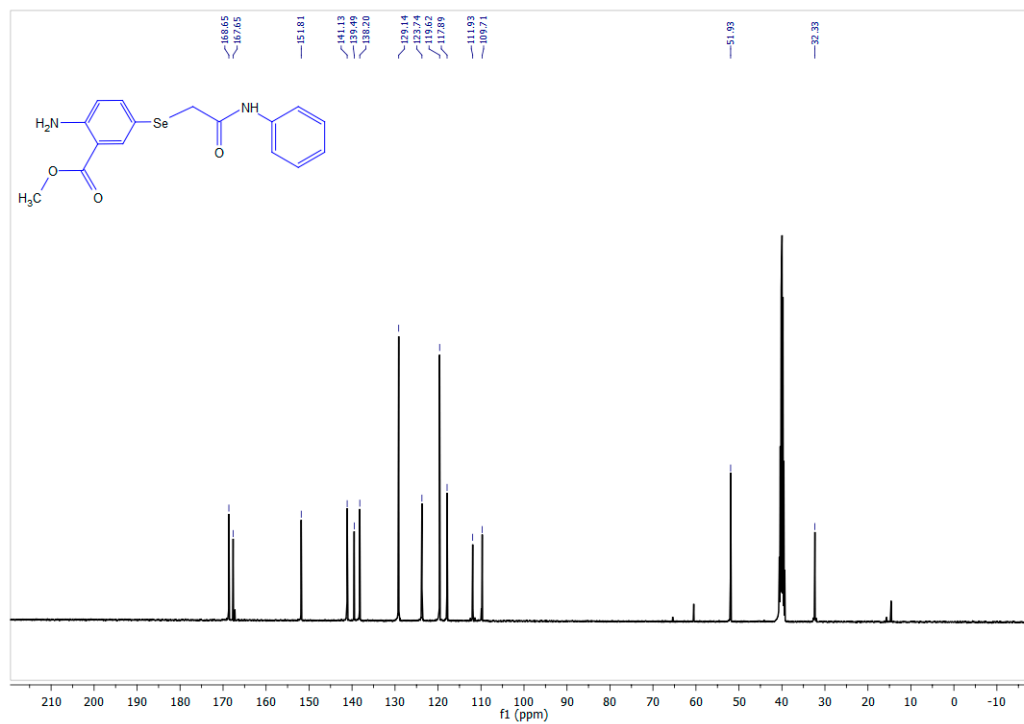

**Figure S50.** <sup>13</sup>C NMR chart of compound 16



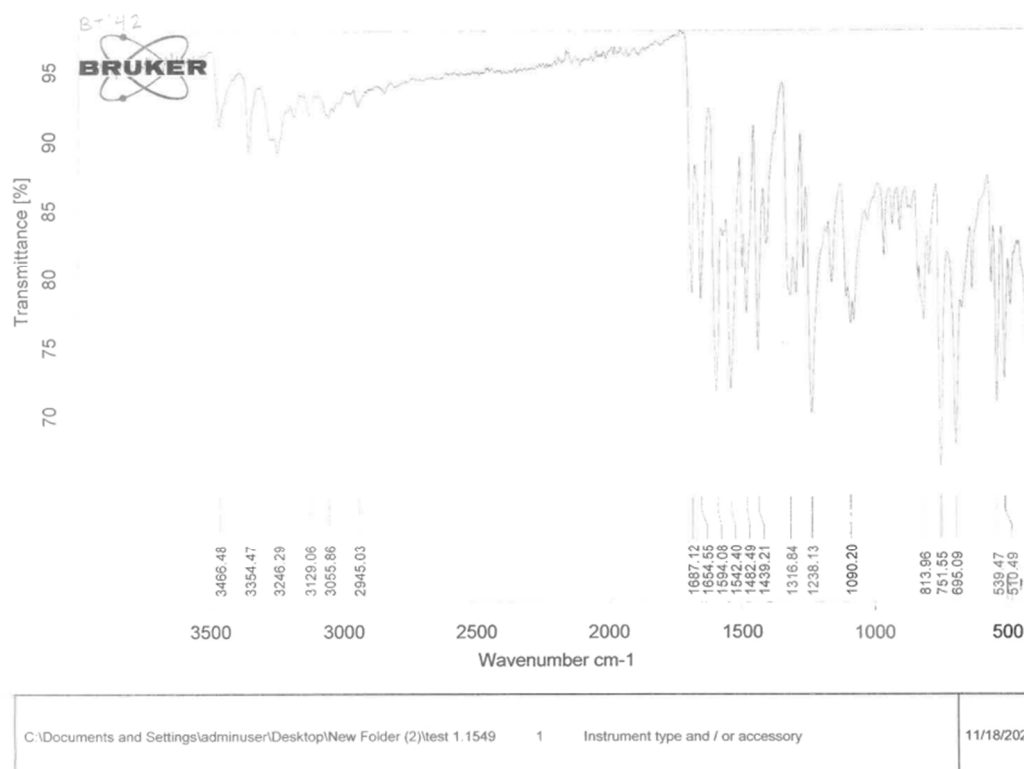

Page 1/1

**Figure S51.** IR chart of compound **16**

# Cairo University Micro Analytical Center

DI Analysis  
Shimadzu Qp-2010 Plus

Sample Information  
Analyzed by : Dr. Mai Younis  
Analyzed : 06/01/2007 08:03:42  
Sample Name : B23  
Sample ID :  
Customer Name : Dr. Mohamed Soliman - Science - Cairo  
Data File : C:\GCMSoftware\Data\Project1\B23.QGD  
Orig Data File : C:\GCMSoftware\Data\Project1\B23.QGD  
Method File : C:\GCMSoftware\Data\Project1\High Temperature Op  
Orig Method File : C:\GCMSoftware\Data\Project1\High Temperature Op  
Report File :  
Tuning File : C:\GCMSoftware\System\Tune1\\_default.qgt  
\$EndIf\$Modified by : Dr. Mai Younis  
Modified : 06/01/2007 08:06:25

Method  
Analytical Line 1  
IonSourceTemp : 250.00 °C  
[MS Table]  
-Group 1 - Event 1-  
Start Time : 0.00min  
End Time : 10.00min  
ACQ Mode : Scan  
Event Time : 0.50sec  
Scan Speed : 1000  
Start m/z : 50.00  
End m/z : 510.00  
  
Electron Voltage : 70 eV  
Ionization Mode : EI

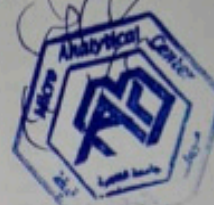

C:\GCMSoftware\Data\Project1\B23.QGD

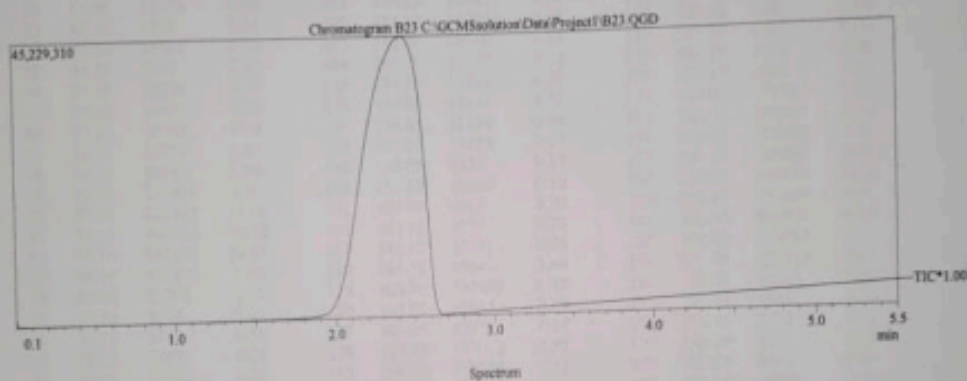

Line# 1 R.Time:2.6(Scan# 309)  
MassPeaks:395(Peak Elimination m/z: 467.40, 468.40, 469.60, 473.60, 487.60)  
RawMode:Single 2.6(309) BasePeak:364(2220999)  
BG Mode:None Group 1 - Event 1

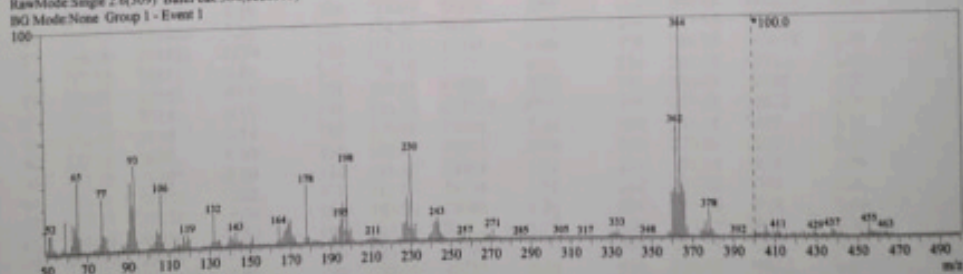

## Mass Table

Line# 1 R.Time:2.6(Scan# 309)  
MassPeaks:395(Peak Elimination m/z: 467.40, 468.40, 469.60, 473.60, 487.60)

RawMode:Single 2.6(309) BasePeak:364(2220999)

BG Mode:None Group 1 - Event 1

| # | m/z   | Abs. In | Rel. Int. | # | m/z   | Abs. In | Rel. Int. | # | m/z   | Abs. In | Rel. Int. |
|---|-------|---------|-----------|---|-------|---------|-----------|---|-------|---------|-----------|
| 1 | 50.05 | 51768   | 2.33      | 4 | 53.00 | 56865   | 2.56      | 7 | 56.05 | 7933    | 0.36      |
| 2 | 51.00 | 187841  | 8.46      | 5 | 54.00 | 39409   | 1.77      | 8 | 57.05 | 37932   | 1.71      |
| 3 | 52.00 | 198514  | 8.94      | 6 | 55.00 | 21300   | 0.96      | 9 | 58.05 | 57716   | 2.60      |

Figure S52. Mass chart of compound 16

| #  | m/z    | Abs. In | Rel. Int. | #   | m/z    | Abs. In | Rel. Int. | #   | m/z    | Abs. In | Rel. Int. |
|----|--------|---------|-----------|-----|--------|---------|-----------|-----|--------|---------|-----------|
| 10 | 59.00  | 323380  | 14.56     | 79  | 128.15 | 17920   | 0.81      | 148 | 197.05 | 127657  | 5.75      |
| 11 | 60.00  | 19518   | 0.88      | 80  | 129.15 | 16582   | 0.75      | 149 | 198.00 | 802486  | 36.13     |
| 12 | 61.05  | 25294   | 1.14      | 81  | 130.15 | 23991   | 1.08      | 150 | 198.95 | 111117  | 5.00      |
| 13 | 62.05  | 85663   | 3.86      | 82  | 131.15 | 62358   | 2.81      | 151 | 200.00 | 147049  | 6.62      |
| 14 | 63.05  | 284974  | 12.83     | 83  | 132.10 | 333977  | 15.04     | 152 | 201.00 | 27327   | 1.23      |
| 15 | 64.05  | 250676  | 11.29     | 84  | 133.15 | 66067   | 2.97      | 153 | 202.05 | 6591    | 0.30      |
| 16 | 65.00  | 718538  | 32.35     | 85  | 134.15 | 78340   | 3.53      | 154 | 203.15 | 3651    | 0.16      |
| 17 | 66.00  | 152620  | 6.87      | 86  | 135.15 | 69517   | 3.13      | 155 | 204.15 | 2634    | 0.12      |
| 18 | 66.95  | 28433   | 1.28      | 87  | 136.15 | 11769   | 0.53      | 156 | 205.10 | 8610    | 0.39      |
| 19 | 68.05  | 8877    | 0.40      | 88  | 137.10 | 7681    | 0.35      | 157 | 206.05 | 3512    | 0.16      |
| 20 | 69.05  | 15359   | 0.69      | 89  | 138.15 | 13090   | 0.59      | 158 | 207.05 | 11680   | 0.53      |
| 21 | 70.05  | 8547    | 0.38      | 90  | 139.15 | 52322   | 2.36      | 159 | 208.05 | 15928   | 0.72      |
| 22 | 71.05  | 14796   | 0.67      | 91  | 140.10 | 117575  | 5.29      | 160 | 209.05 | 33769   | 1.52      |
| 23 | 72.05  | 7256    | 0.33      | 92  | 141.05 | 90195   | 4.06      | 161 | 210.05 | 30291   | 1.36      |
| 24 | 73.05  | 29968   | 1.35      | 93  | 142.05 | 52676   | 2.37      | 162 | 211.05 | 55042   | 2.48      |
| 25 | 74.05  | 26922   | 1.21      | 94  | 143.00 | 141599  | 6.38      | 163 | 212.05 | 30408   | 1.37      |
| 26 | 75.05  | 38018   | 1.71      | 95  | 144.00 | 54009   | 2.43      | 164 | 213.05 | 31320   | 1.41      |
| 27 | 76.05  | 89648   | 4.04      | 96  | 145.05 | 43425   | 1.96      | 165 | 214.05 | 18869   | 0.85      |
| 28 | 77.05  | 535908  | 24.13     | 97  | 146.05 | 54032   | 2.43      | 166 | 215.05 | 9367    | 0.42      |
| 29 | 78.05  | 171575  | 7.73      | 98  | 147.10 | 12569   | 0.57      | 167 | 216.05 | 19840   | 0.89      |
| 30 | 79.05  | 144276  | 6.50      | 99  | 148.10 | 17756   | 0.80      | 168 | 217.05 | 4333    | 0.20      |
| 31 | 80.05  | 37639   | 1.69      | 100 | 149.15 | 8208    | 0.37      | 169 | 218.05 | 4479    | 0.20      |
| 32 | 81.05  | 11176   | 0.50      | 101 | 150.15 | 38743   | 1.74      | 170 | 219.10 | 2612    | 0.12      |
| 33 | 82.15  | 5419    | 0.24      | 102 | 151.10 | 102964  | 4.64      | 171 | 220.10 | 778     | 0.04      |
| 34 | 83.10  | 15562   | 0.70      | 103 | 152.05 | 16710   | 0.75      | 172 | 221.15 | 1397    | 0.06      |
| 35 | 84.15  | 7935    | 0.36      | 104 | 153.10 | 11177   | 0.50      | 173 | 222.15 | 1142    | 0.05      |
| 36 | 85.10  | 16374   | 0.74      | 105 | 154.10 | 14711   | 0.66      | 174 | 223.15 | 4881    | 0.22      |
| 37 | 86.15  | 16002   | 0.72      | 106 | 155.05 | 15641   | 0.70      | 175 | 224.05 | 17976   | 0.81      |
| 38 | 87.10  | 69636   | 3.14      | 107 | 156.05 | 11100   | 0.50      | 176 | 225.15 | 20916   | 0.94      |
| 39 | 88.15  | 32733   | 1.47      | 108 | 157.05 | 15214   | 0.69      | 177 | 226.10 | 174902  | 7.87      |
| 40 | 89.15  | 88448   | 3.98      | 109 | 158.05 | 8233    | 0.37      | 178 | 227.15 | 189200  | 8.52      |
| 41 | 90.15  | 210874  | 9.49      | 110 | 159.10 | 16986   | 0.76      | 179 | 228.05 | 447454  | 20.15     |
| 42 | 91.10  | 688561  | 31.00     | 111 | 160.05 | 4503    | 0.20      | 180 | 229.15 | 133404  | 6.01      |
| 43 | 92.15  | 463765  | 20.88     | 112 | 161.15 | 4537    | 0.20      | 181 | 230.05 | 899020  | 40.48     |
| 44 | 93.10  | 862055  | 38.81     | 113 | 162.15 | 5173    | 0.23      | 182 | 231.05 | 114924  | 5.17      |
| 45 | 94.05  | 112159  | 5.05      | 114 | 163.15 | 35647   | 1.60      | 183 | 232.05 | 173318  | 7.80      |
| 46 | 95.00  | 27708   | 1.25      | 115 | 164.10 | 195450  | 8.80      | 184 | 233.05 | 21637   | 0.97      |
| 47 | 96.10  | 5274    | 0.24      | 116 | 165.05 | 50811   | 2.29      | 185 | 234.05 | 3484    | 0.16      |
| 48 | 97.10  | 9146    | 0.41      | 117 | 166.05 | 92270   | 4.15      | 186 | 235.15 | 3179    | 0.14      |
| 49 | 98.15  | 5237    | 0.24      | 118 | 167.05 | 149172  | 6.72      | 187 | 236.15 | 3807    | 0.17      |
| 50 | 99.10  | 12962   | 0.58      | 119 | 168.05 | 172761  | 7.78      | 188 | 237.05 | 8985    | 0.40      |
| 51 | 100.15 | 13487   | 0.61      | 120 | 169.05 | 226041  | 10.18     | 189 | 238.15 | 10887   | 0.49      |
| 52 | 101.10 | 60012   | 2.70      | 121 | 170.00 | 257615  | 11.60     | 190 | 239.10 | 48174   | 2.17      |
| 53 | 102.15 | 30642   | 1.38      | 122 | 171.00 | 96798   | 4.36      | 191 | 240.10 | 75681   | 3.41      |
| 54 | 103.15 | 88585   | 3.99      | 123 | 172.00 | 69998   | 3.15      | 192 | 241.10 | 157647  | 7.10      |
| 55 | 104.10 | 204116  | 9.19      | 124 | 173.00 | 21033   | 0.95      | 193 | 242.15 | 186228  | 8.38      |
| 56 | 105.15 | 159966  | 7.20      | 125 | 174.10 | 7897    | 0.36      | 194 | 243.10 | 230793  | 10.39     |
| 57 | 106.10 | 568420  | 25.59     | 126 | 175.15 | 17735   | 0.80      | 195 | 244.05 | 179124  | 8.07      |
| 58 | 107.10 | 76871   | 3.46      | 127 | 176.15 | 7737    | 0.35      | 196 | 245.05 | 65413   | 2.95      |
| 59 | 108.05 | 12580   | 0.57      | 128 | 177.15 | 62536   | 2.82      | 197 | 246.05 | 36727   | 1.65      |
| 60 | 109.10 | 3719    | 0.17      | 129 | 178.10 | 605762  | 27.27     | 198 | 247.20 | 22822   | 1.03      |
| 61 | 110.15 | 3039    | 0.14      | 130 | 179.05 | 72024   | 3.24      | 199 | 248.15 | 7827    | 0.35      |
| 62 | 111.15 | 9856    | 0.44      | 131 | 180.05 | 20815   | 0.94      | 200 | 249.15 | 2124    | 0.10      |
| 63 | 112.15 | 15347   | 0.69      | 132 | 181.10 | 26969   | 1.21      | 201 | 250.25 | 1855    | 0.08      |
| 64 | 113.10 | 93678   | 4.22      | 133 | 182.05 | 36544   | 1.65      | 202 | 251.20 | 7351    | 0.33      |
| 65 | 114.15 | 34219   | 1.54      | 134 | 183.10 | 28086   | 1.26      | 203 | 252.15 | 3123    | 0.14      |
| 66 | 115.10 | 49390   | 2.22      | 135 | 184.05 | 26423   | 1.19      | 204 | 253.15 | 6626    | 0.30      |
| 67 | 116.15 | 38664   | 1.74      | 136 | 185.00 | 19938   | 0.90      | 205 | 254.15 | 7024    | 0.32      |
| 68 | 117.10 | 130407  | 5.87      | 137 | 186.00 | 10751   | 0.48      | 206 | 255.10 | 19212   | 0.87      |
| 69 | 118.15 | 63644   | 2.87      | 138 | 187.05 | 6516    | 0.29      | 207 | 256.15 | 19273   | 0.87      |
| 70 | 119.10 | 142945  | 6.44      | 139 | 188.25 | 4750    | 0.21      | 208 | 257.10 | 29007   | 1.31      |
| 71 | 120.10 | 98100   | 4.42      | 140 | 189.15 | 25047   | 1.13      | 209 | 258.15 | 10175   | 0.46      |
| 72 | 121.05 | 14291   | 0.64      | 141 | 190.15 | 9994    | 0.45      | 210 | 259.20 | 21718   | 0.98      |
| 73 | 122.10 | 5969    | 0.27      | 142 | 191.15 | 57570   | 2.59      | 211 | 260.15 | 6061    | 0.27      |
| 74 | 123.05 | 3081    | 0.14      | 143 | 192.10 | 82754   | 3.73      | 212 | 261.15 | 4356    | 0.20      |
| 75 | 124.15 | 1538    | 0.07      | 144 | 193.05 | 33585   | 1.51      | 213 | 262.15 | 3391    | 0.15      |
| 76 | 125.15 | 3955    | 0.18      | 145 | 194.05 | 172249  | 7.76      | 214 | 263.15 | 3353    | 0.15      |
| 77 | 126.15 | 7068    | 0.32      | 146 | 195.05 | 249002  | 11.21     | 215 | 264.10 | 1687    | 0.08      |
| 78 | 127.15 | 19469   | 0.88      | 147 | 196.00 | 413670  | 18.63     | 216 | 265.15 | 3515    | 0.16      |

Mass chart of compound 16



| #   | m/z    | Abs. In | Rel. Int. | #   | m/z    | Abs. In | Rel. Int. | #   | m/z    | Abs. In | Rel. Int. |
|-----|--------|---------|-----------|-----|--------|---------|-----------|-----|--------|---------|-----------|
| 217 | 266.15 | 2637    | 0.12      | 277 | 326.15 | 836     | 0.04      | 337 | 387.30 | 279     | 0.01      |
| 218 | 267.10 | 18146   | 0.82      | 278 | 327.15 | 2834    | 0.13      | 338 | 388.25 | 396     | 0.02      |
| 219 | 268.15 | 20158   | 0.91      | 279 | 328.15 | 6050    | 0.27      | 339 | 389.35 | 651     | 0.03      |
| 220 | 269.10 | 46786   | 2.11      | 280 | 329.15 | 23275   | 1.05      | 340 | 390.25 | 1290    | 0.06      |
| 221 | 270.15 | 15694   | 0.71      | 281 | 330.15 | 29151   | 1.31      | 341 | 391.35 | 1022    | 0.05      |
| 222 | 271.10 | 96137   | 4.33      | 282 | 331.15 | 50733   | 2.28      | 342 | 392.30 | 1966    | 0.09      |
| 223 | 272.05 | 16070   | 0.72      | 283 | 332.15 | 33893   | 1.53      | 343 | 393.35 | 1297    | 0.06      |
| 224 | 273.10 | 21305   | 0.96      | 284 | 333.15 | 88344   | 3.98      | 344 | 394.30 | 940     | 0.04      |
| 225 | 274.05 | 3890    | 0.18      | 285 | 334.05 | 24078   | 1.08      | 345 | 395.30 | 473     | 0.02      |
| 226 | 275.15 | 1899    | 0.09      | 286 | 335.15 | 19856   | 0.89      | 346 | 396.45 | 384     | 0.02      |
| 227 | 276.25 | 1345    | 0.06      | 287 | 336.15 | 4538    | 0.20      | 347 | 397.50 | 1070    | 0.05      |
| 228 | 277.20 | 2796    | 0.13      | 288 | 337.15 | 1006    | 0.05      | 348 | 398.45 | 585     | 0.03      |
| 229 | 278.15 | 1435    | 0.06      | 289 | 338.25 | 662     | 0.03      | 349 | 399.45 | 317     | 0.01      |
| 230 | 279.15 | 898     | 0.04      | 290 | 339.30 | 1508    | 0.07      | 350 | 400.20 | 370     | 0.02      |
| 231 | 280.15 | 727     | 0.03      | 291 | 340.25 | 578     | 0.03      | 351 | 401.20 | 289     | 0.01      |
| 232 | 281.15 | 2478    | 0.11      | 292 | 341.25 | 684     | 0.03      | 352 | 402.20 | 250     | 0.01      |
| 233 | 282.15 | 2409    | 0.11      | 293 | 342.25 | 584     | 0.03      | 353 | 403.20 | 257     | 0.01      |
| 234 | 283.10 | 5790    | 0.26      | 294 | 343.25 | 805     | 0.04      | 354 | 404.45 | 336     | 0.02      |
| 235 | 284.15 | 3531    | 0.16      | 295 | 344.20 | 1958    | 0.09      | 355 | 405.40 | 1146    | 0.05      |
| 236 | 285.10 | 12303   | 0.55      | 296 | 345.25 | 2706    | 0.12      | 356 | 406.35 | 447     | 0.02      |
| 237 | 286.15 | 5148    | 0.23      | 297 | 346.20 | 3890    | 0.18      | 357 | 407.40 | 271     | 0.01      |
| 238 | 287.10 | 5833    | 0.26      | 298 | 347.25 | 4640    | 0.21      | 358 | 409.45 | 410     | 0.02      |
| 239 | 288.25 | 2633    | 0.12      | 299 | 348.20 | 7434    | 0.33      | 359 | 410.50 | 282     | 0.01      |
| 240 | 289.15 | 7201    | 0.32      | 300 | 349.15 | 2578    | 0.12      | 360 | 411.50 | 583     | 0.03      |
| 241 | 290.15 | 2596    | 0.12      | 301 | 350.15 | 2611    | 0.12      | 361 | 412.50 | 284     | 0.01      |
| 242 | 291.20 | 2186    | 0.10      | 302 | 351.20 | 977     | 0.04      | 362 | 415.50 | 254     | 0.01      |
| 243 | 292.15 | 1131    | 0.05      | 303 | 352.15 | 764     | 0.03      | 363 | 417.50 | 207     | 0.01      |
| 244 | 293.25 | 1594    | 0.07      | 304 | 353.25 | 847     | 0.04      | 364 | 418.50 | 257     | 0.01      |
| 245 | 294.25 | 1118    | 0.05      | 305 | 354.15 | 553     | 0.02      | 365 | 419.50 | 354     | 0.02      |
| 246 | 295.20 | 5345    | 0.24      | 306 | 355.25 | 657     | 0.03      | 366 | 421.50 | 326     | 0.01      |
| 247 | 296.15 | 1761    | 0.08      | 307 | 356.25 | 704     | 0.03      | 367 | 423.50 | 396     | 0.02      |
| 248 | 297.25 | 811     | 0.04      | 308 | 357.25 | 3443    | 0.16      | 368 | 425.50 | 250     | 0.01      |
| 249 | 298.35 | 617     | 0.03      | 309 | 358.20 | 42783   | 1.93      | 369 | 426.50 | 212     | 0.01      |
| 250 | 299.30 | 823     | 0.04      | 310 | 359.25 | 41697   | 1.88      | 370 | 428.35 | 430     | 0.02      |
| 251 | 300.25 | 1273    | 0.06      | 311 | 360.20 | 448631  | 20.20     | 371 | 429.30 | 458     | 0.02      |
| 252 | 301.25 | 1429    | 0.06      | 312 | 361.25 | 490508  | 22.09     | 372 | 430.30 | 231     | 0.01      |
| 253 | 302.25 | 2061    | 0.09      | 313 | 362.20 | 113024  | 50.89     | 373 | 432.30 | 222     | 0.01      |
| 254 | 303.30 | 3346    | 0.15      | 314 | 363.25 | 433043  | 19.50     | 374 | 433.30 | 212     | 0.01      |
| 255 | 304.35 | 3895    | 0.18      | 315 | 364.20 | 222099  | 100.00    | 375 | 434.30 | 201     | 0.01      |
| 256 | 305.30 | 14001   | 0.63      | 316 | 365.15 | 516139  | 23.24     | 376 | 436.40 | 250     | 0.01      |
| 257 | 306.20 | 5601    | 0.25      | 317 | 366.15 | 453240  | 20.41     | 377 | 437.45 | 688     | 0.03      |
| 258 | 307.15 | 2298    | 0.10      | 318 | 367.15 | 94607   | 4.26      | 378 | 438.35 | 497     | 0.02      |
| 259 | 308.15 | 902     | 0.04      | 319 | 368.15 | 13453   | 0.61      | 379 | 439.50 | 431     | 0.02      |
| 260 | 309.30 | 892     | 0.04      | 320 | 369.15 | 2332    | 0.10      | 380 | 441.50 | 303     | 0.01      |
| 261 | 310.25 | 583     | 0.03      | 321 | 370.30 | 4468    | 0.20      | 381 | 442.50 | 233     | 0.01      |
| 262 | 311.35 | 721     | 0.03      | 322 | 371.25 | 1831    | 0.08      | 382 | 444.50 | 210     | 0.01      |
| 263 | 312.35 | 712     | 0.03      | 323 | 372.20 | 5146    | 0.23      | 383 | 451.50 | 289     | 0.01      |
| 264 | 313.35 | 1160    | 0.05      | 324 | 373.25 | 5093    | 0.23      | 384 | 452.50 | 233     | 0.01      |
| 265 | 314.35 | 803     | 0.04      | 325 | 374.25 | 54806   | 2.47      | 385 | 454.45 | 304     | 0.01      |
| 266 | 315.35 | 918     | 0.04      | 326 | 375.25 | 61887   | 2.79      | 386 | 455.40 | 1105    | 0.05      |
| 267 | 316.35 | 904     | 0.04      | 327 | 376.20 | 144442  | 6.50      | 387 | 456.35 | 499     | 0.02      |
| 268 | 317.30 | 4386    | 0.20      | 328 | 377.25 | 48025   | 2.16      | 388 | 457.10 | 265     | 0.01      |
| 269 | 318.25 | 2391    | 0.11      | 329 | 378.20 | 271025  | 12.20     | 389 | 458.15 | 443     | 0.02      |
| 270 | 319.25 | 2801    | 0.13      | 330 | 379.15 | 67760   | 3.05      | 390 | 459.10 | 218     | 0.01      |
| 271 | 320.25 | 1770    | 0.08      | 331 | 380.20 | 56982   | 2.57      | 391 | 460.20 | 433     | 0.02      |
| 272 | 321.20 | 4260    | 0.19      | 332 | 381.15 | 13270   | 0.60      | 392 | 462.20 | 287     | 0.01      |
| 273 | 322.25 | 2058    | 0.09      | 333 | 382.15 | 2182    | 0.10      | 393 | 463.40 | 473     | 0.02      |
| 274 | 323.25 | 2501    | 0.11      | 334 | 383.20 | 484     | 0.02      | 394 | 464.40 | 252     | 0.01      |
| 275 | 324.25 | 848     | 0.04      | 335 | 384.20 | 236     | 0.01      | 395 | 466.40 | 212     | 0.01      |
| 276 | 325.15 | 508     | 0.02      | 336 | 386.20 | 215     | 0.01      |     |        |         |           |

Mass chart of compound 16
